# Supplementary material
Source: MDPI journal article supplement (https://www.mdpi.com/2077-0472/12/2/134)
Supplement: s1 [file s1]

Dominique Dambier, Pascal Barantin, Gabriel Boulard, Gilles Costantino, Pierre Mournet, Aude Perdereau, Raphaël Morillon and Patrick Ollitrault. Genomic instability in somatic hybridization of Poncirus and Citrus species aiming to create new rootstocks. Agriculture.

**Supplementary figure S1:** Evolution of ancestor read frequencies along the nine chromosome for the 5 cybrids, the 15 somatic hybrids and their parents.

For all figures:

Each dot is the average of ancestral read frequencies for 45 successive DSNPs of the considered ancestor with sliding windows every 15 DSNPs. For each window, the considered genomic position is the average of the position of the considered DSNPs.

Green dots: *P. trifoliata*; orange dots: *C. reticulata*; blue dots: *C. maxima*.

The x axe is the position in the considered chromosome in bp.

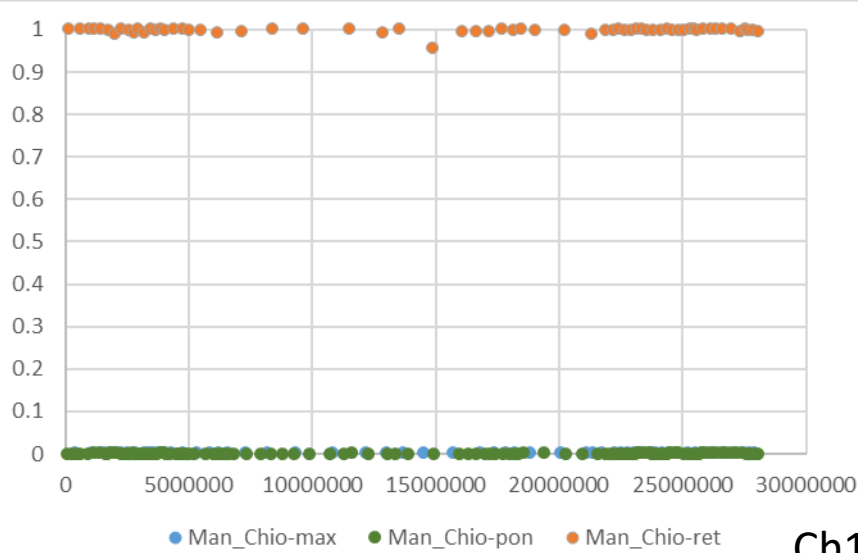

Ch1

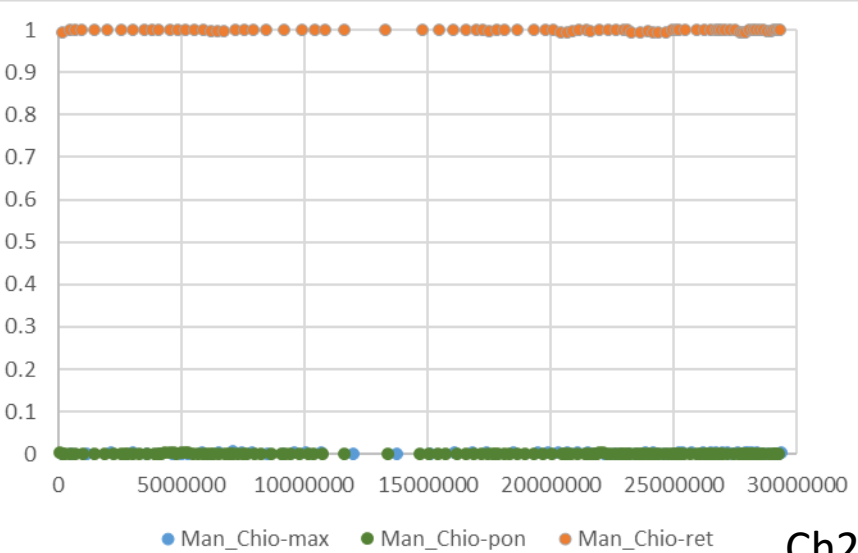

Ch2

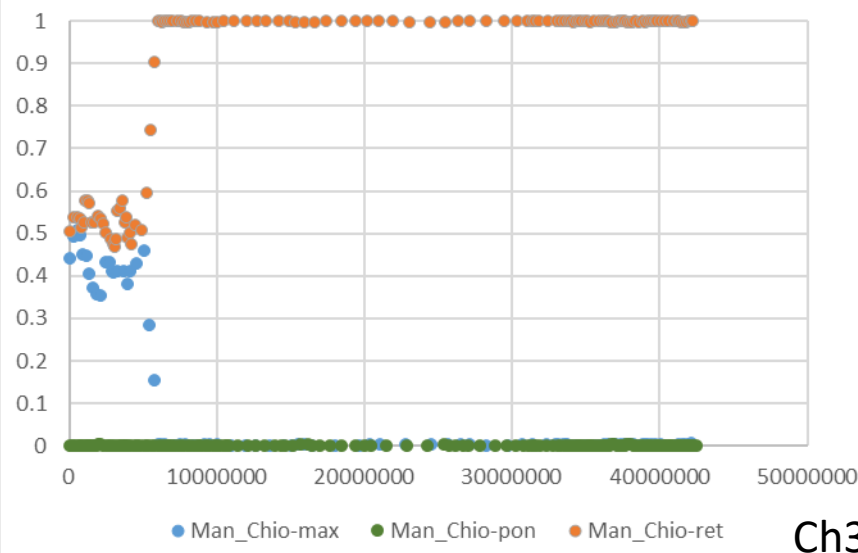

Ch3

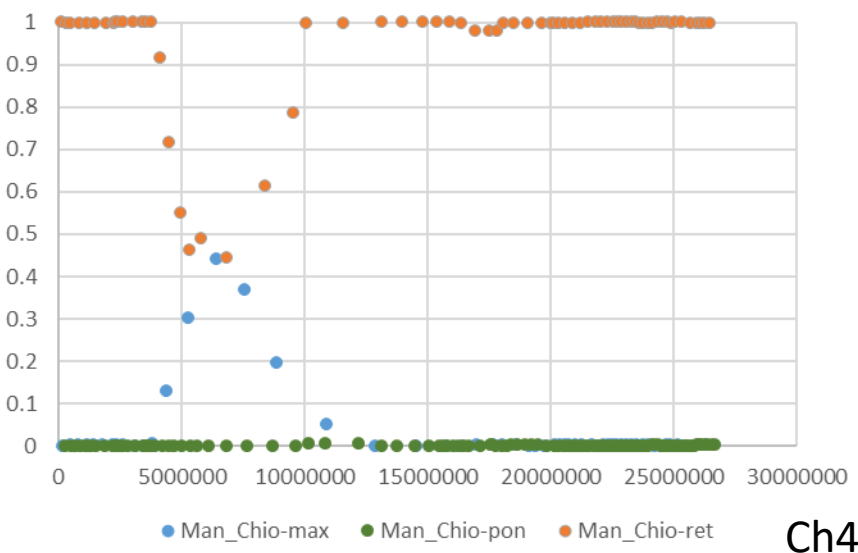

Ch4

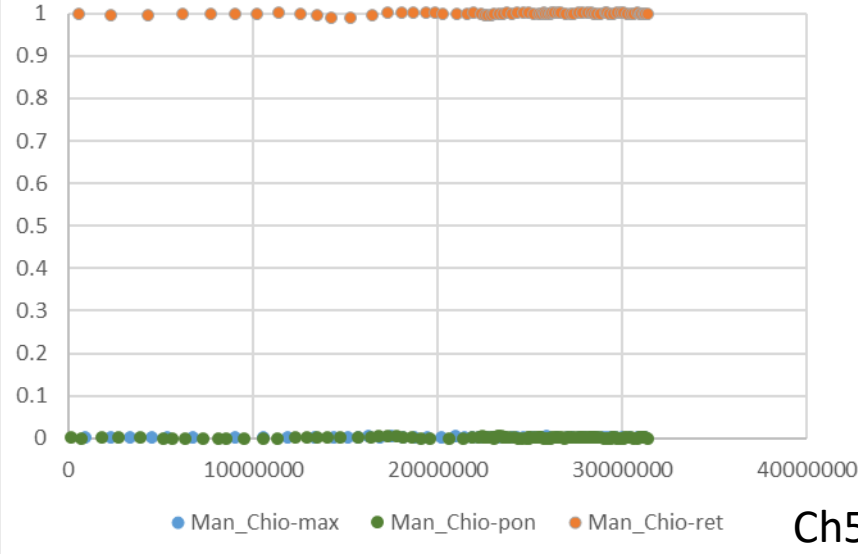

Ch5

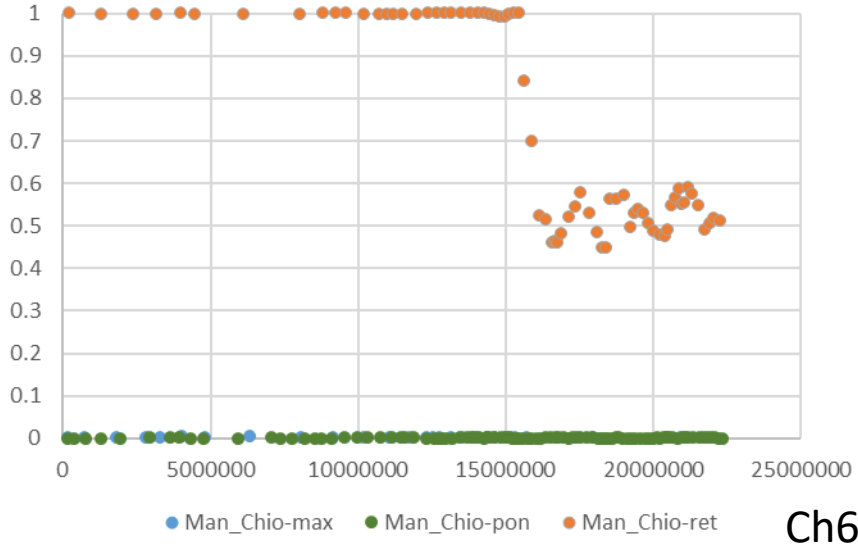

Ch6

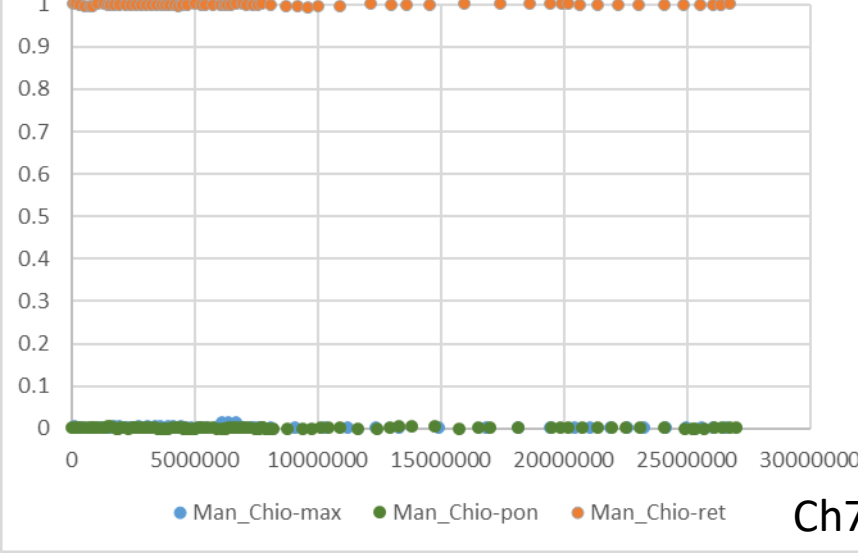

Ch7

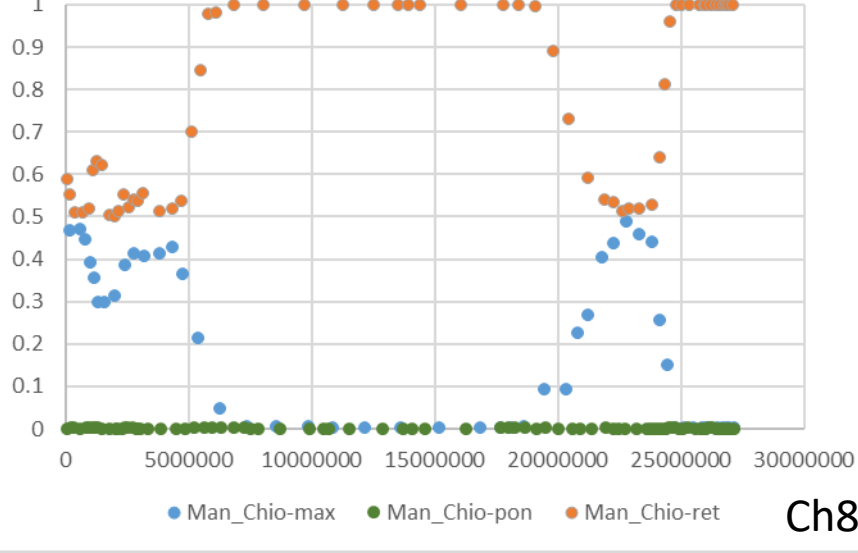

Ch8

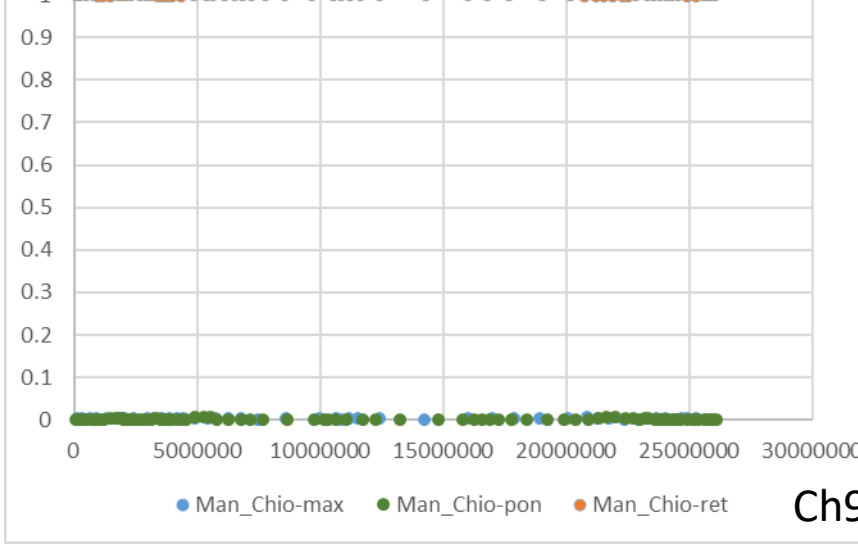

Ch9

Man\_Chios

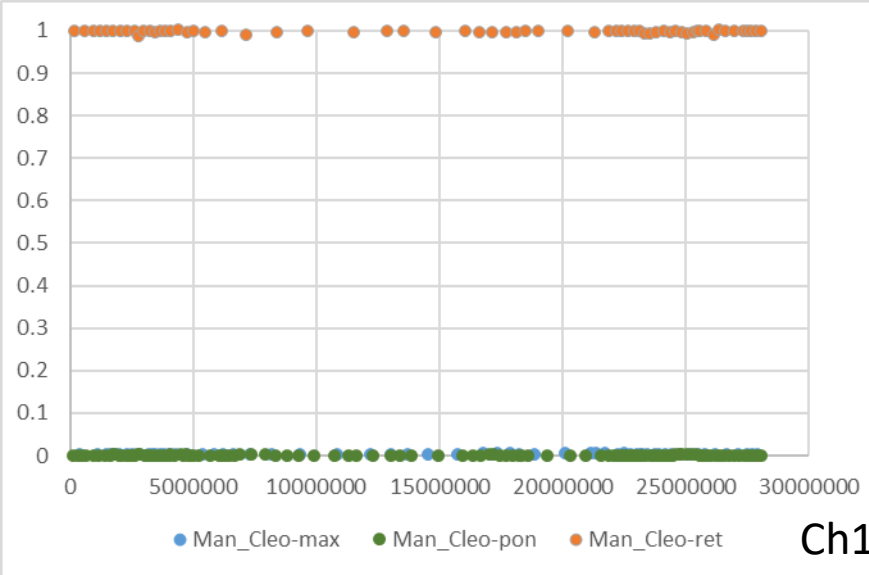

Ch1

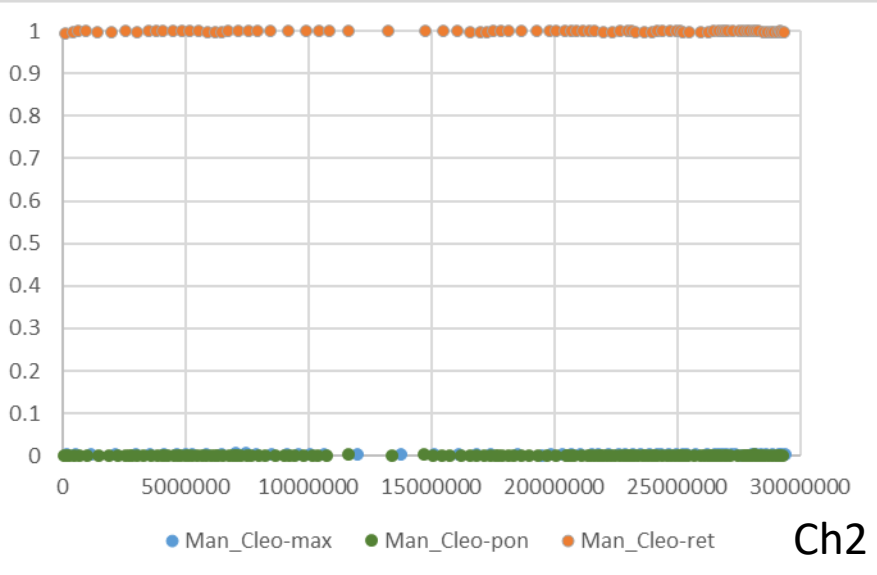

Ch2

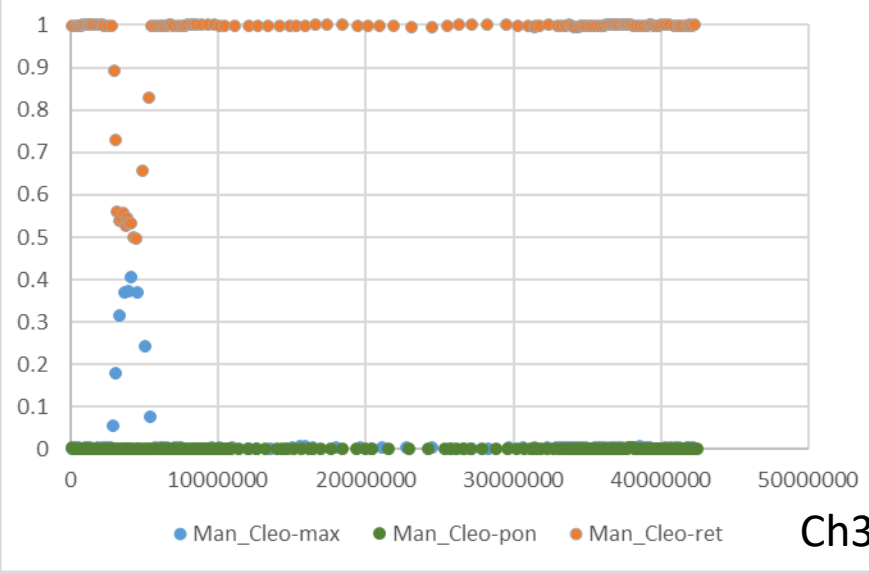

Ch3

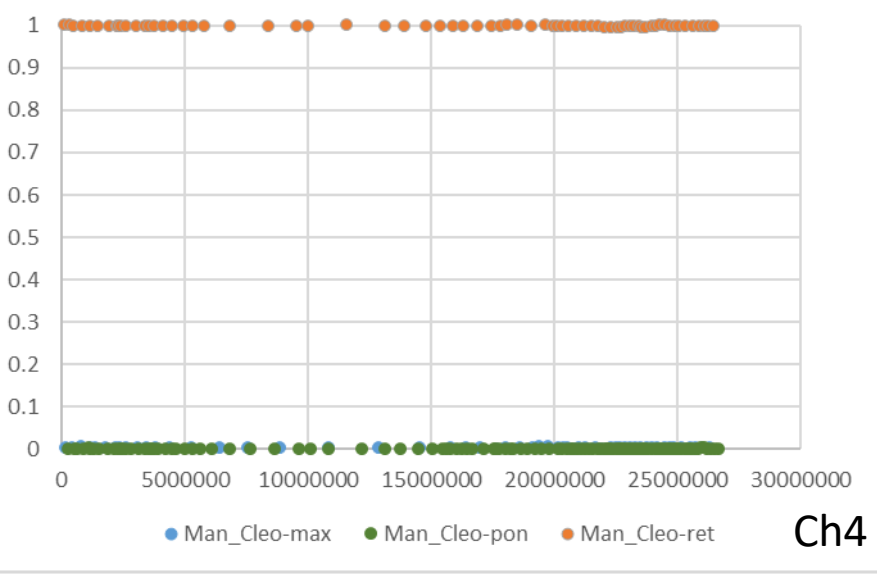

Ch4

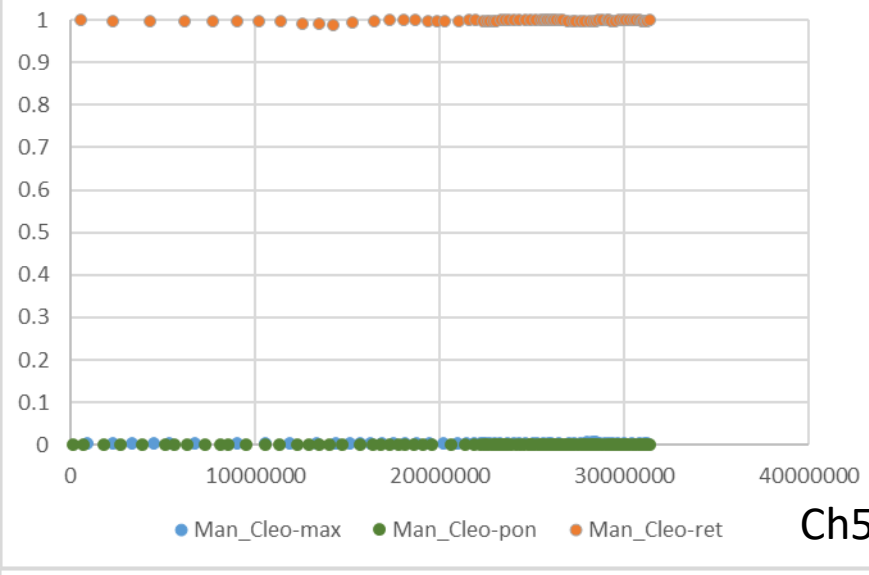

Ch5

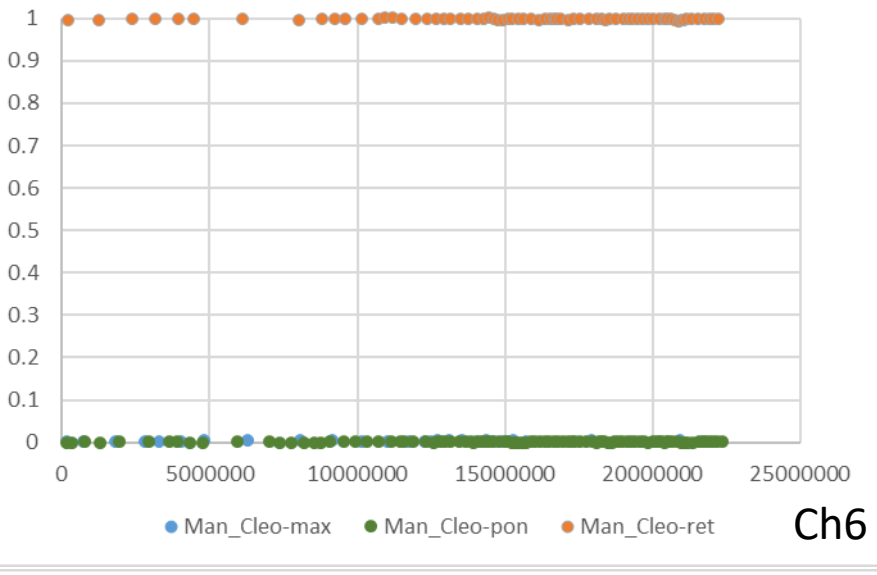

Ch6

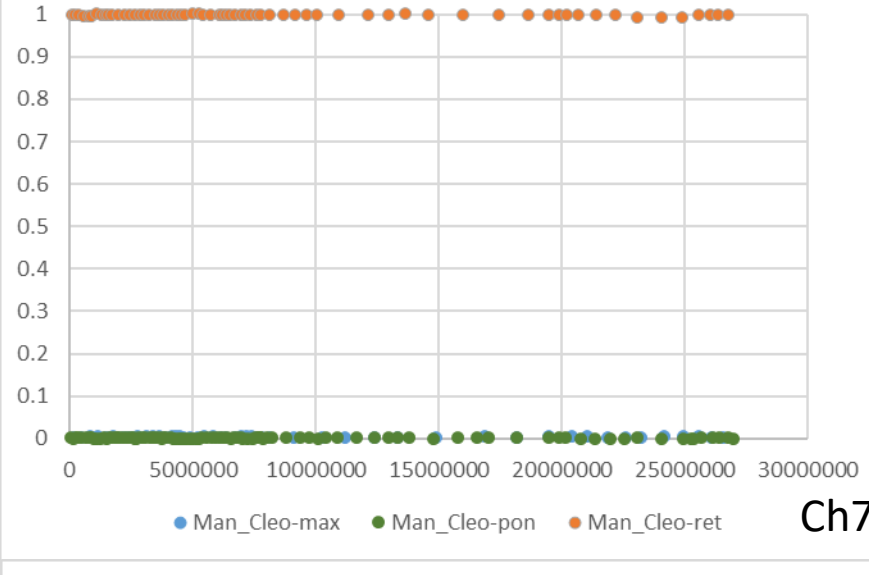

Ch7

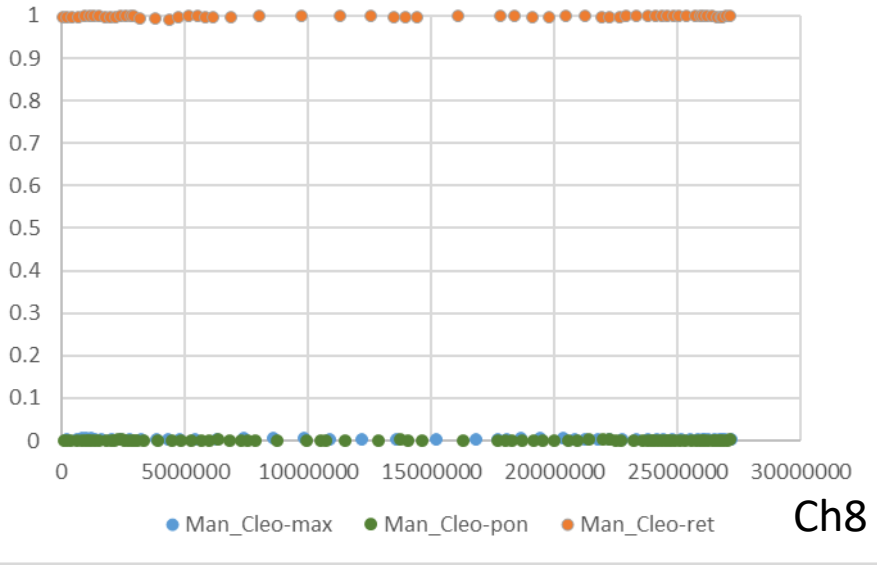

Ch8

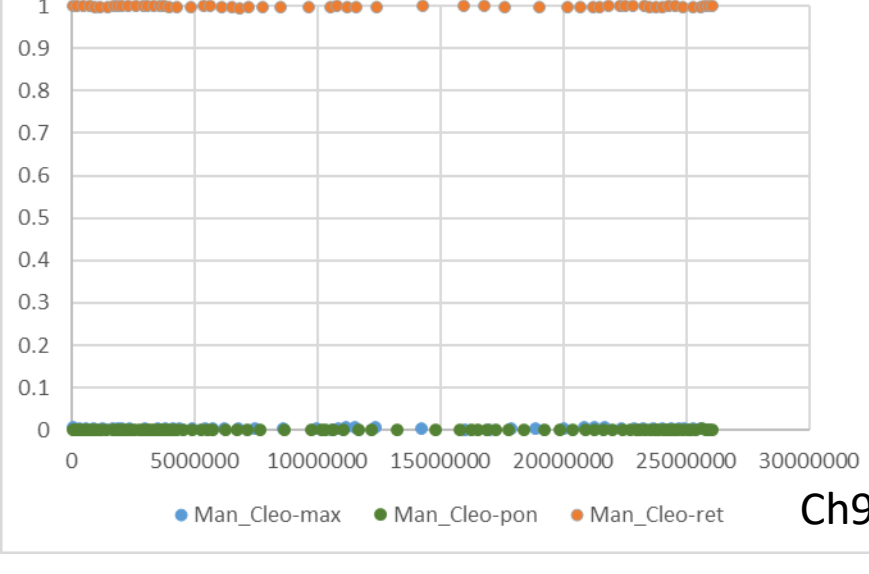

Ch9

Man\_Cleo

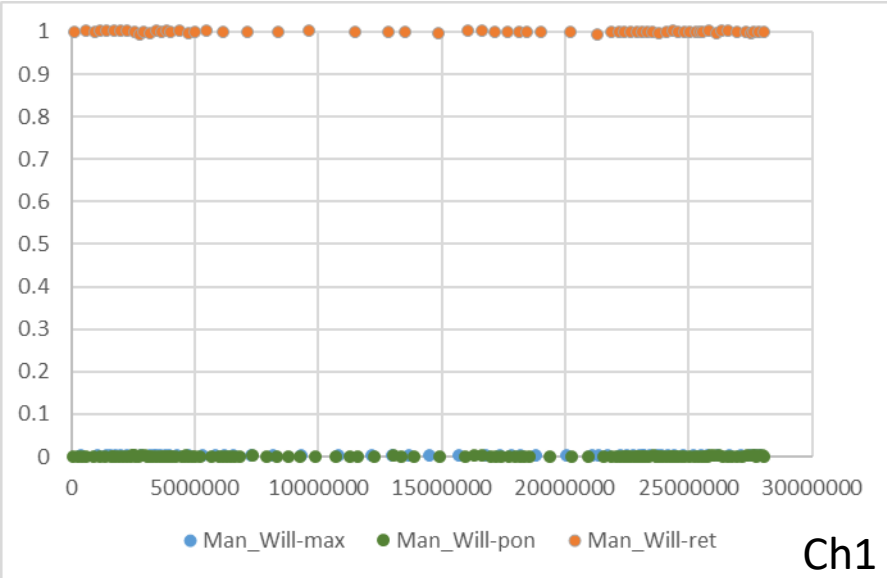

Ch1

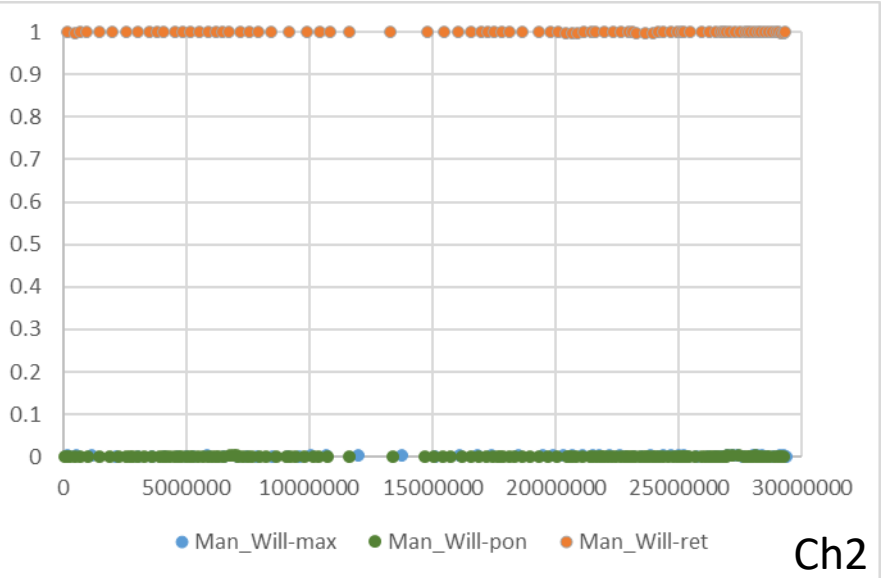

Ch2

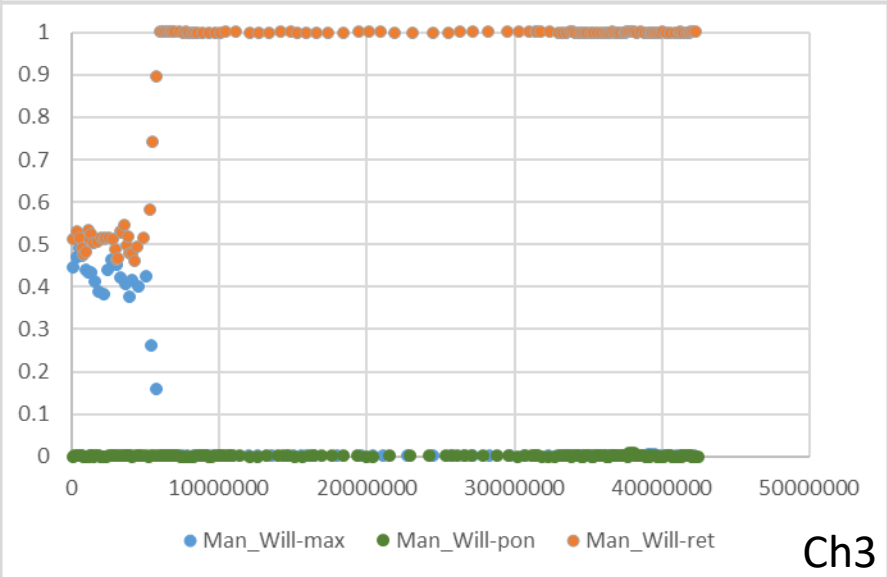

Ch3

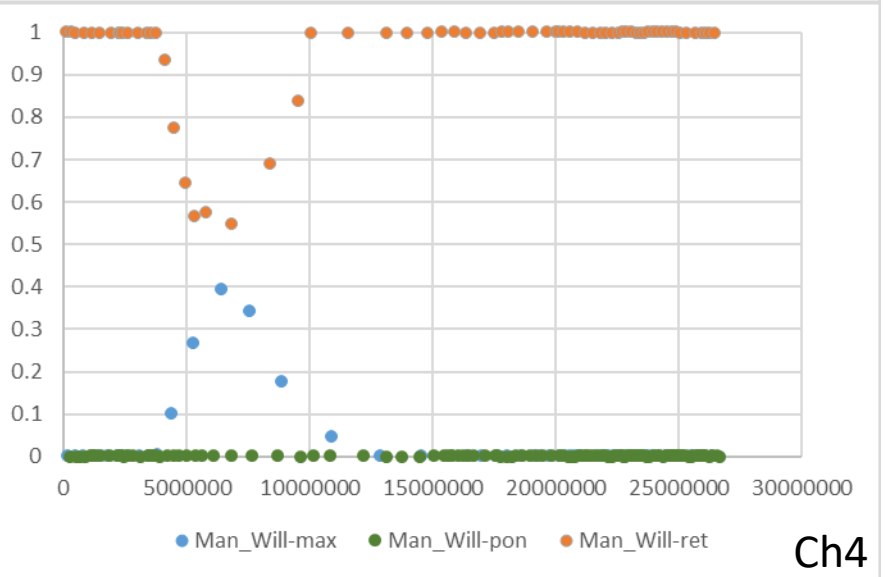

Ch4

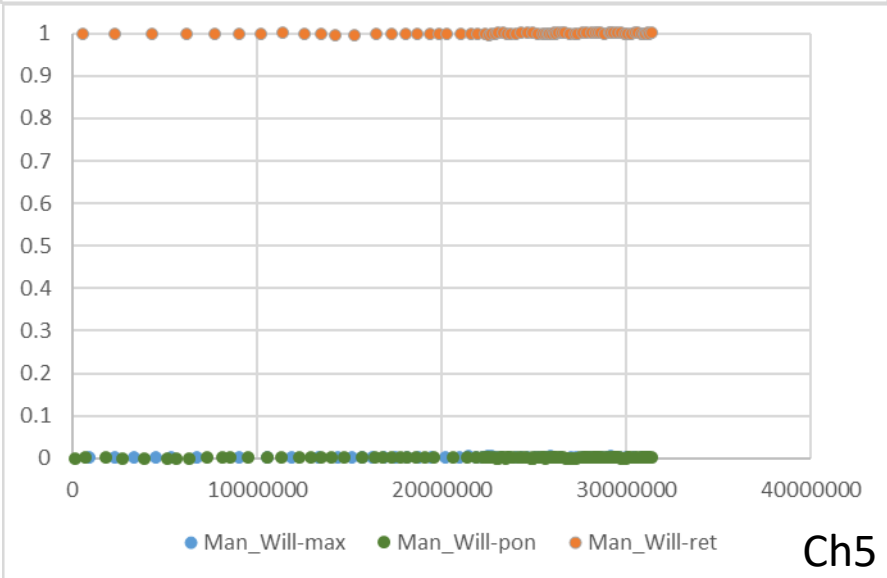

Ch5

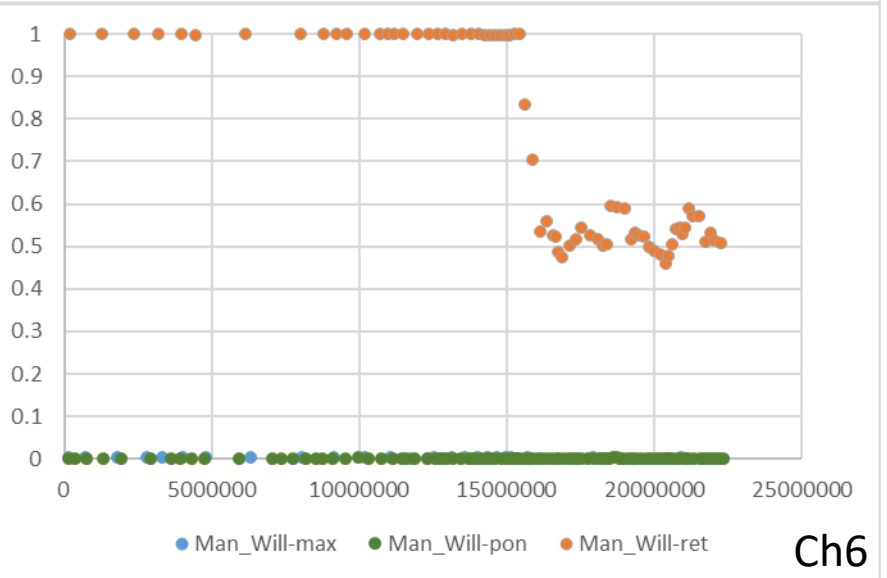

Ch6

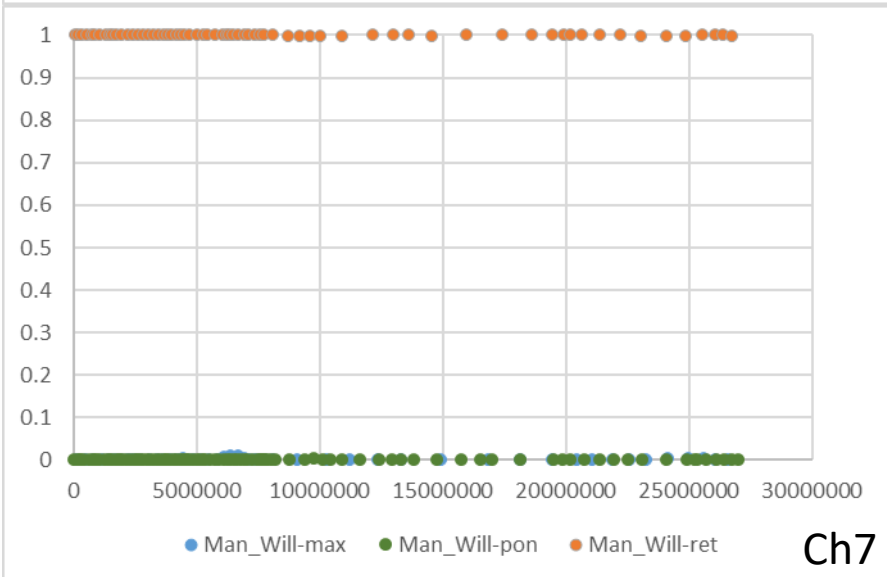

Ch7

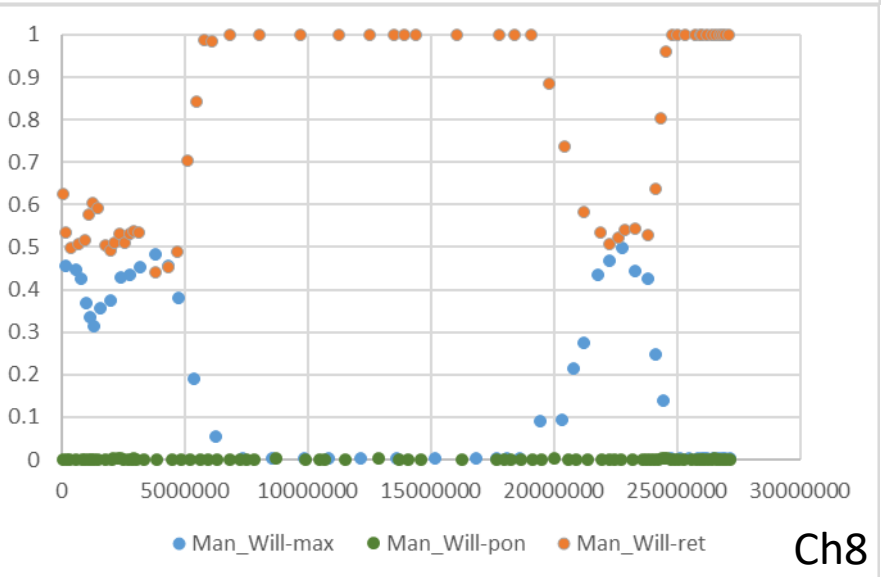

Ch8

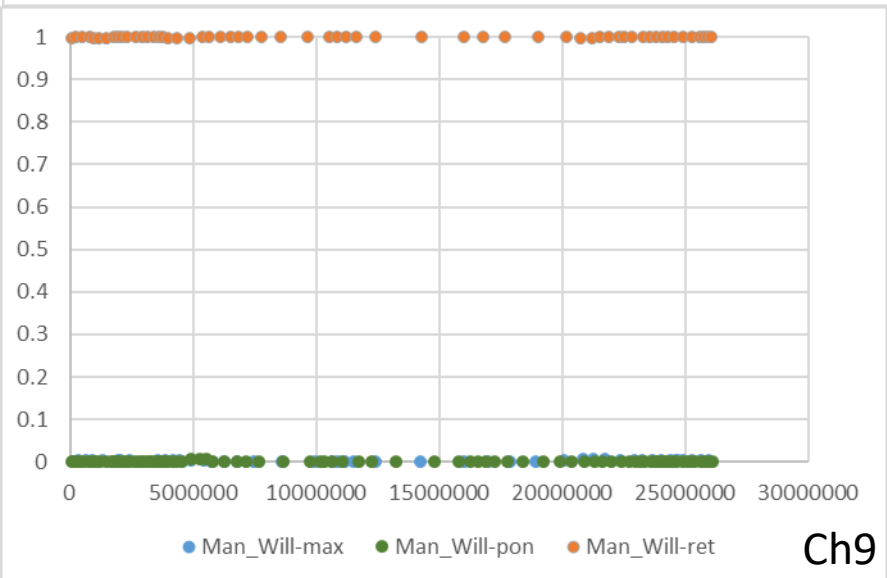

Ch9

Man\_Will

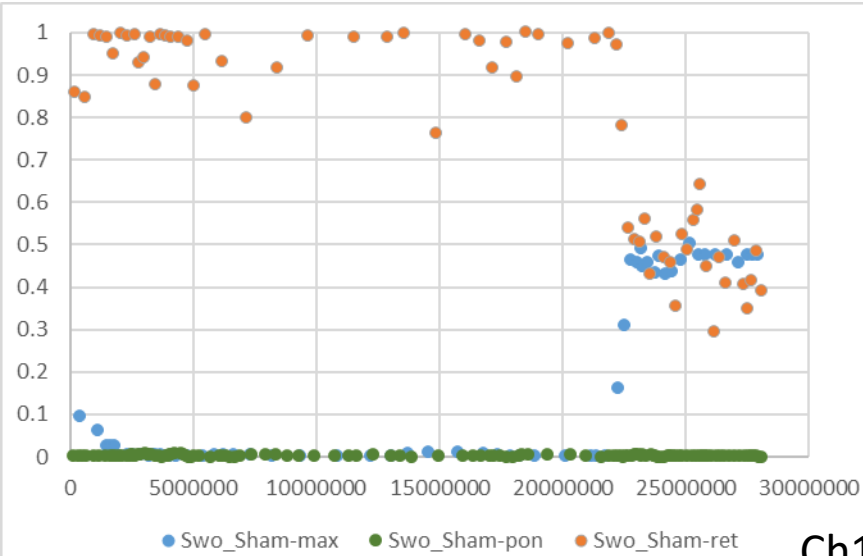

Ch1

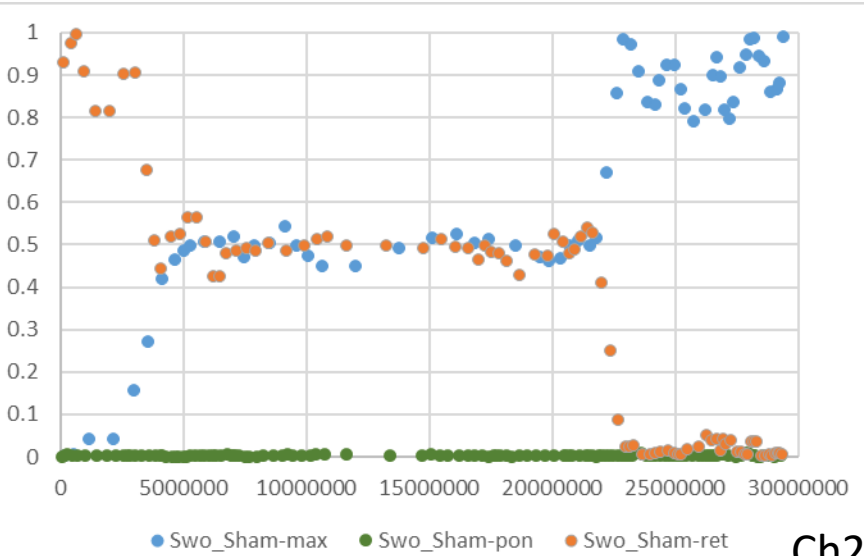

Ch2

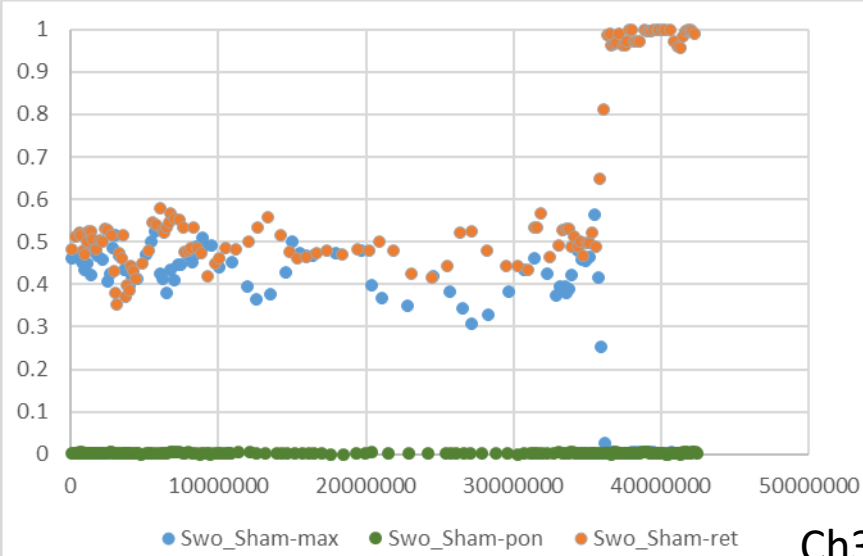

Ch3

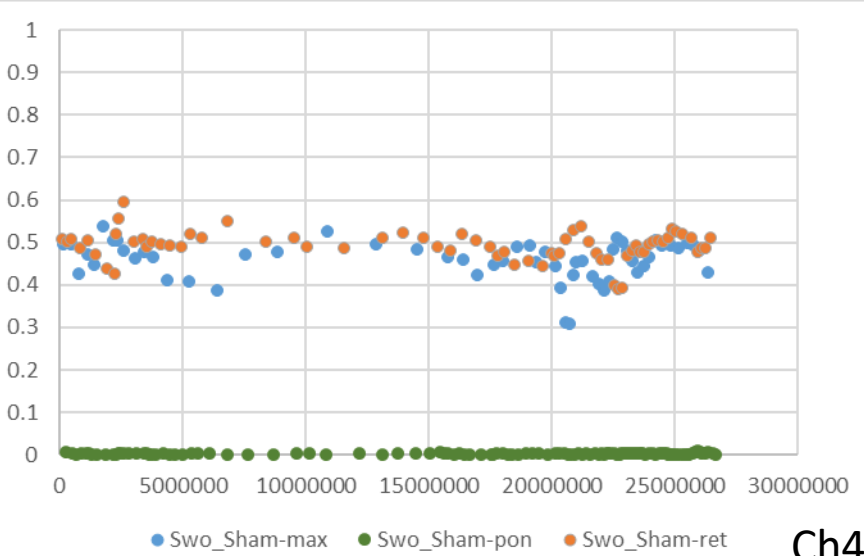

Ch4

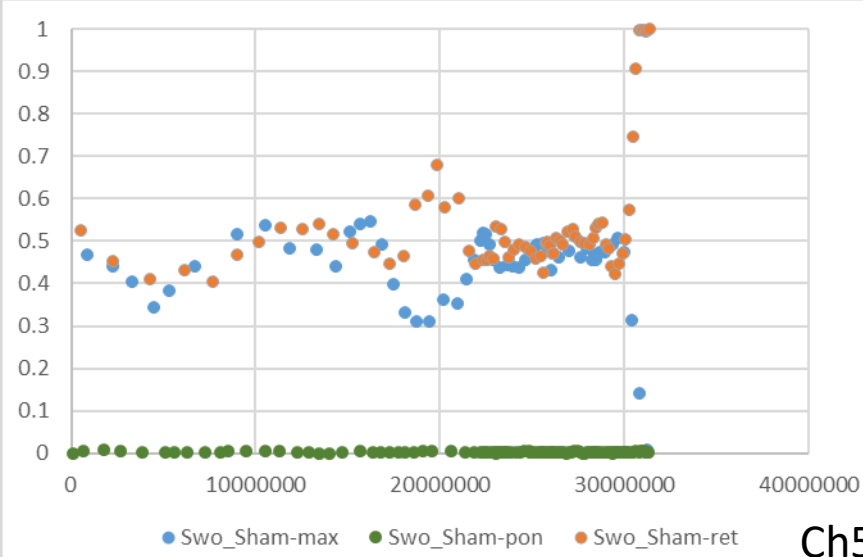

Ch5

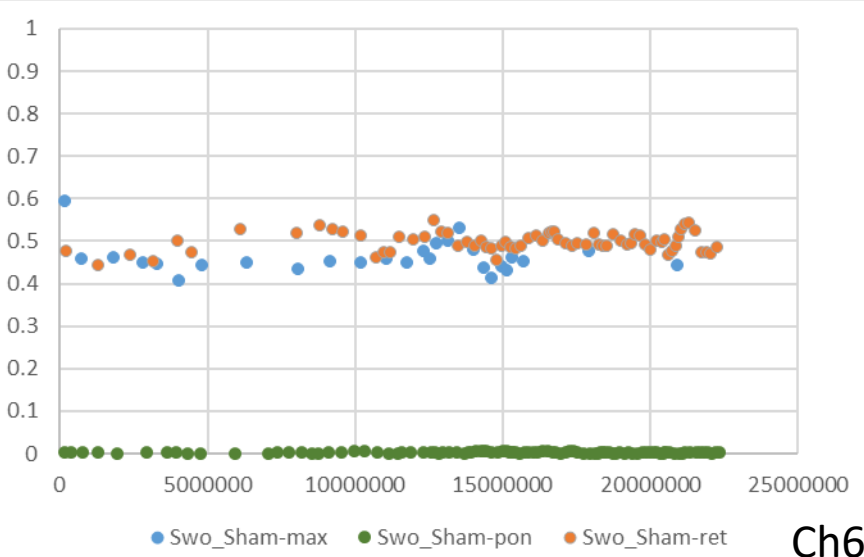

Ch6

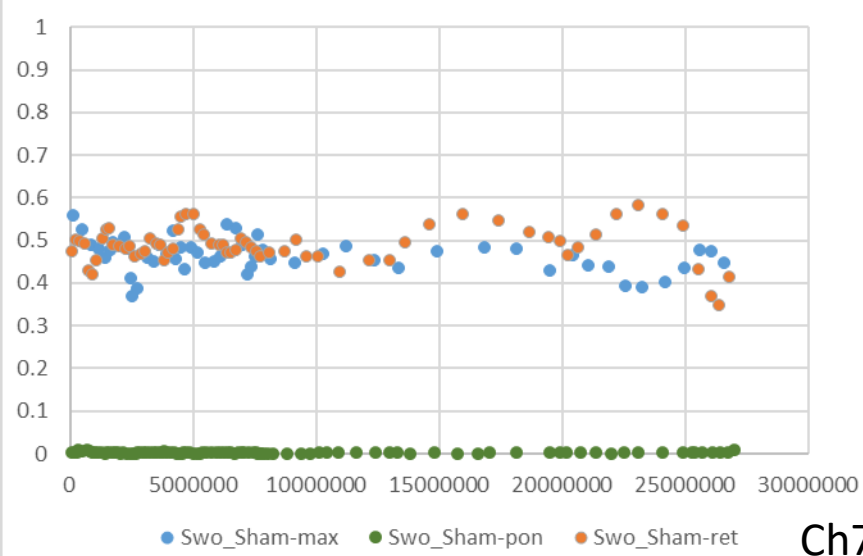

Ch7

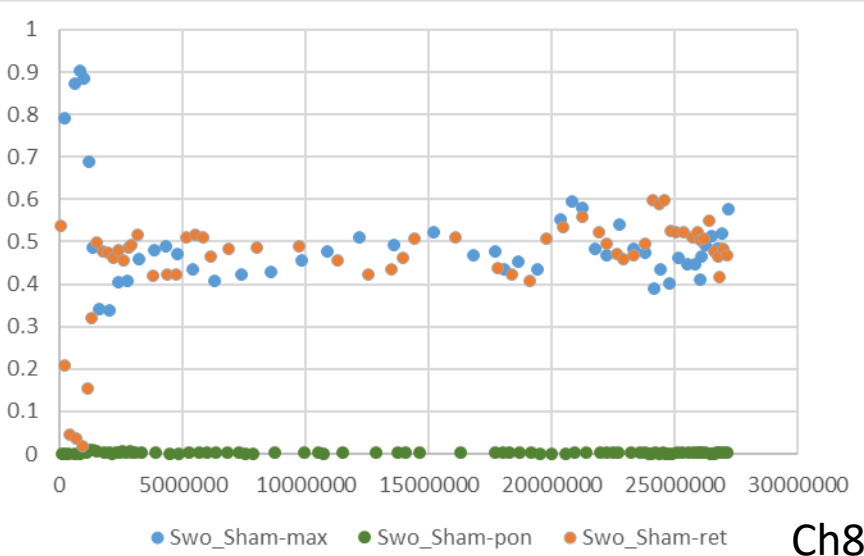

Ch8

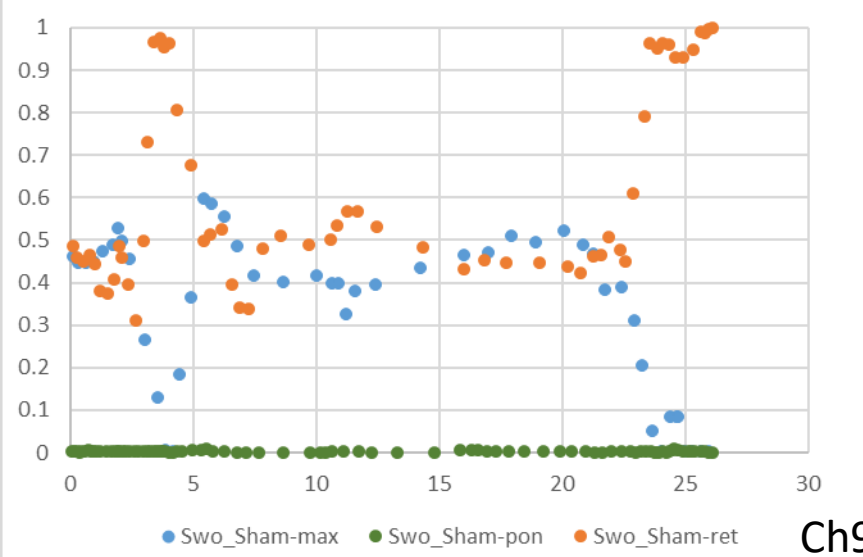

Ch9

Swo\_Sham

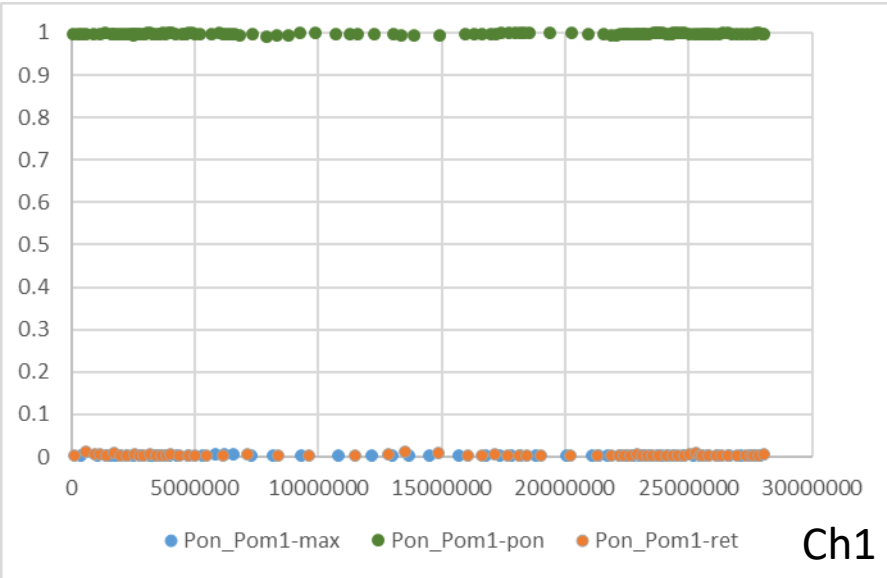

Ch1

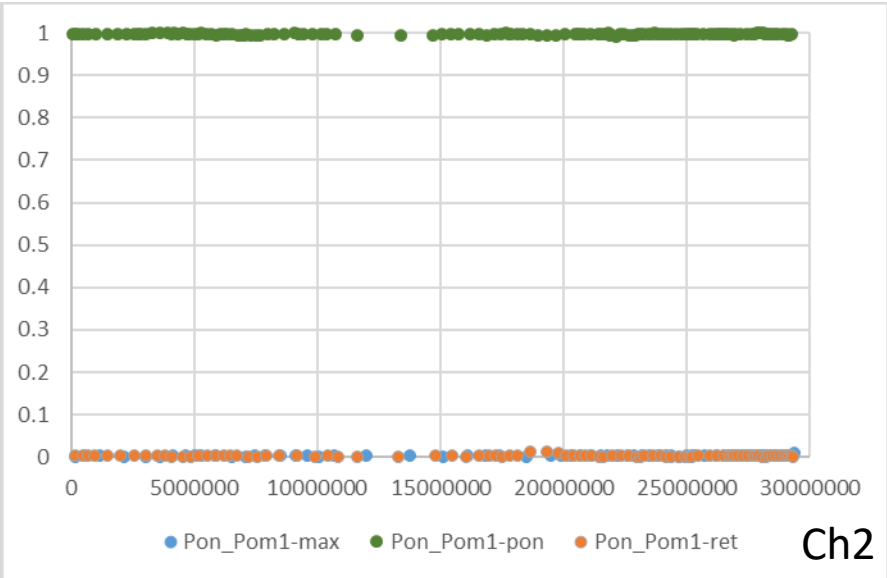

Ch2

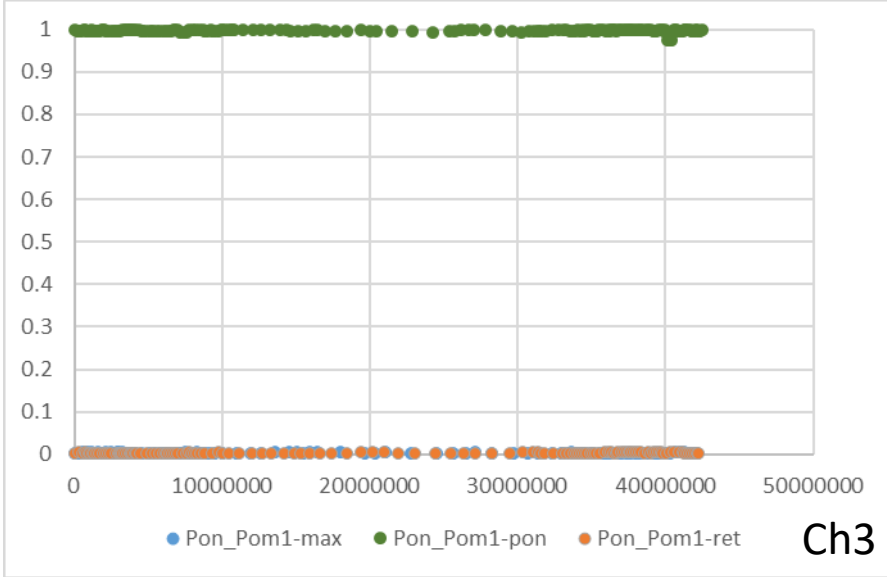

Ch3

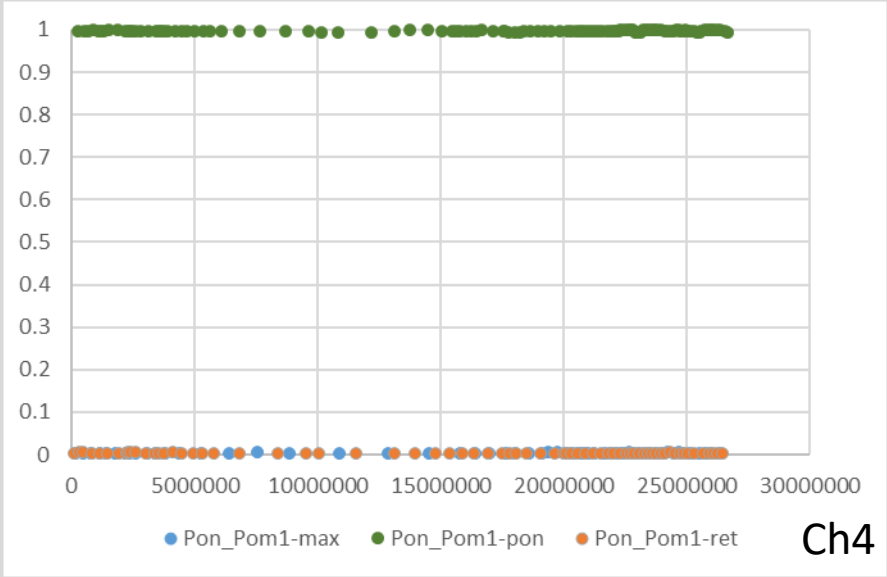

Ch4

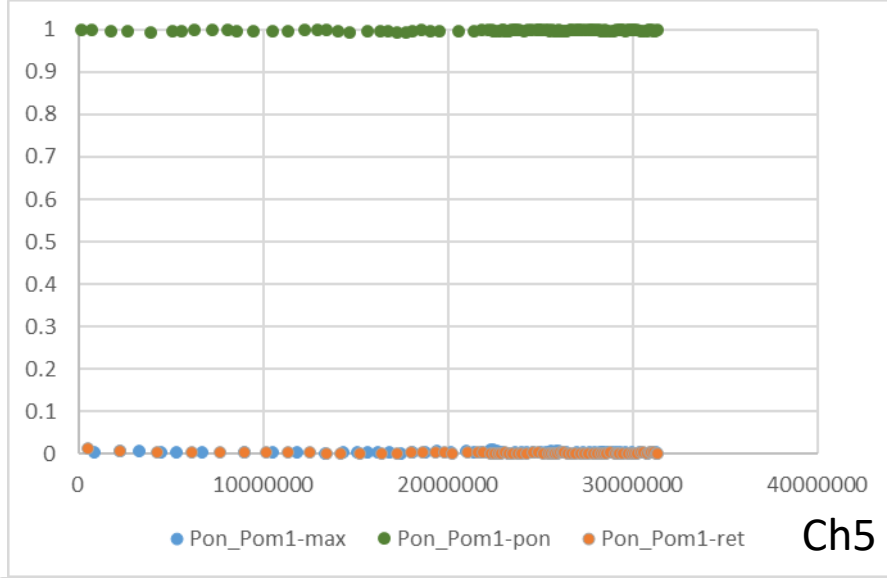

Ch5

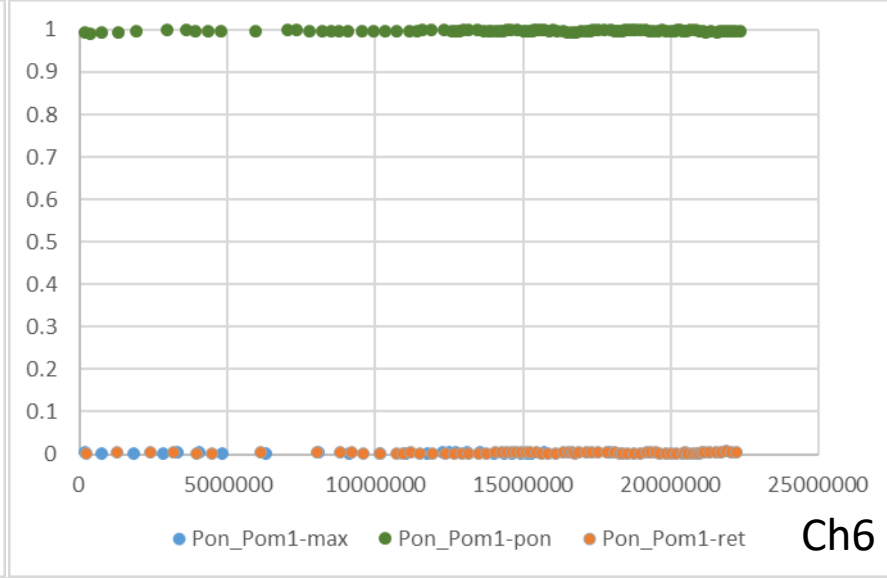

Ch6

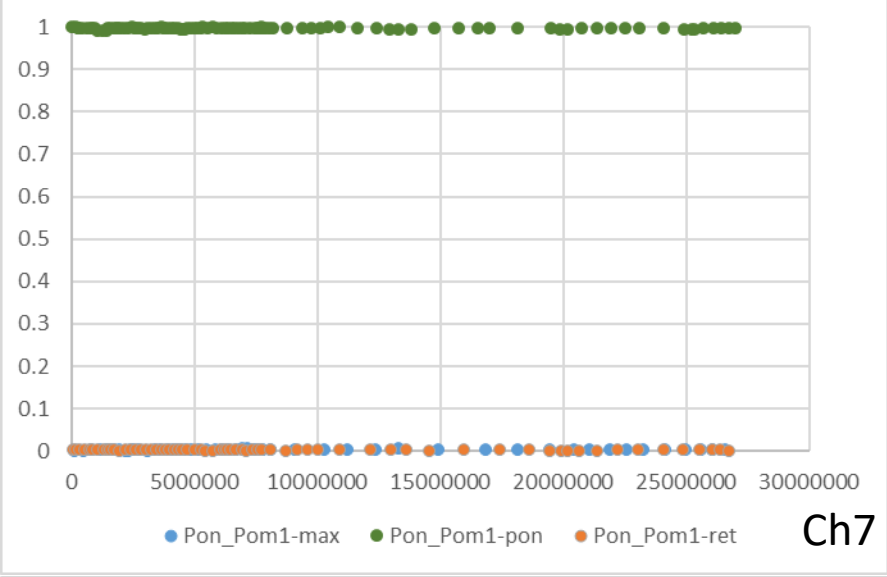

Ch7

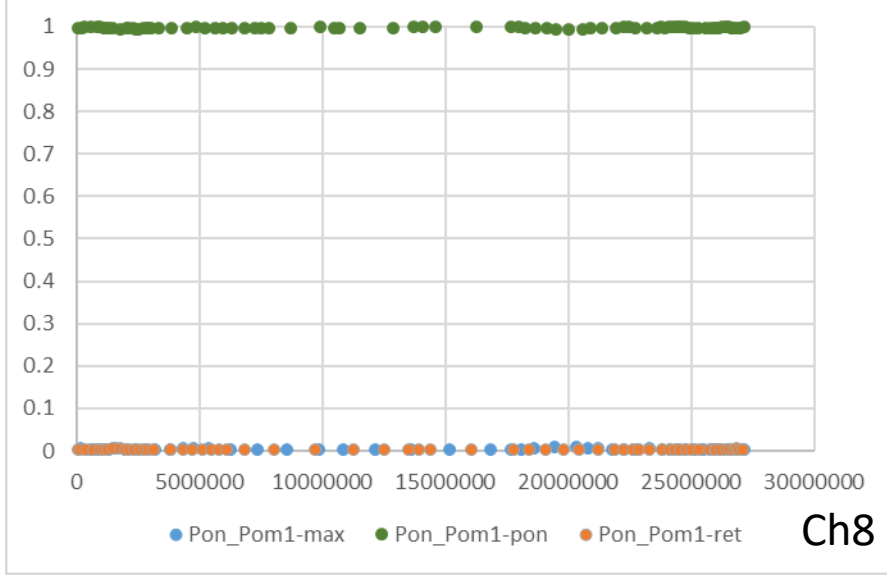

Ch8

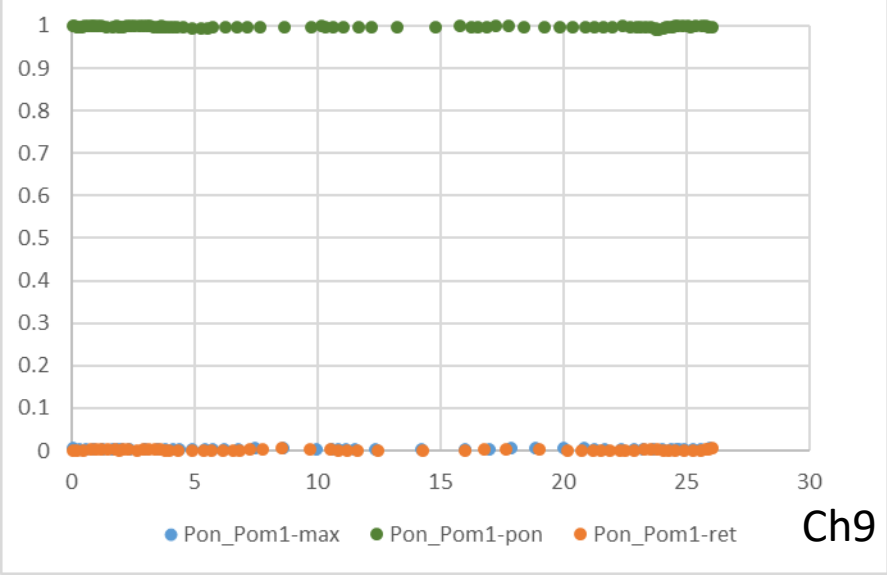

Ch9

Pon\_Pom

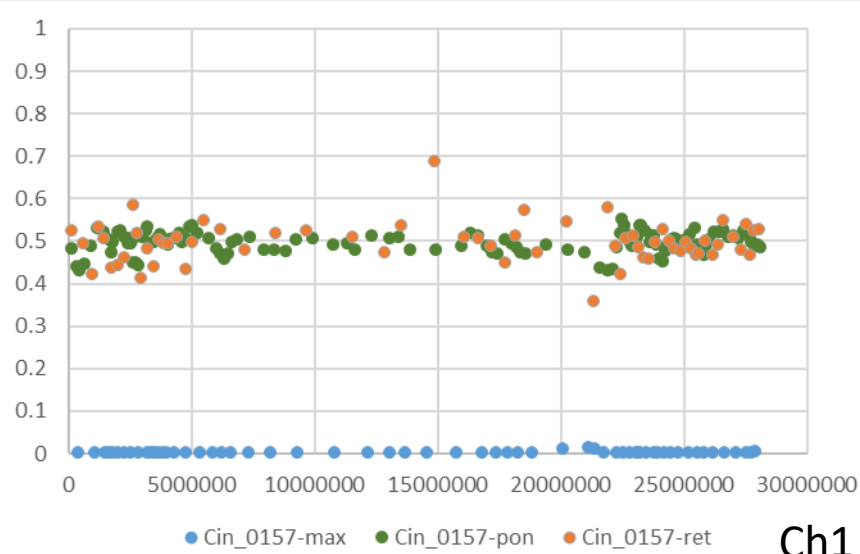

Ch1

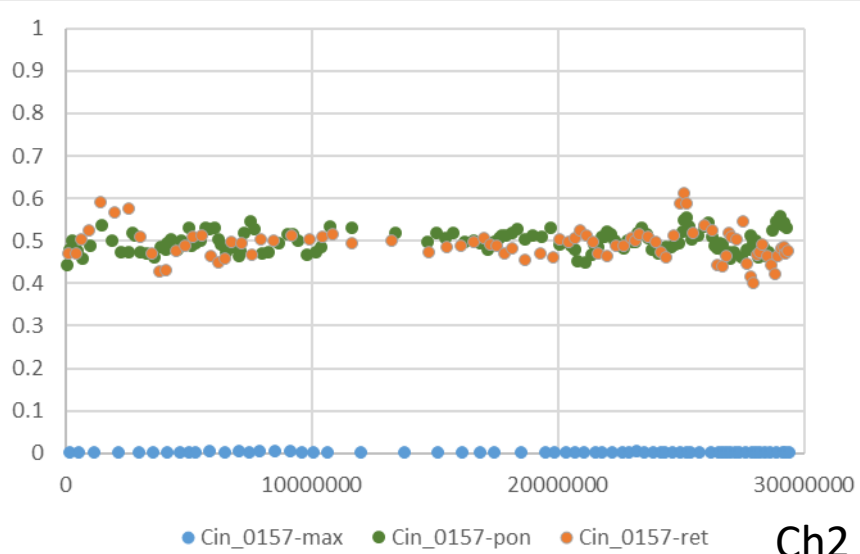

Ch2

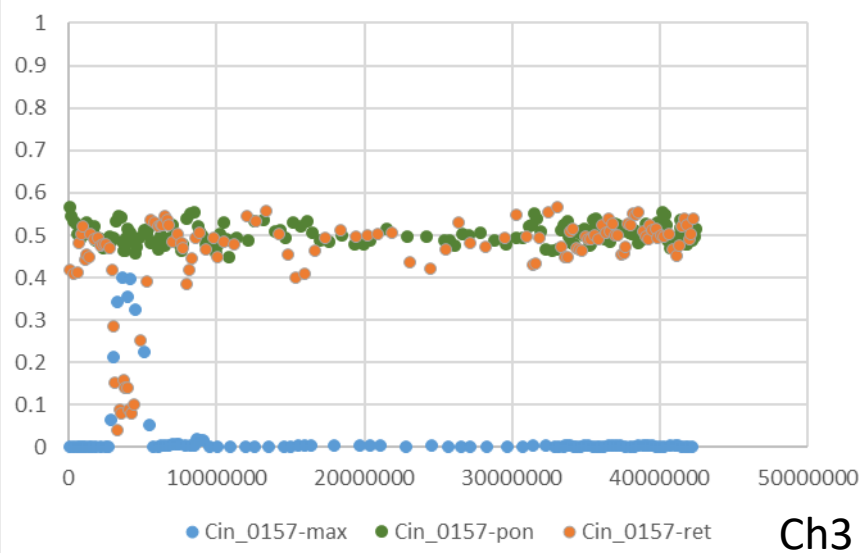

Ch3

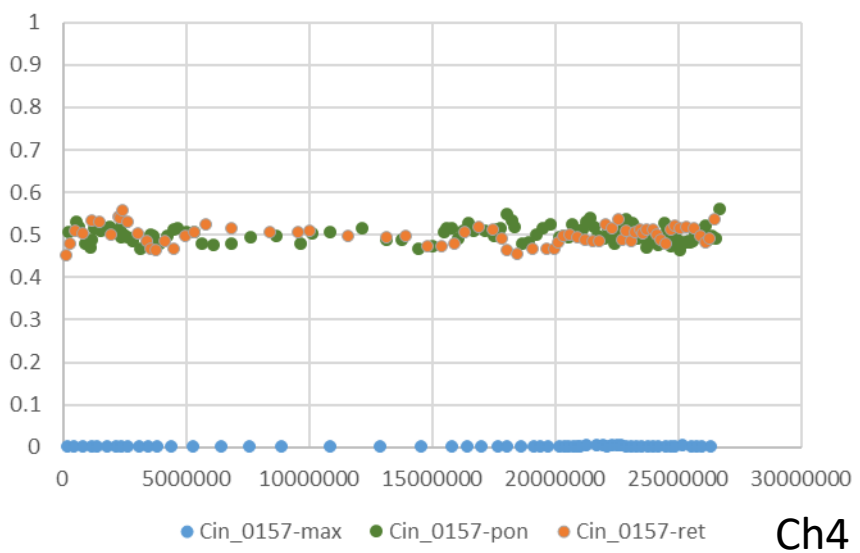

Ch4

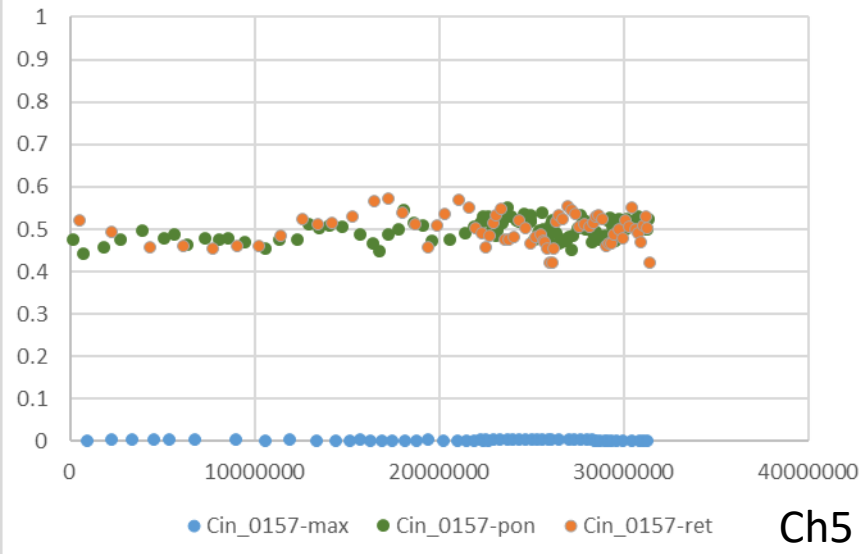

Ch5

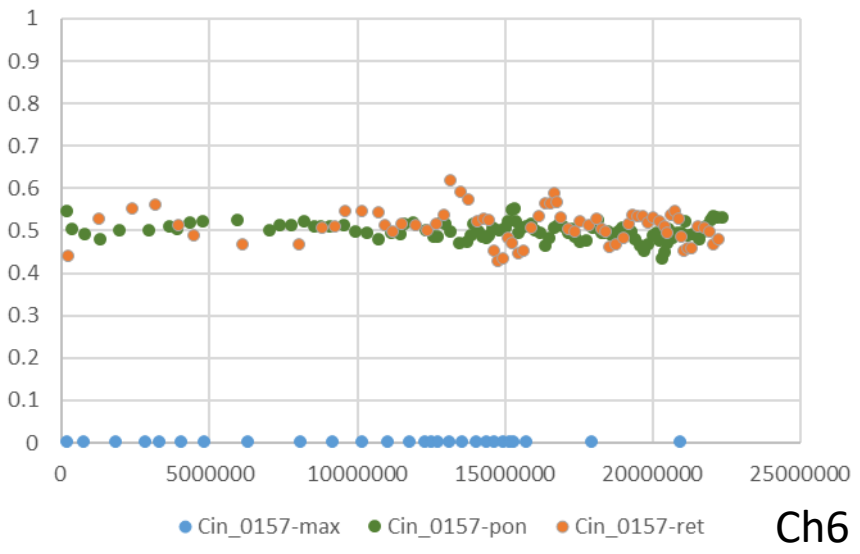

Ch6

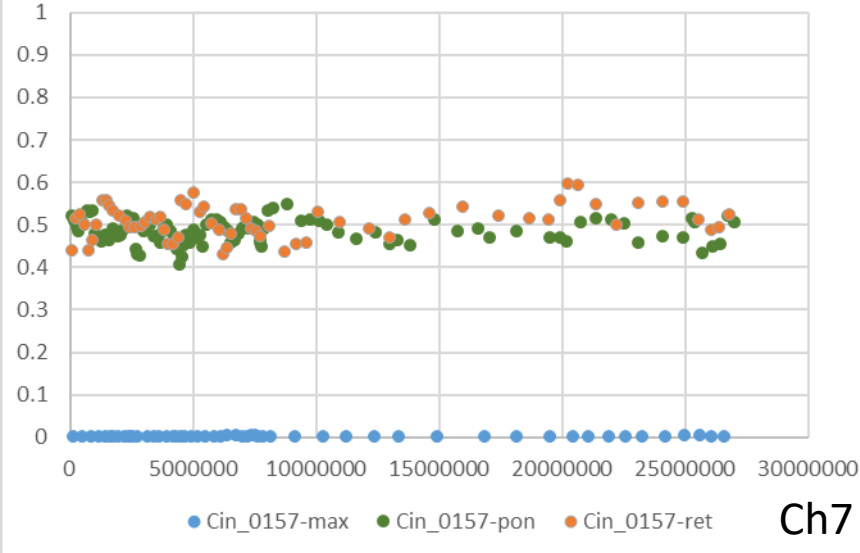

Ch7

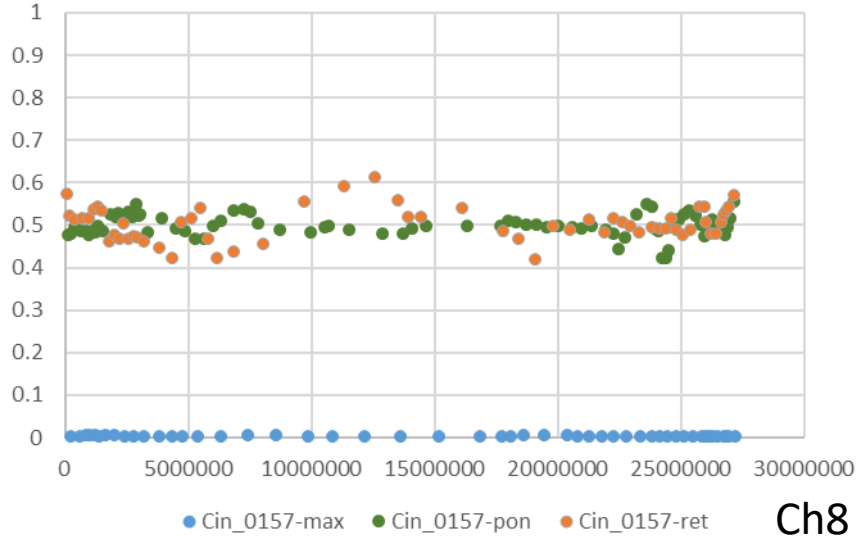

Ch8

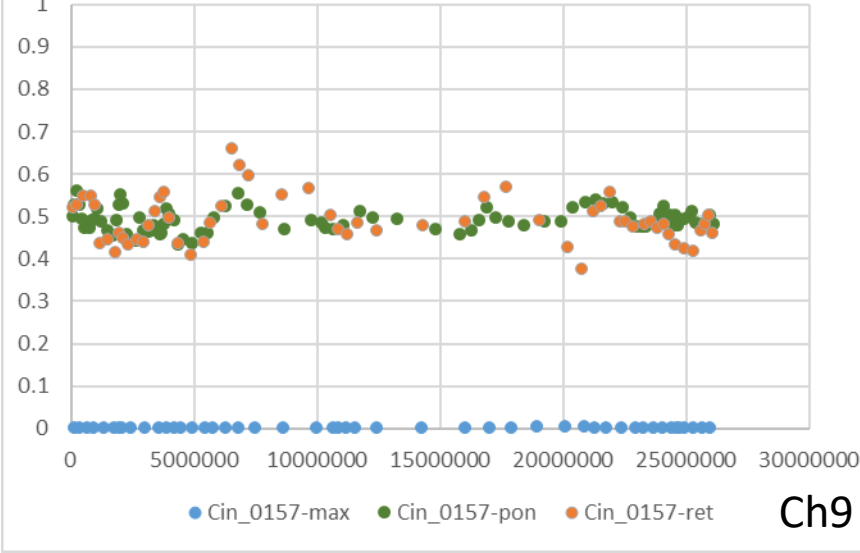

Ch9

Cin\_0157



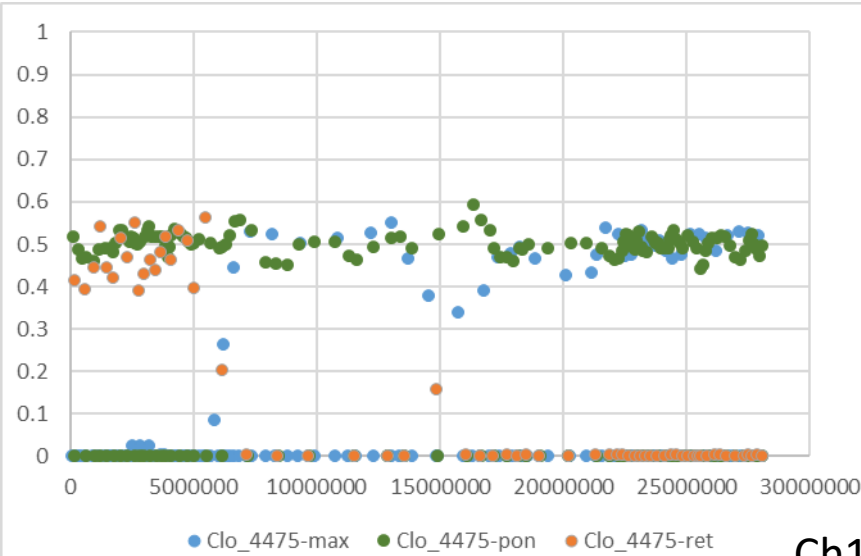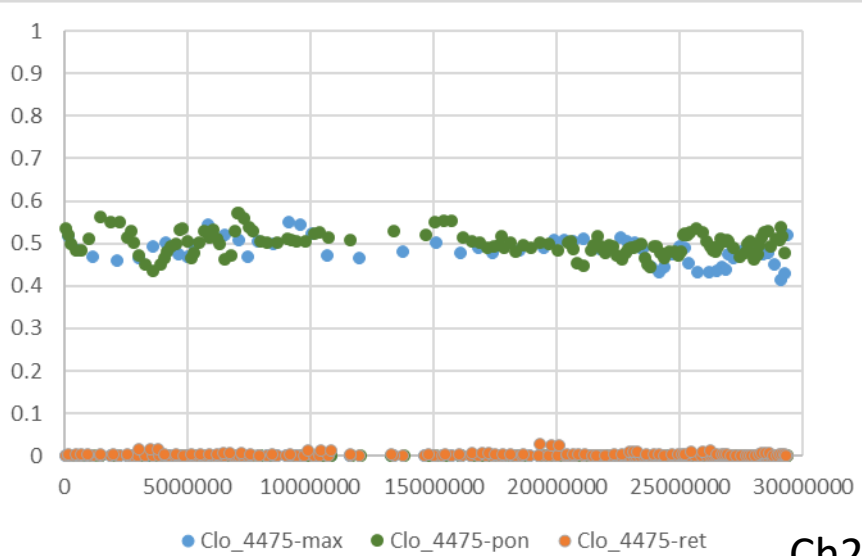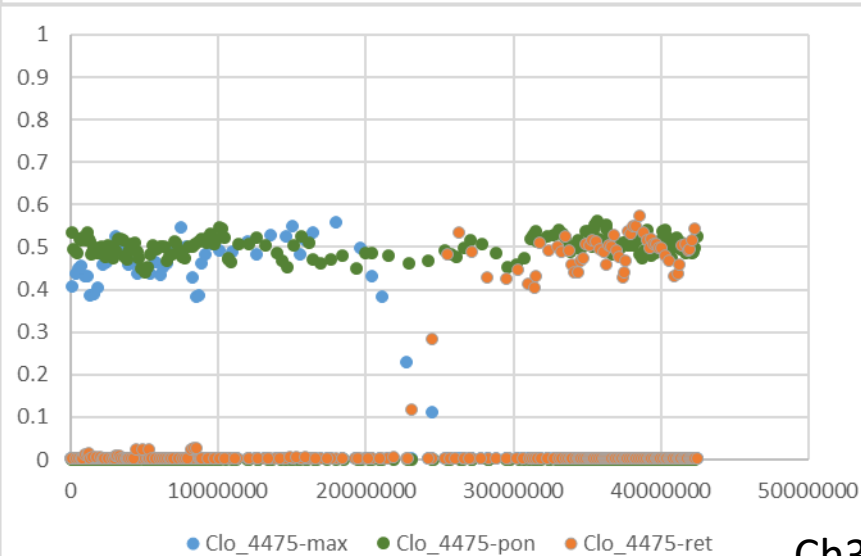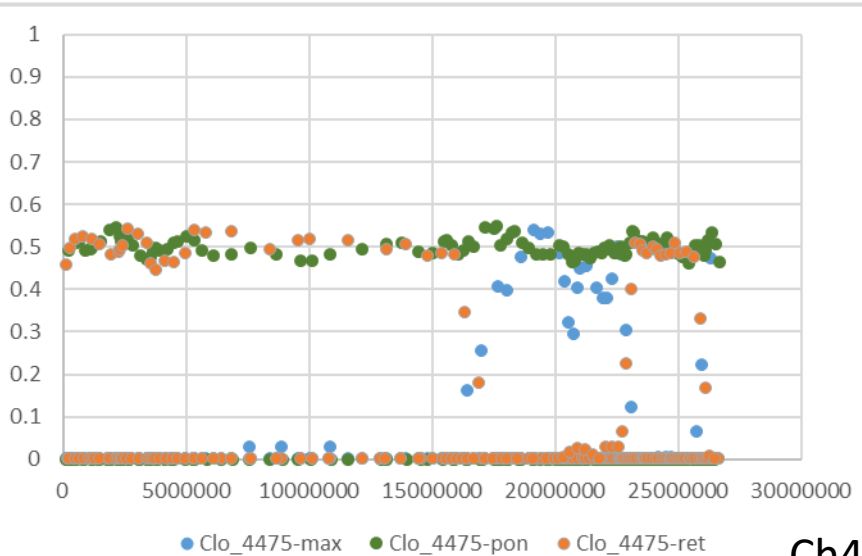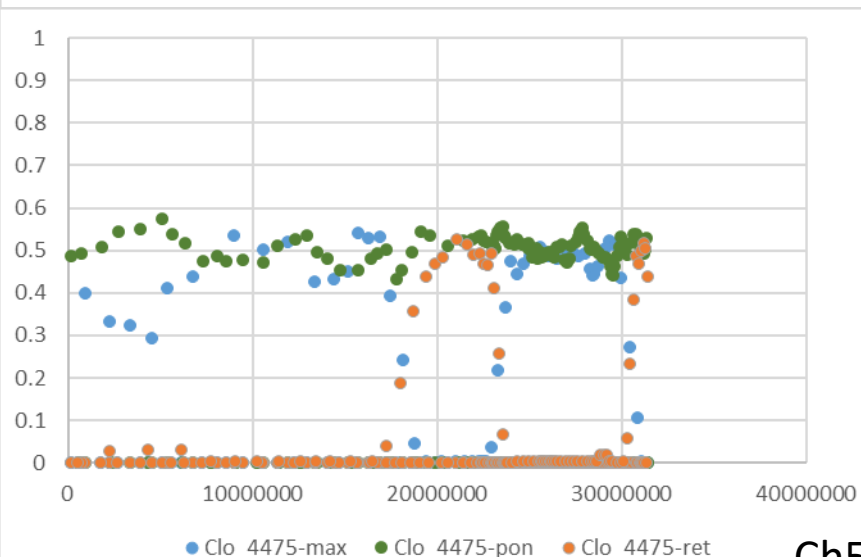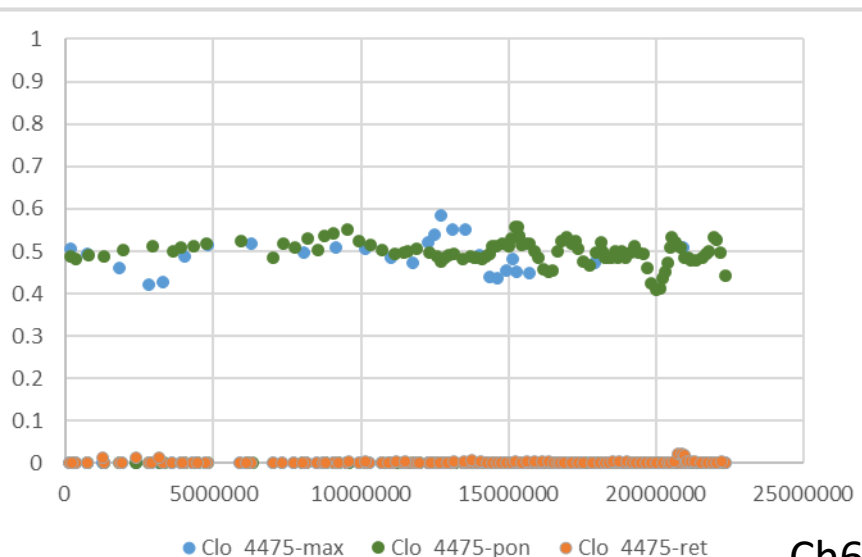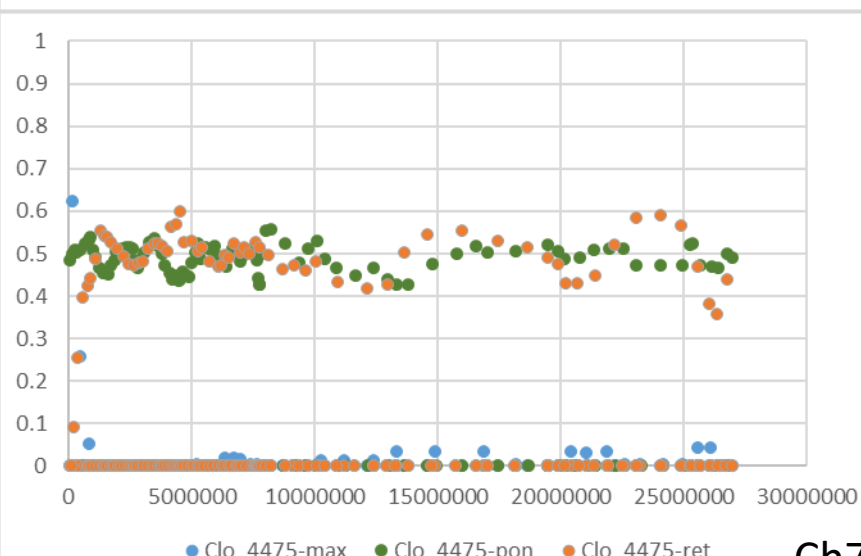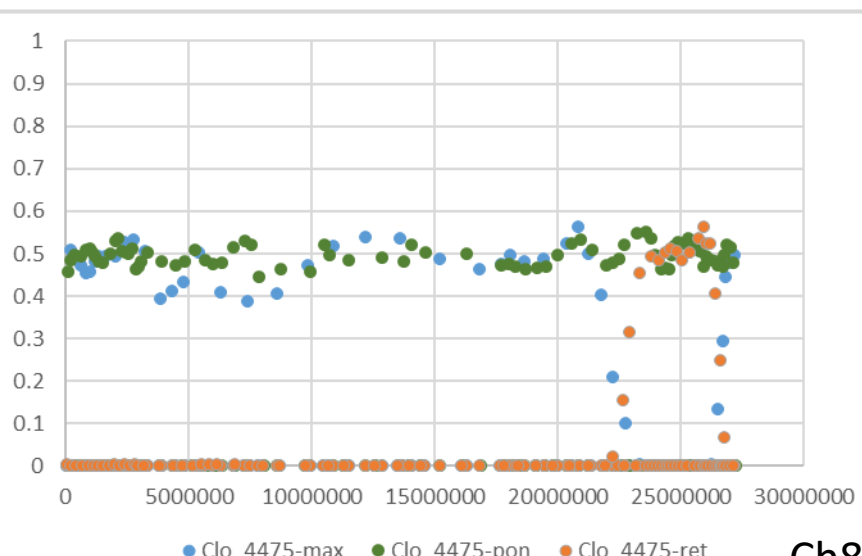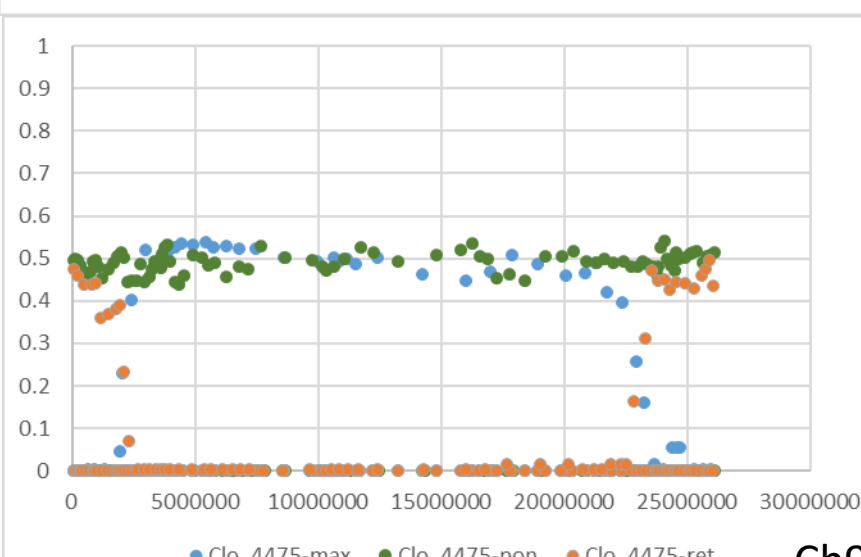

Clo\_4475



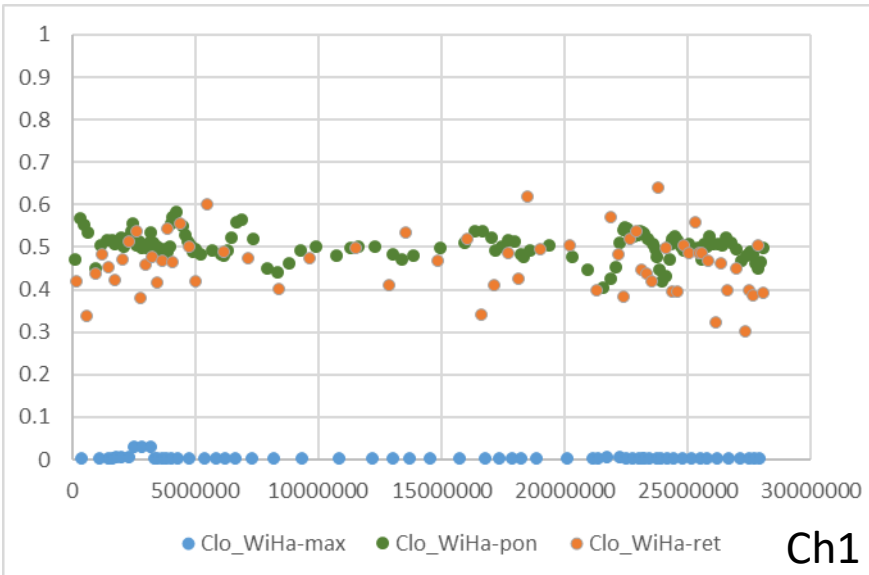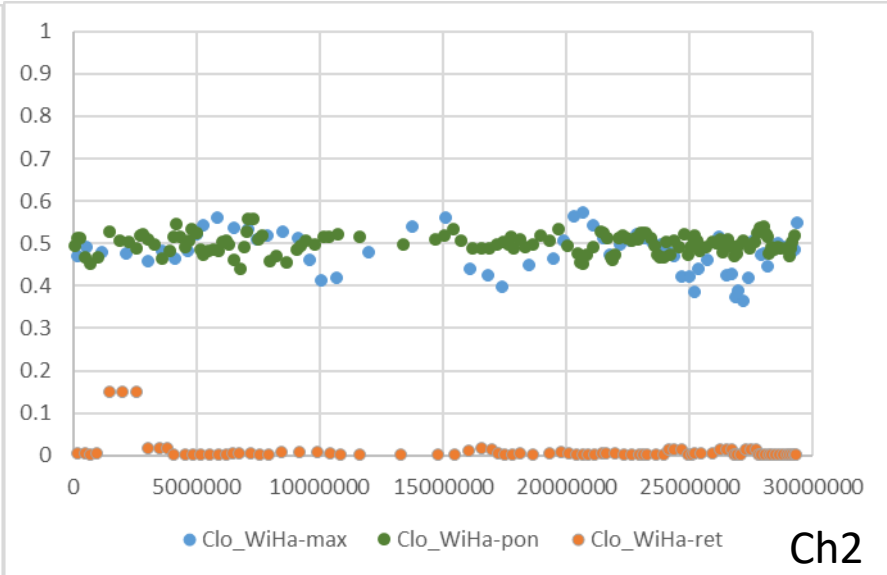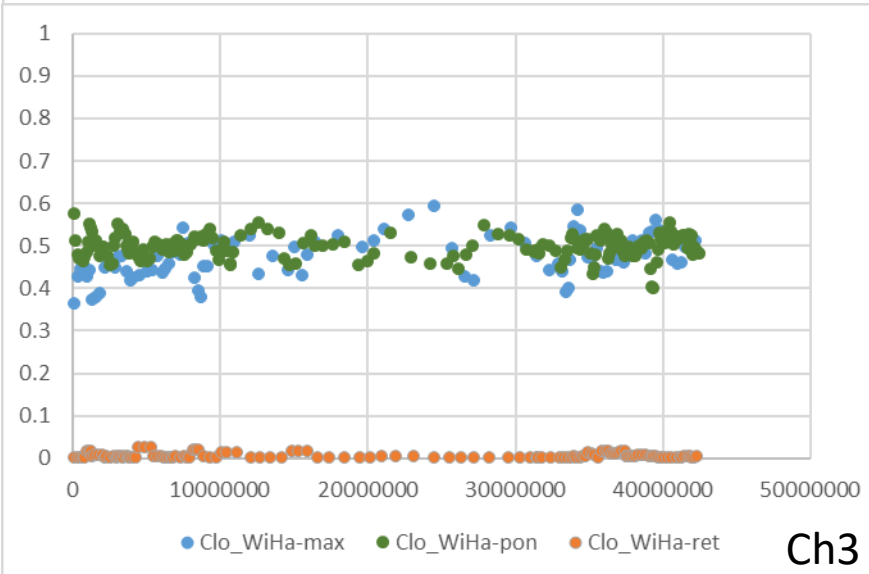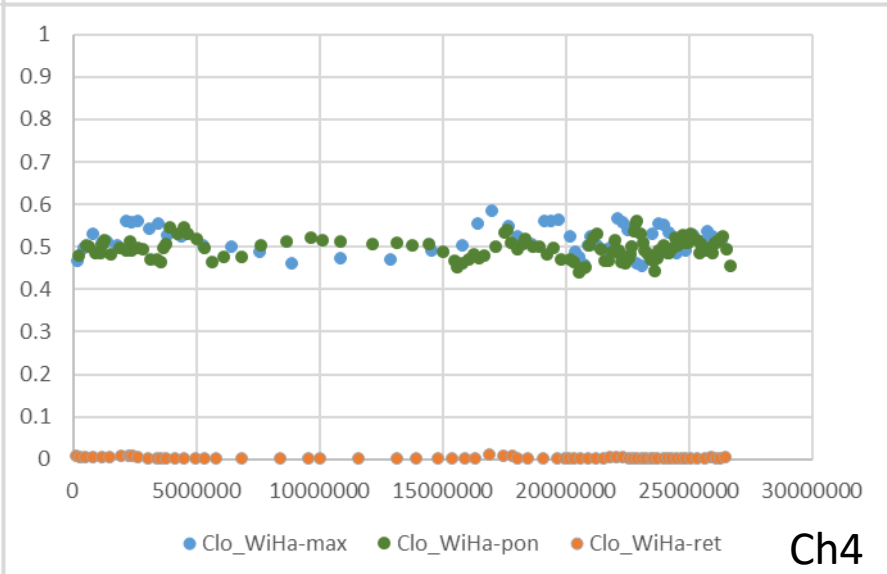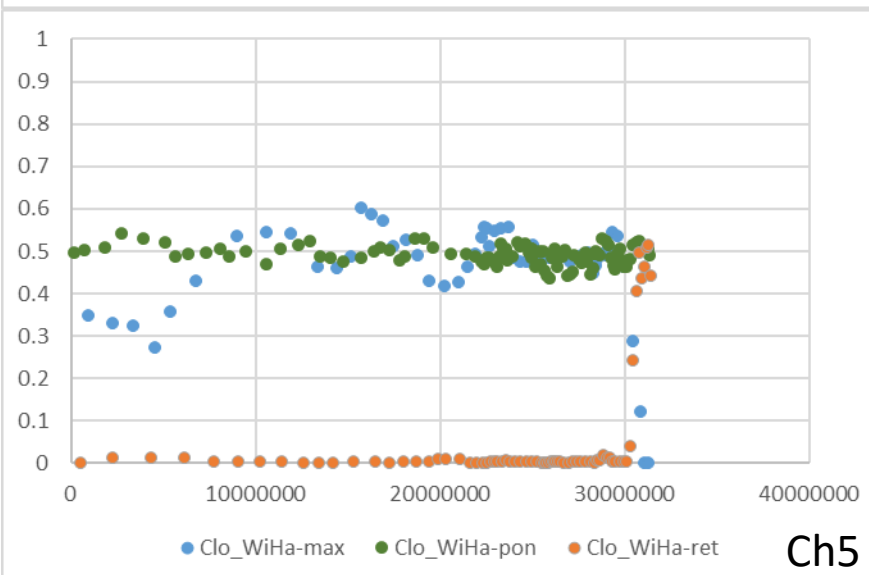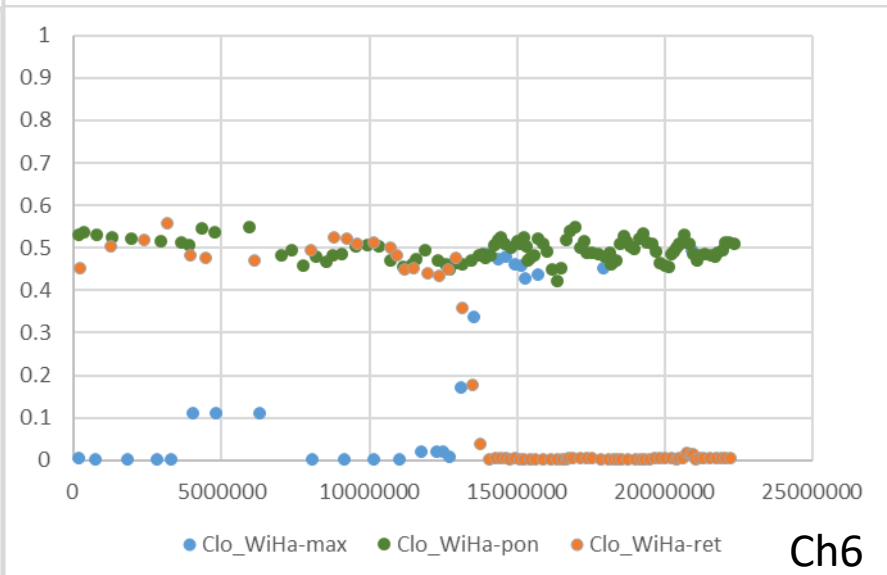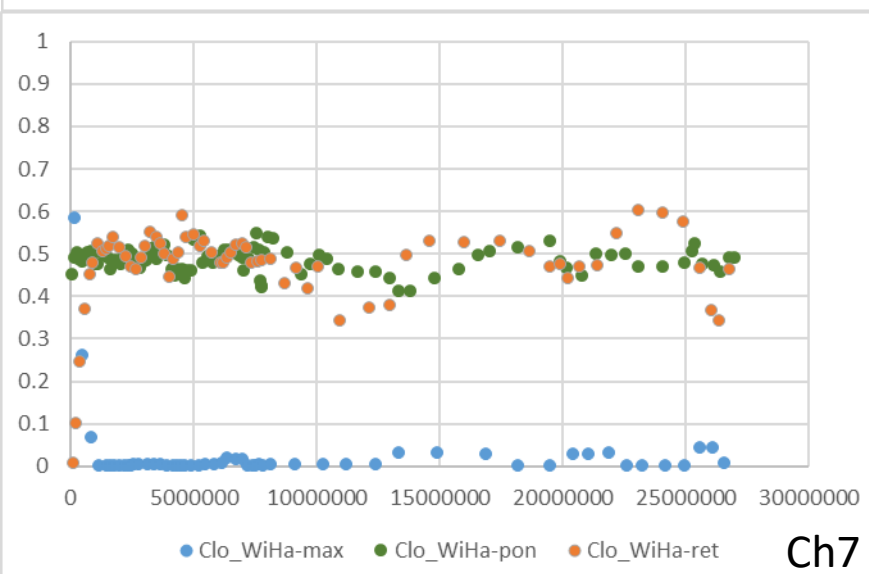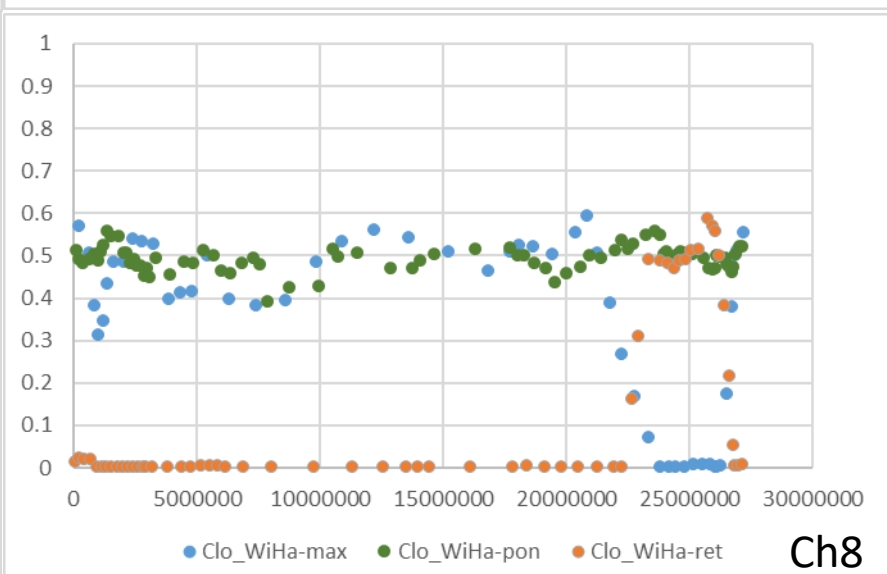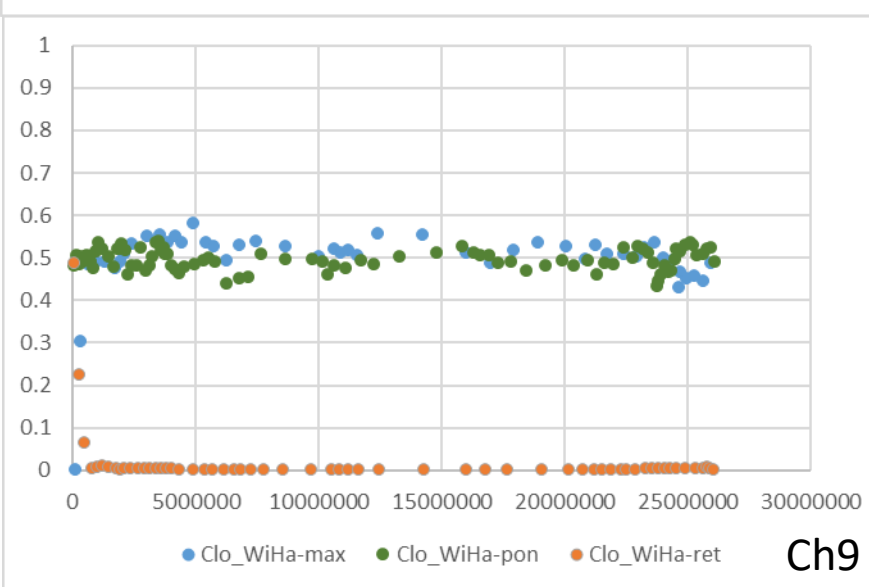

Clo\_WiHa

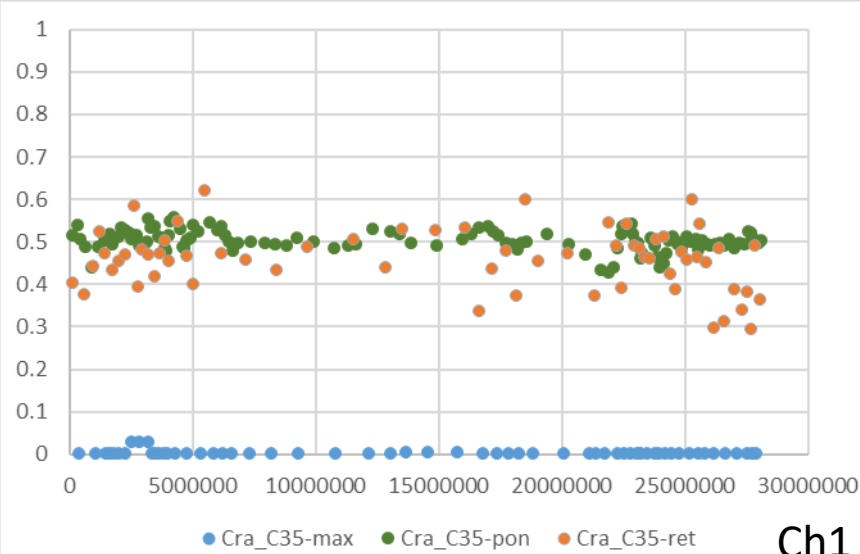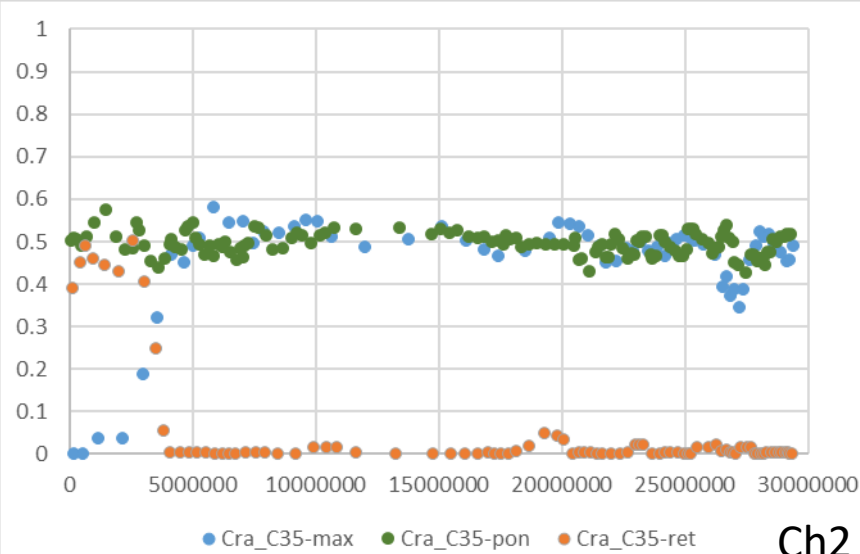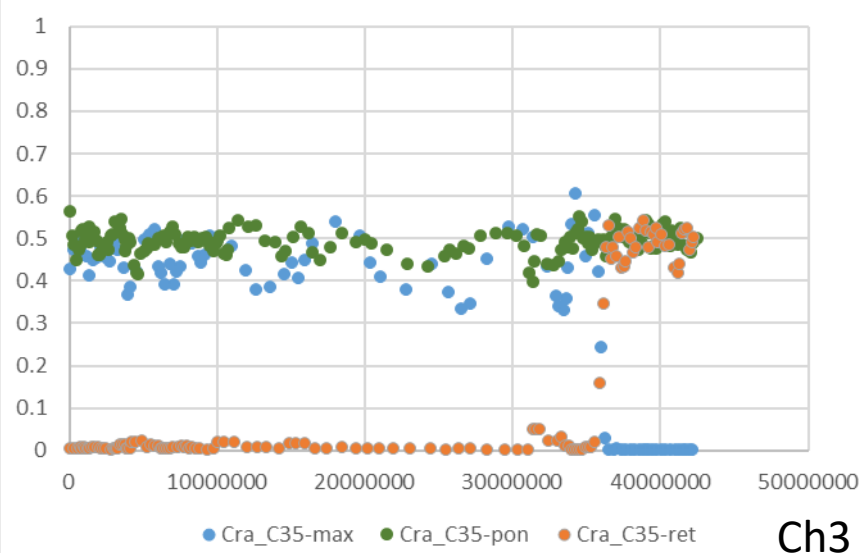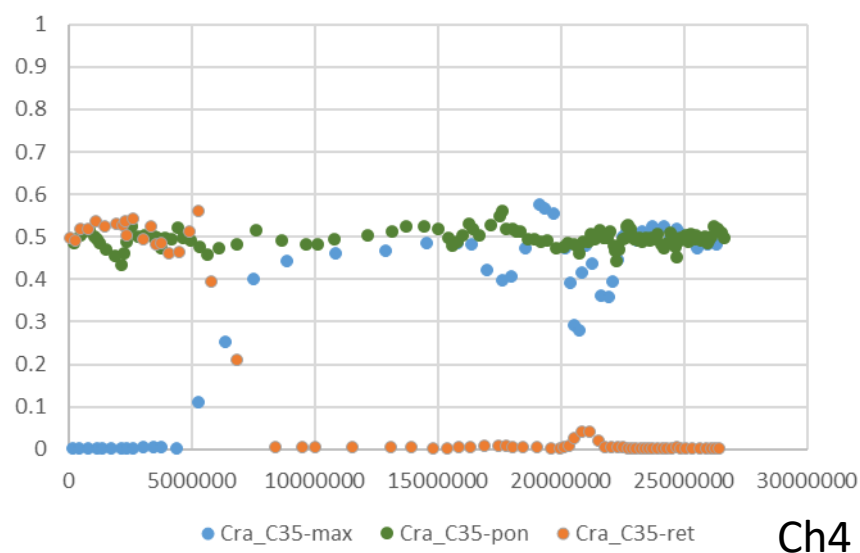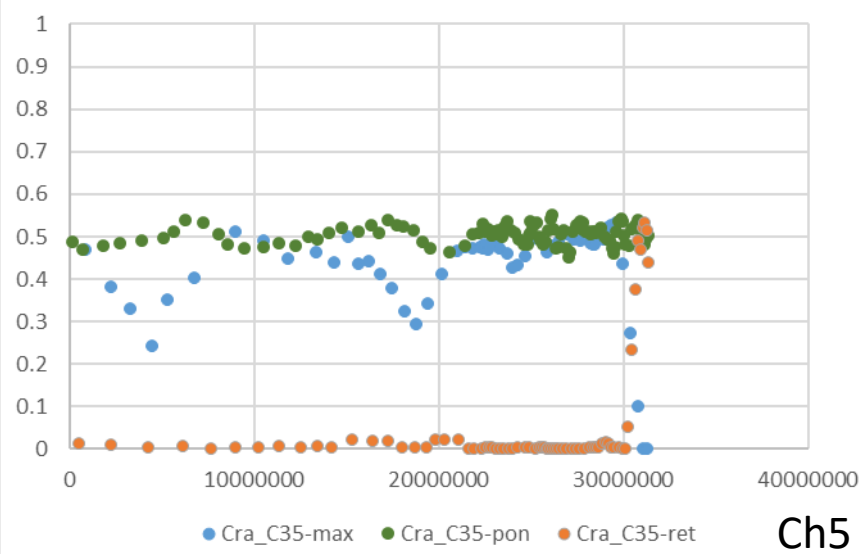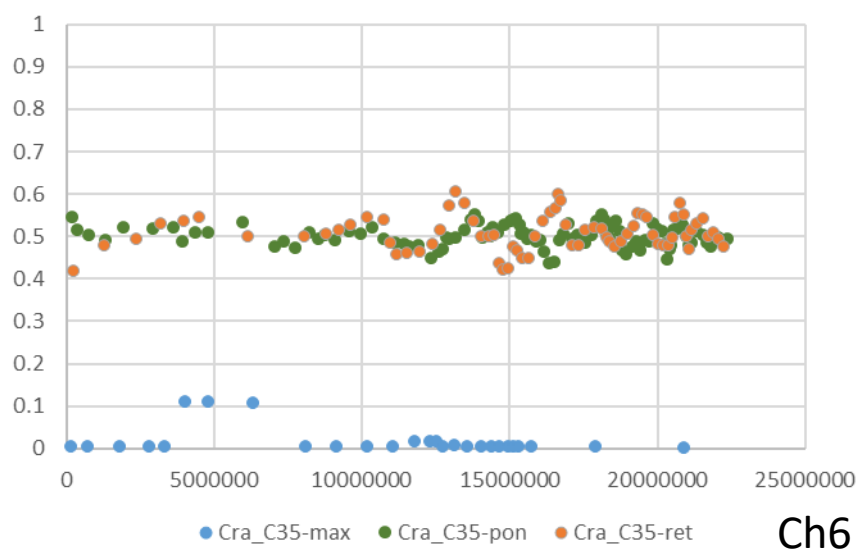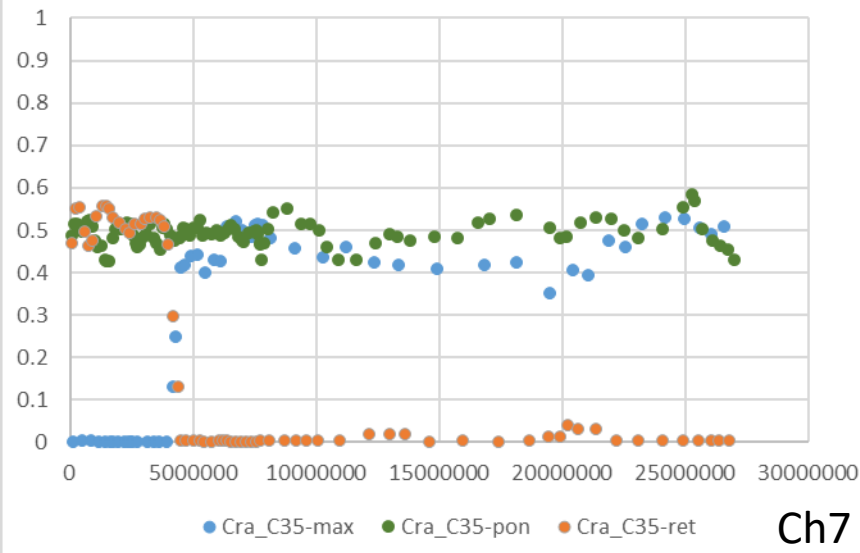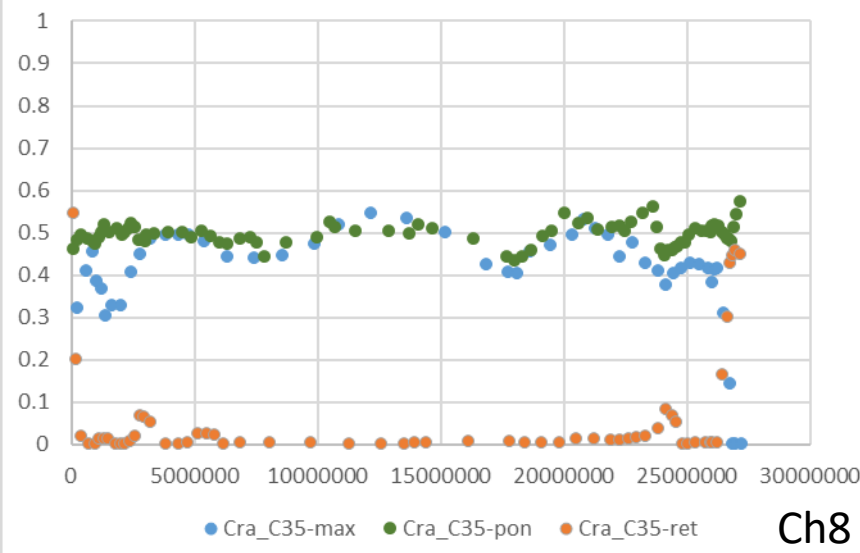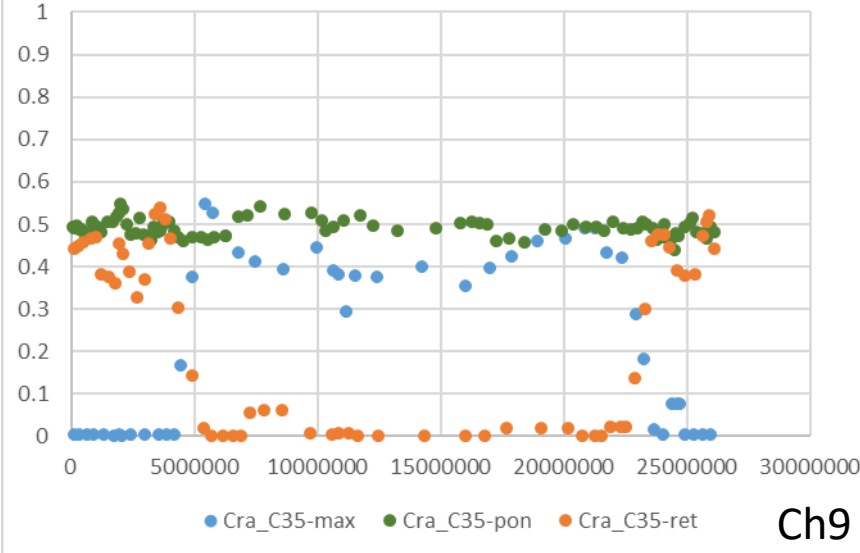

Cra\_C35

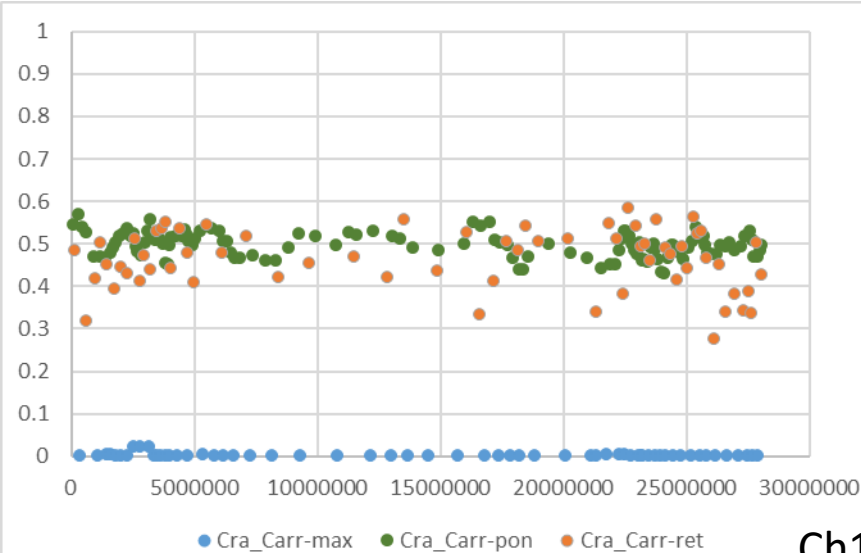

Ch1

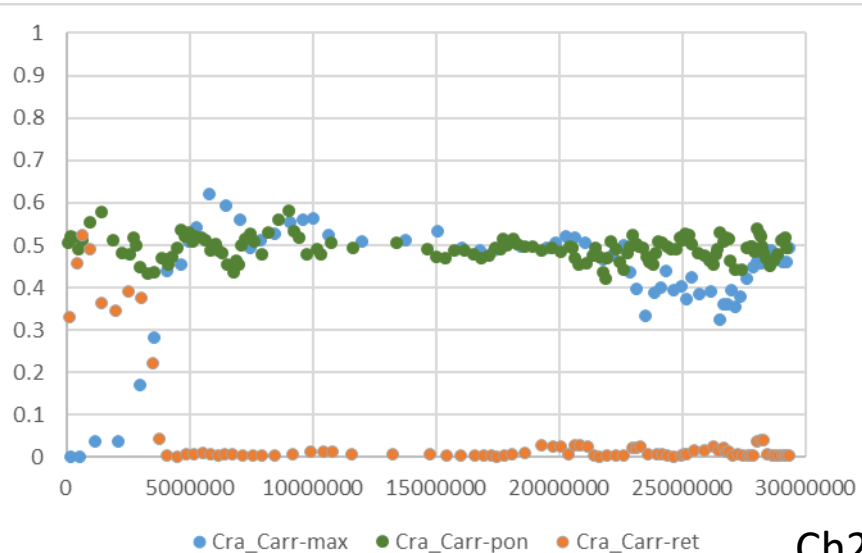

Ch2

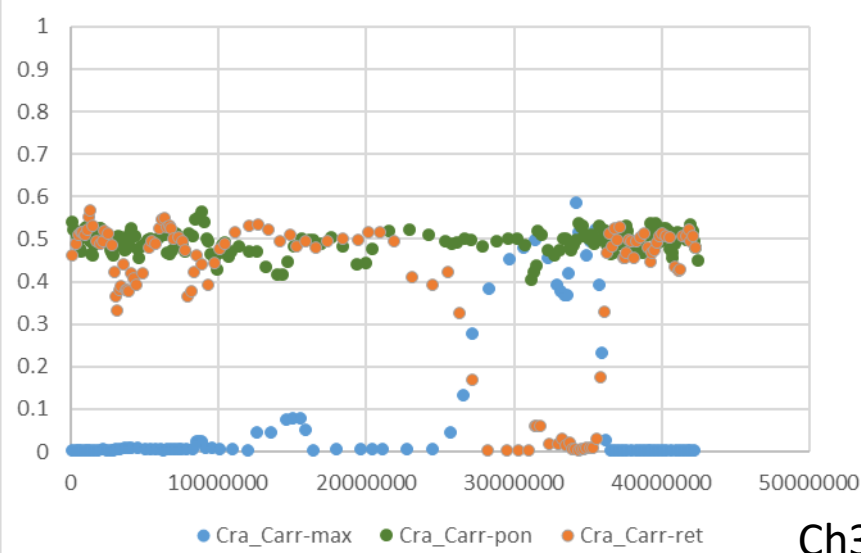

Ch3

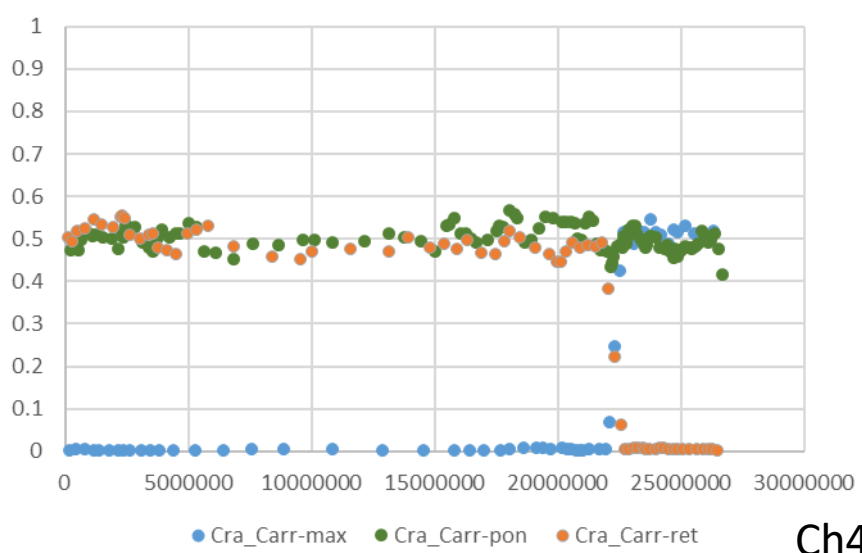

Ch4

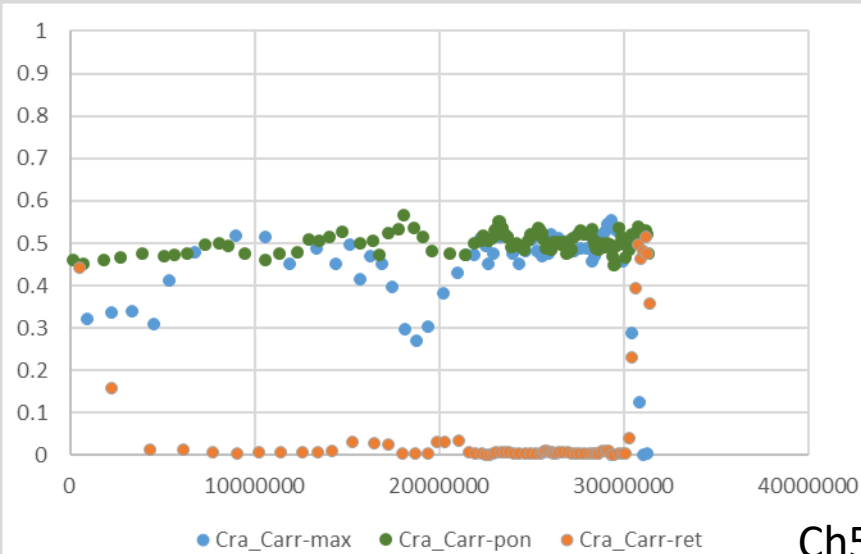

Ch5

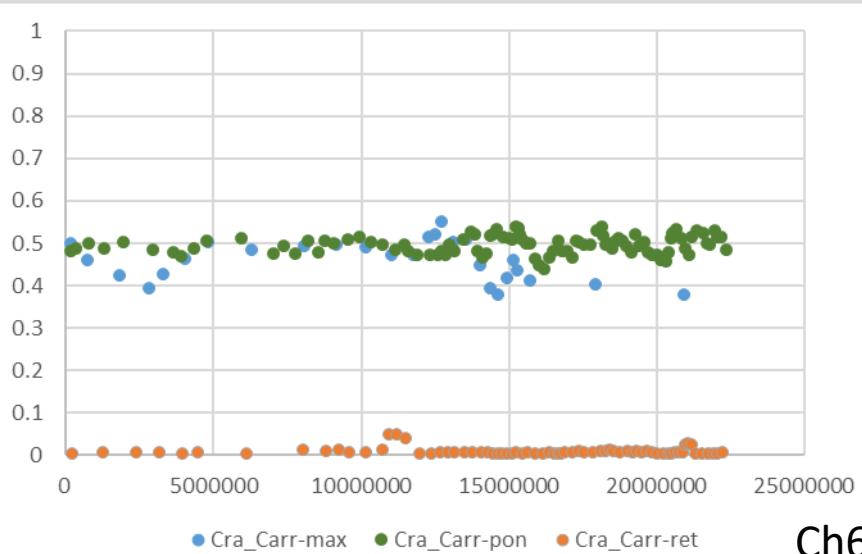

Ch6

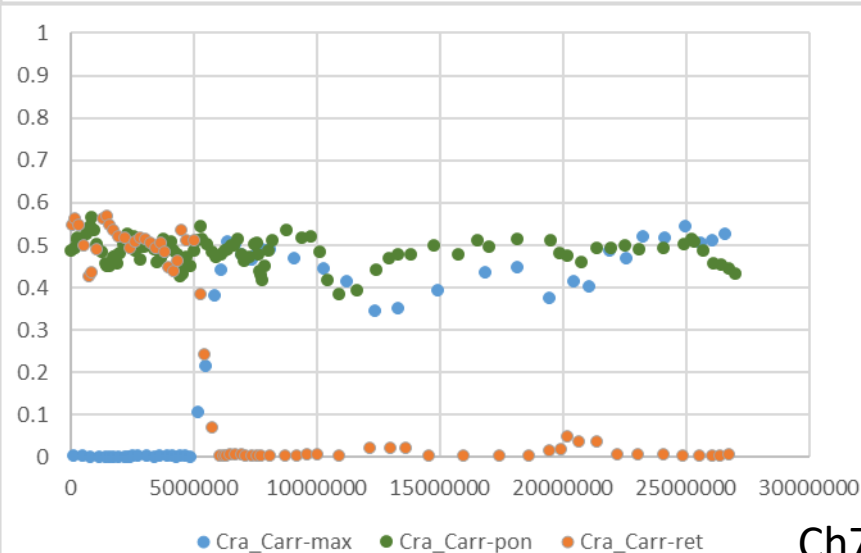

Ch7

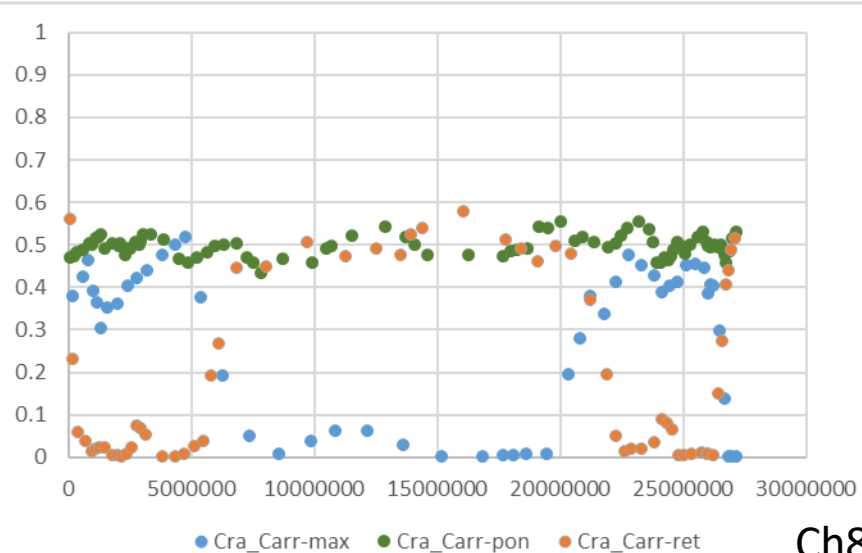

Ch8

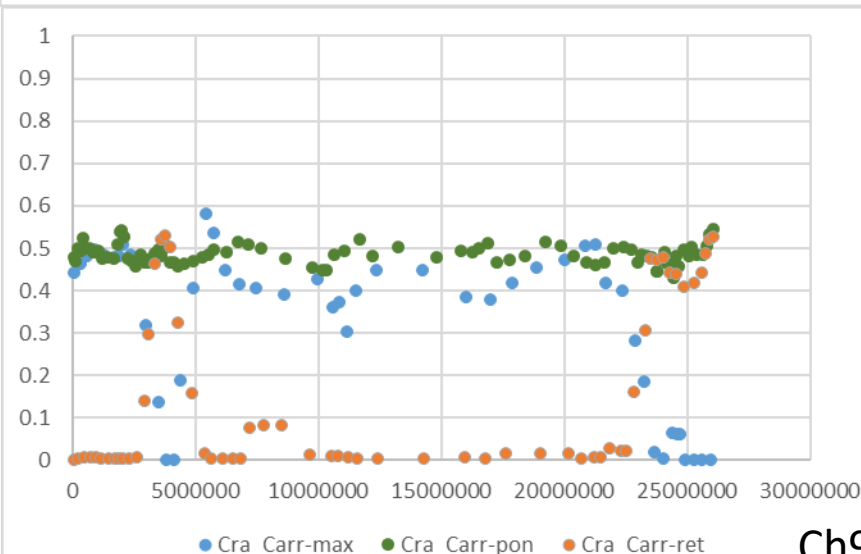

Ch9

Cra\_Carr

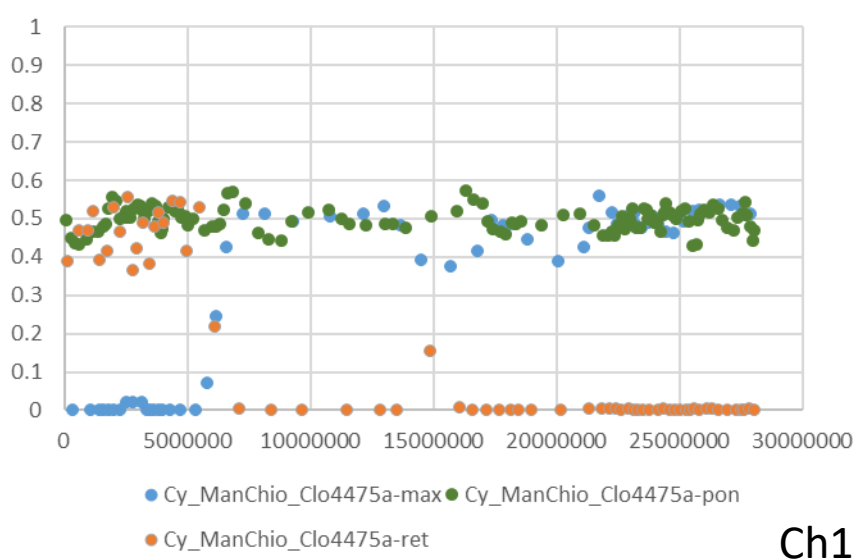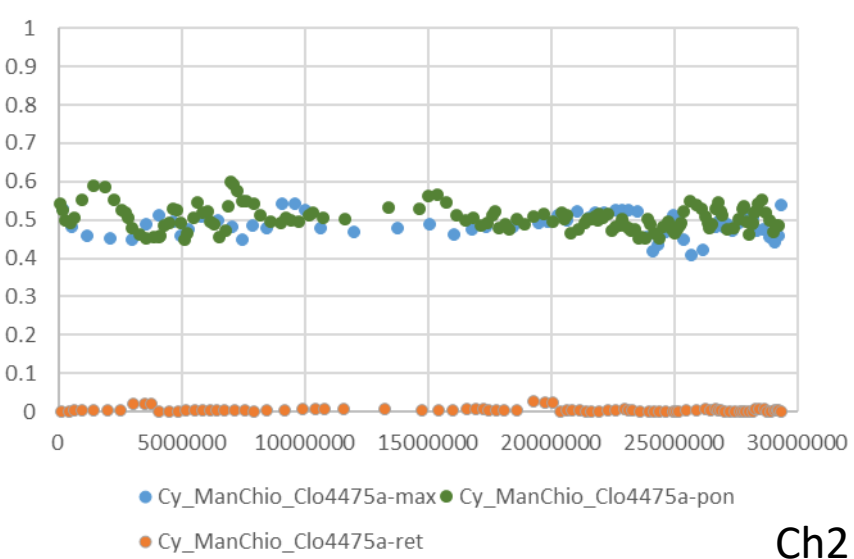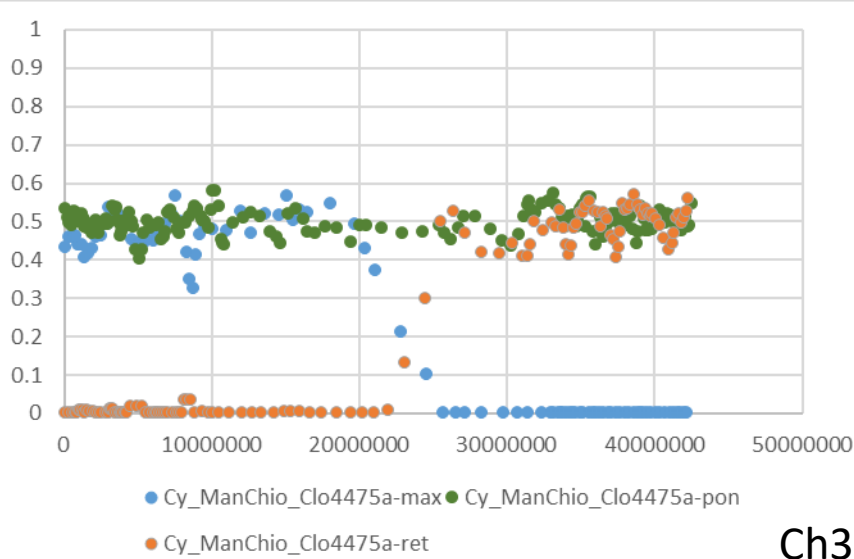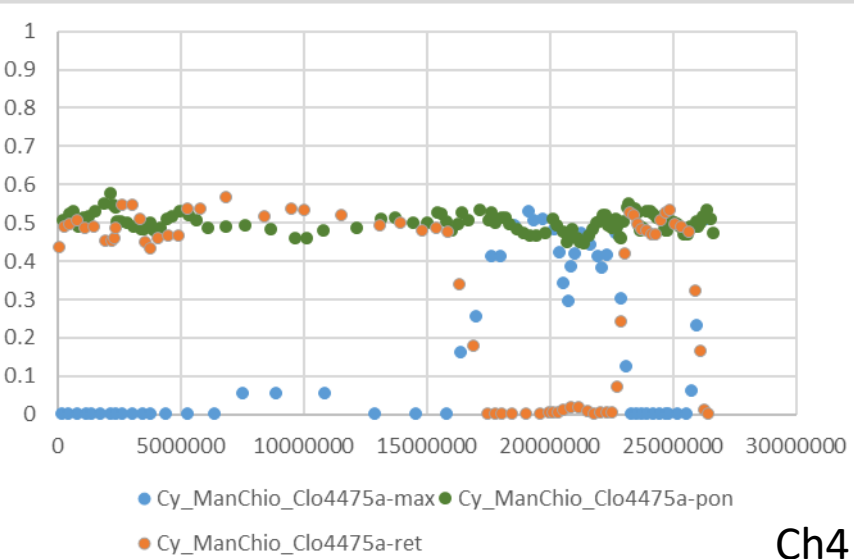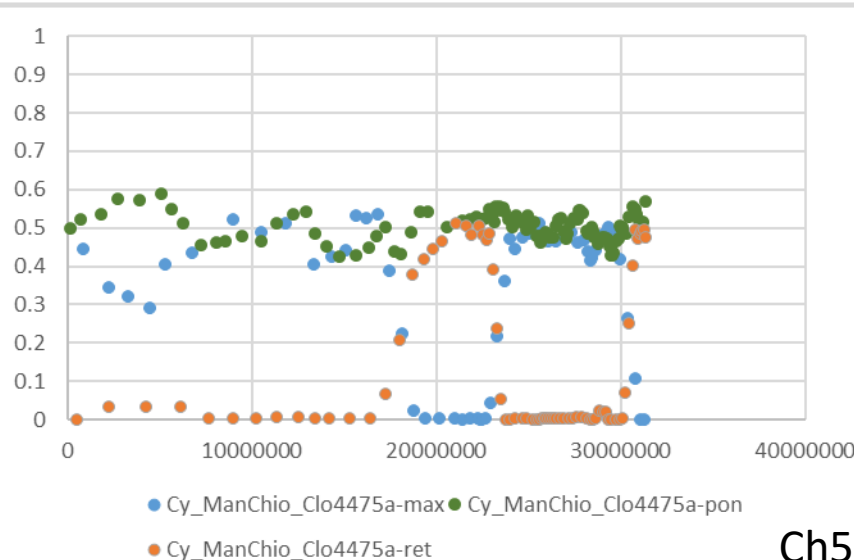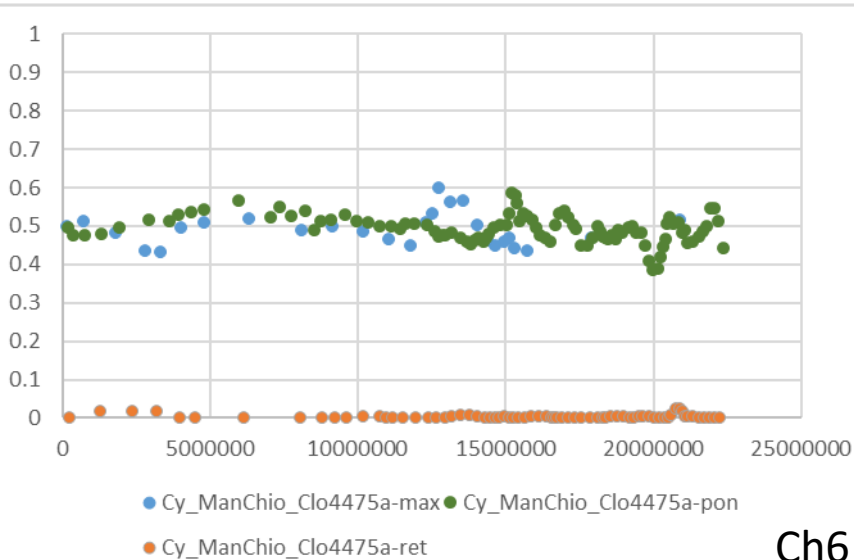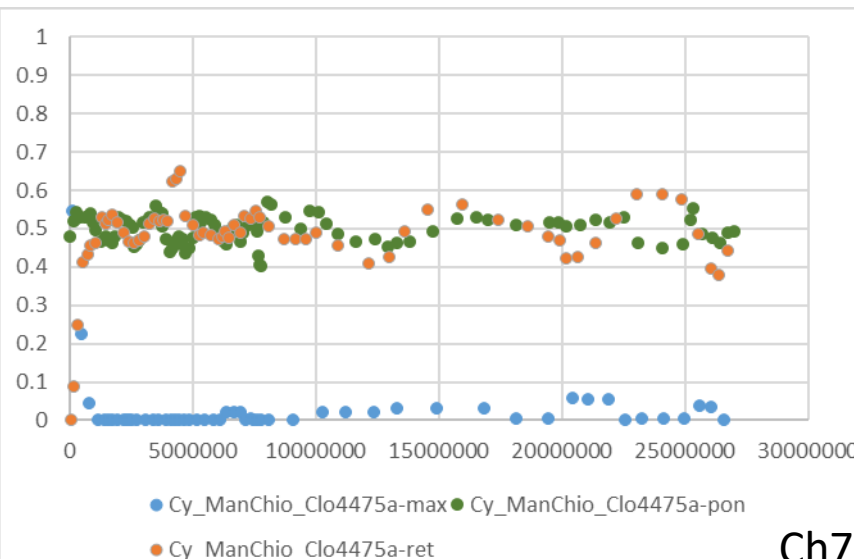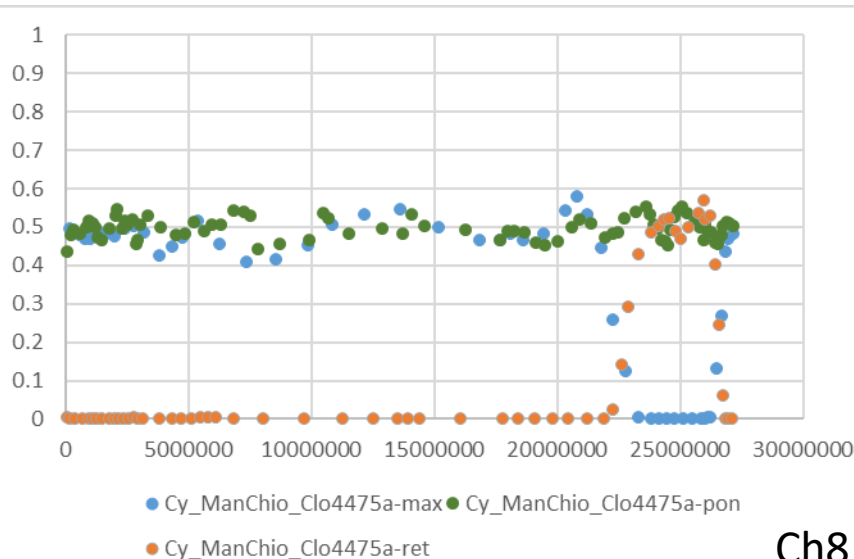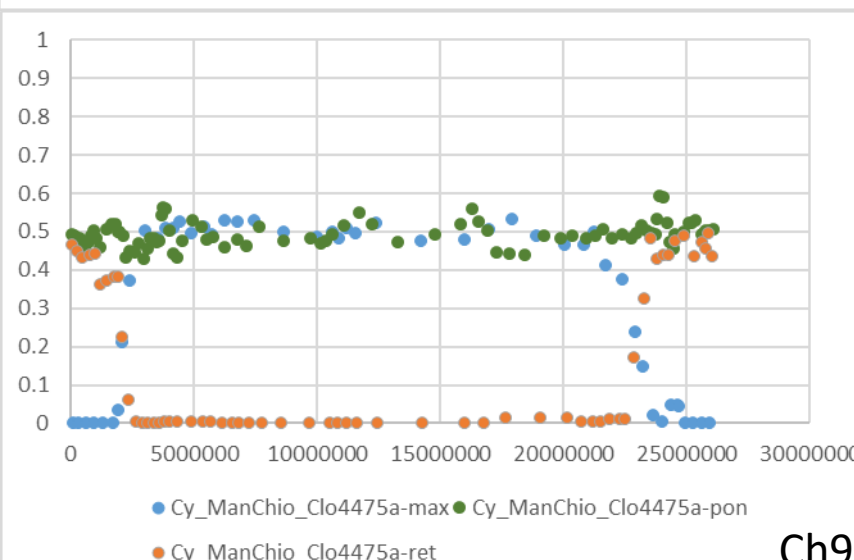

Cy\_ManChios\_Clo4475a



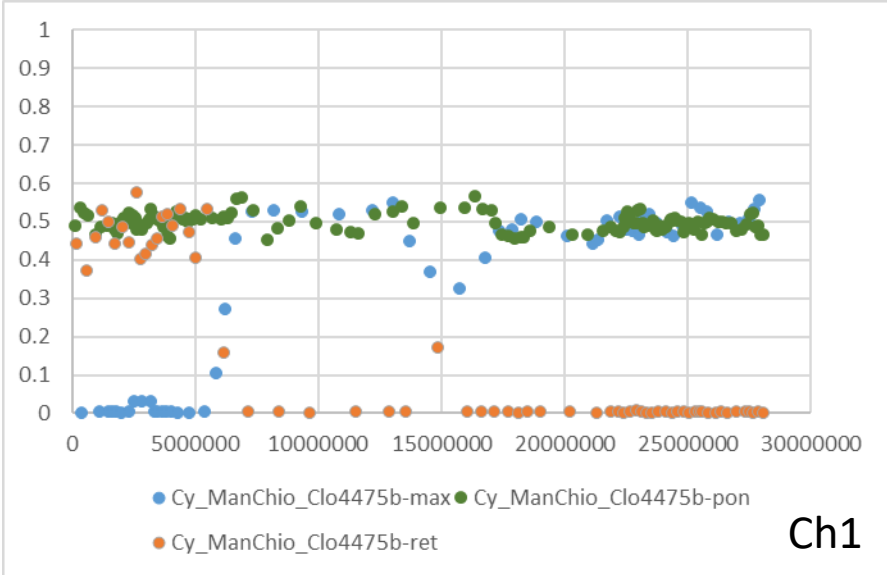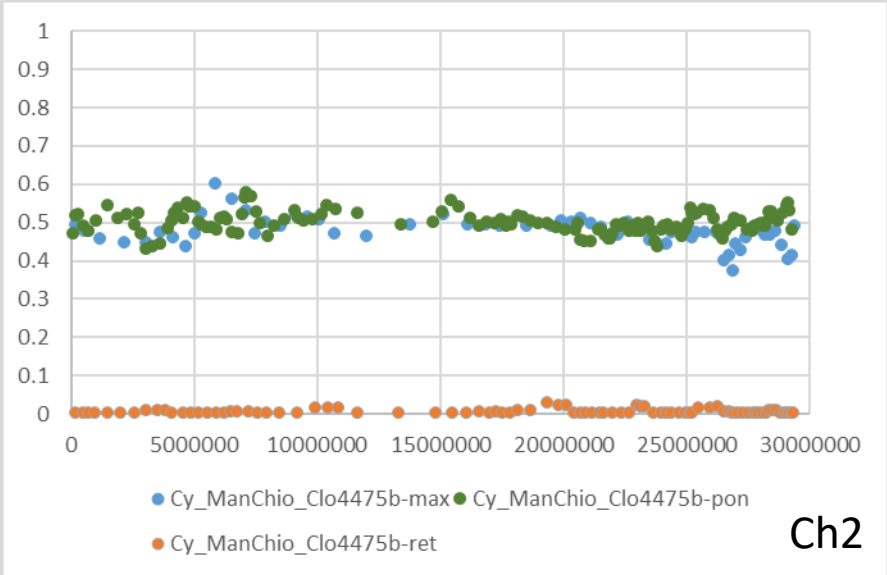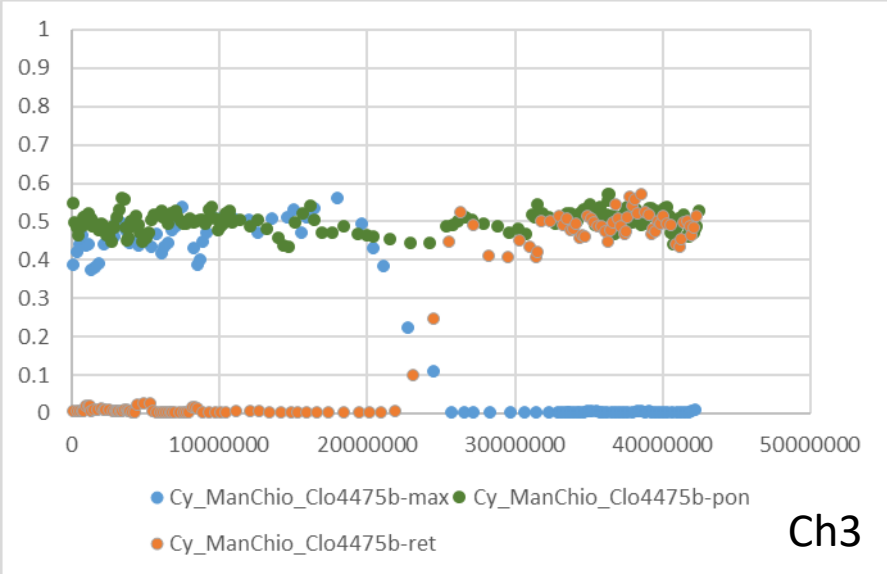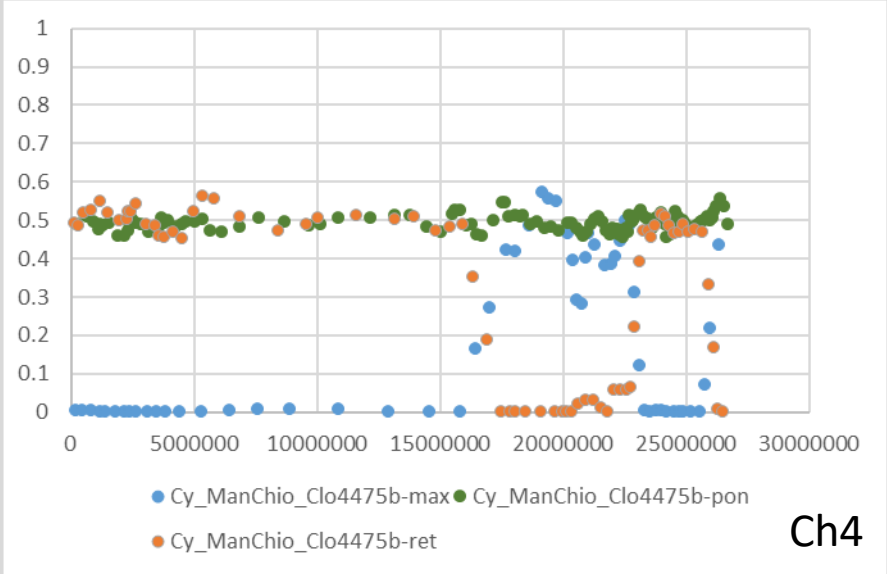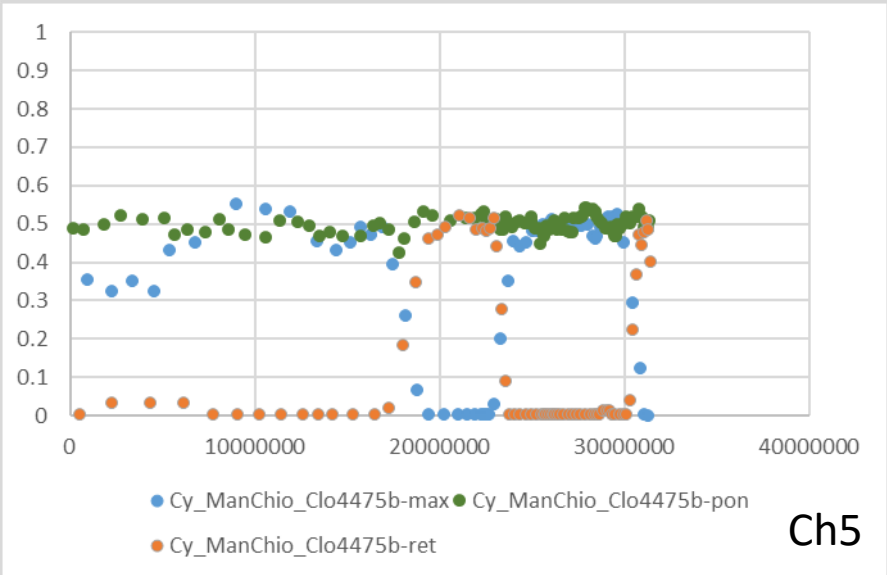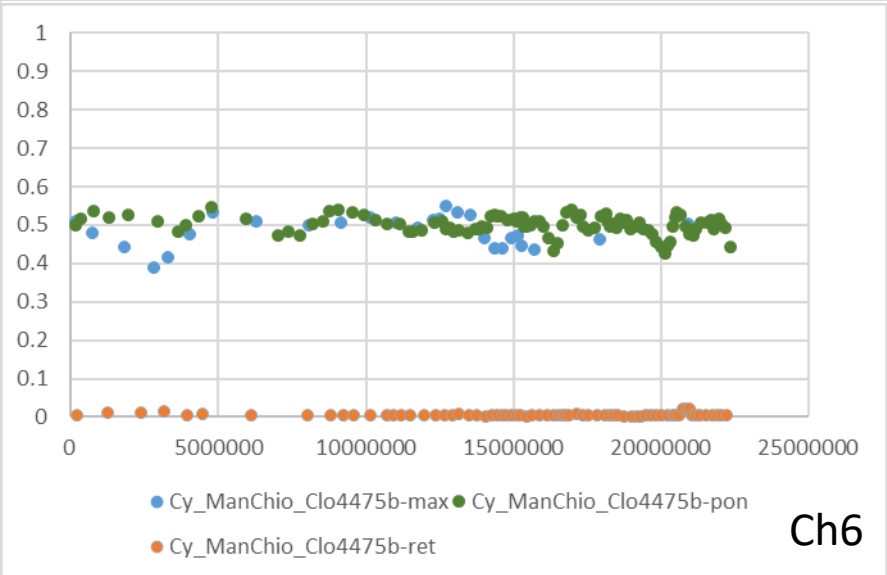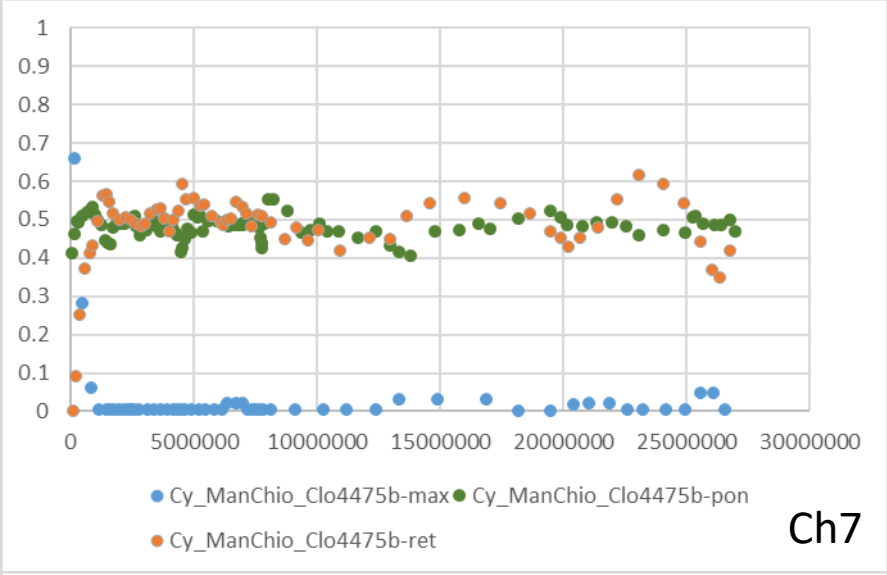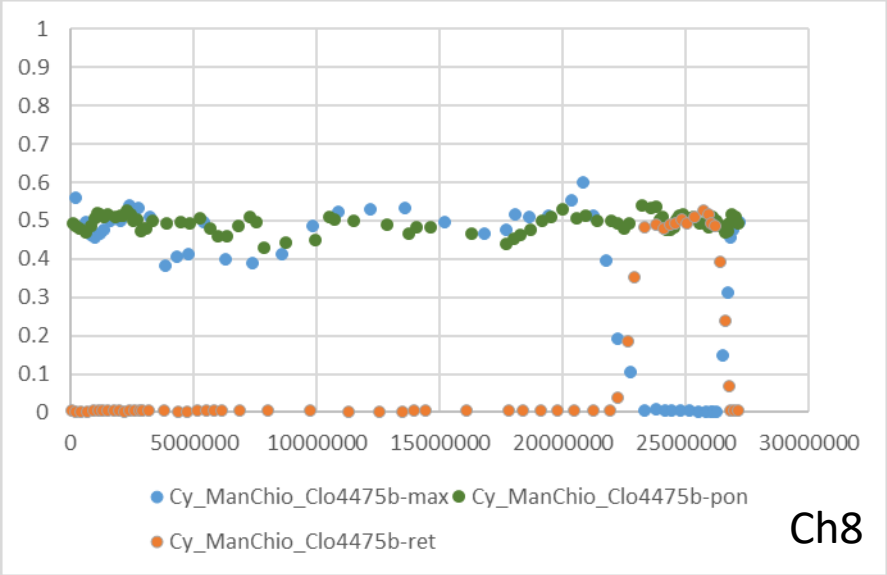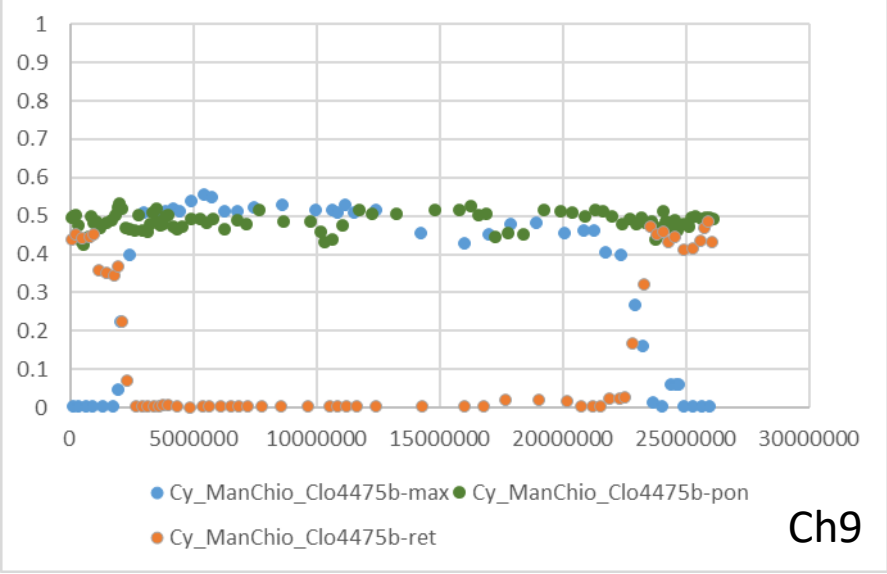

Cy\_ManChios\_Clo4475b

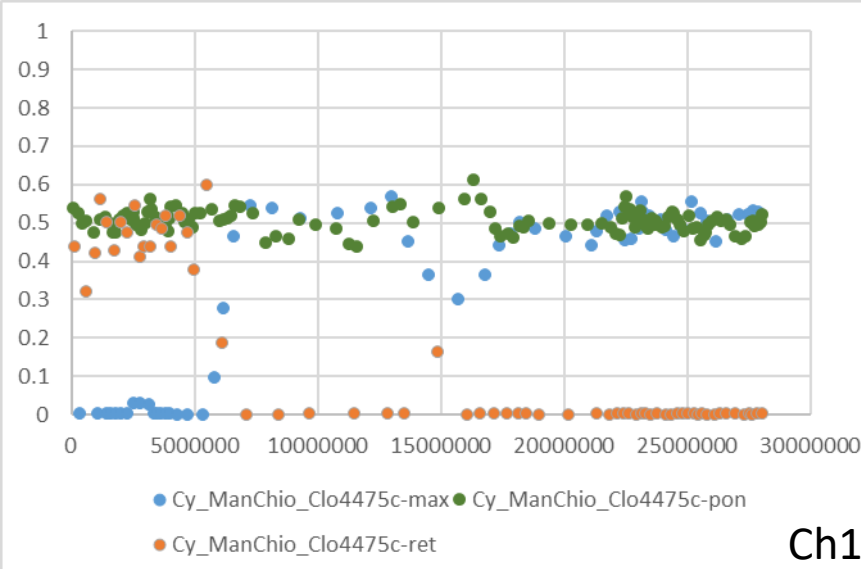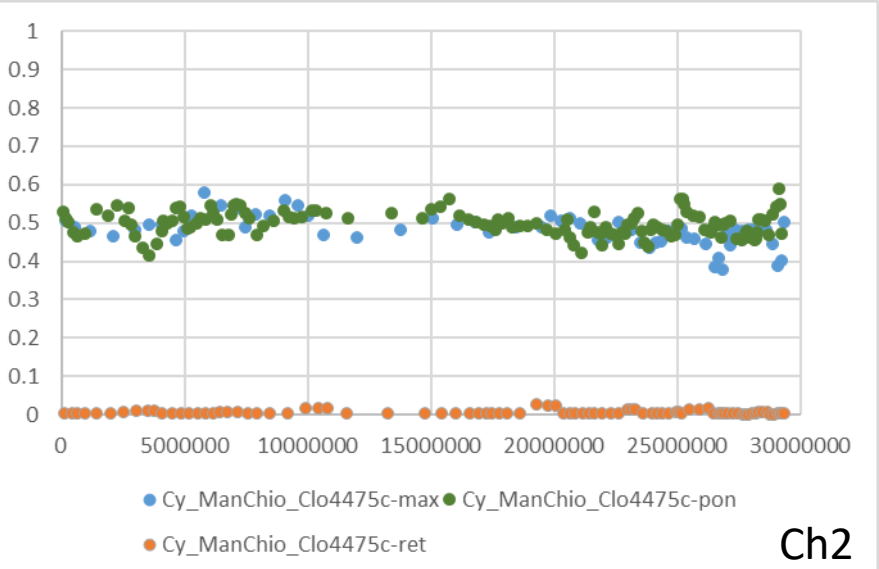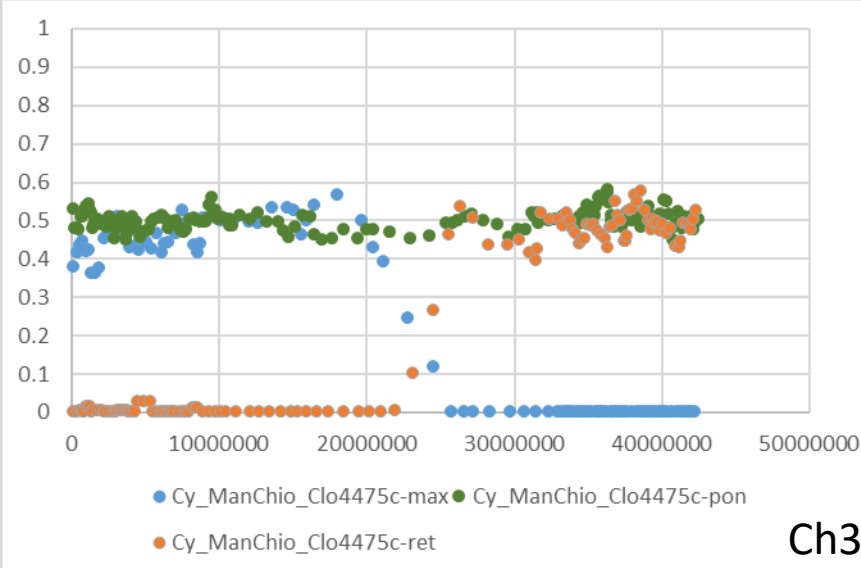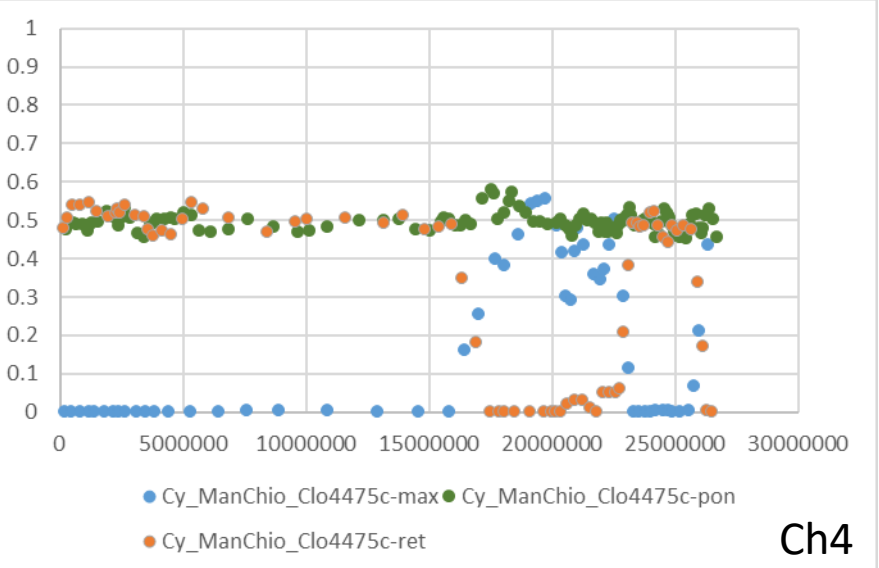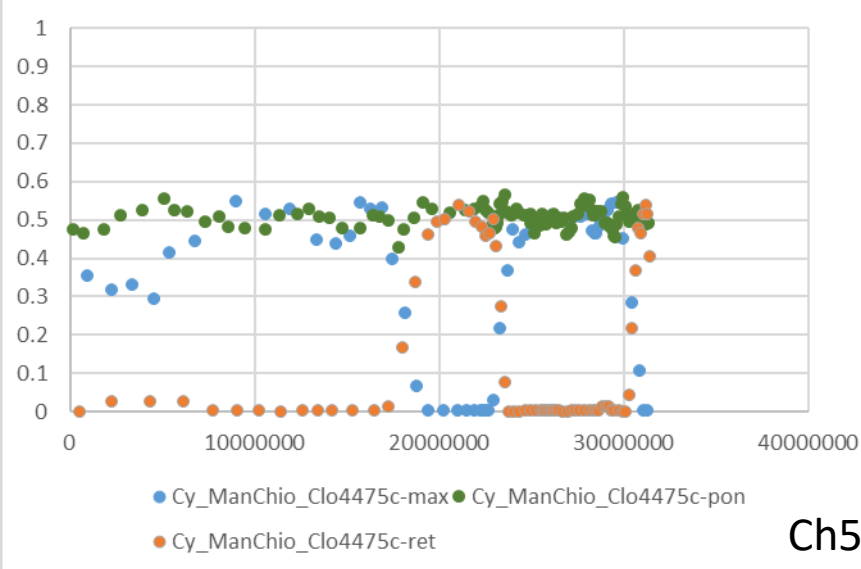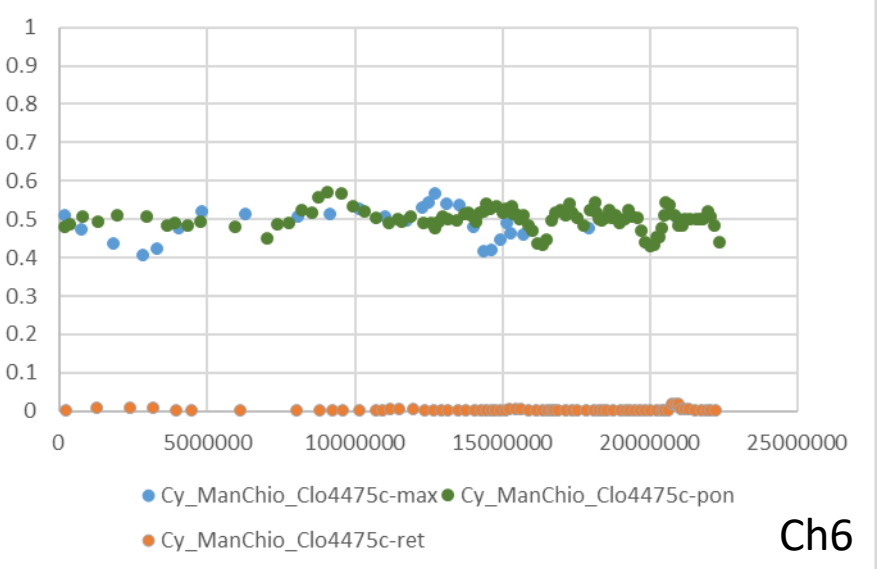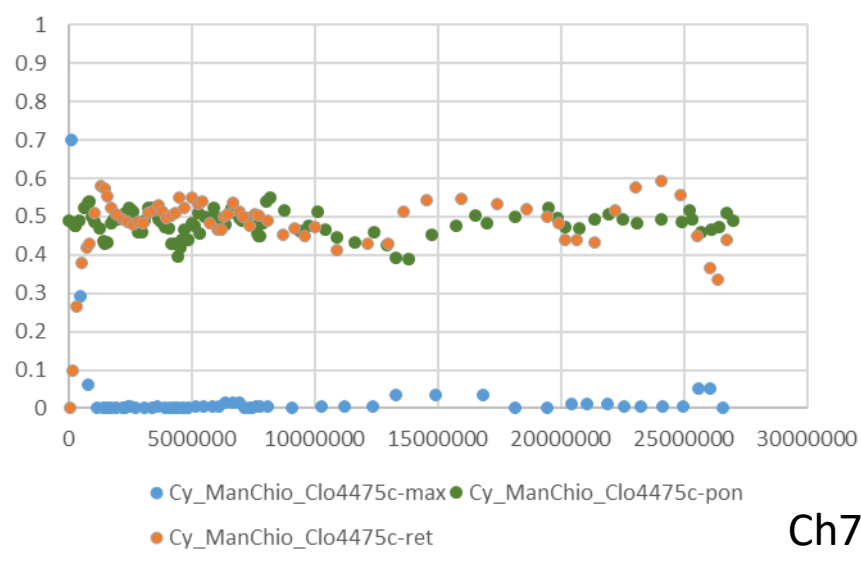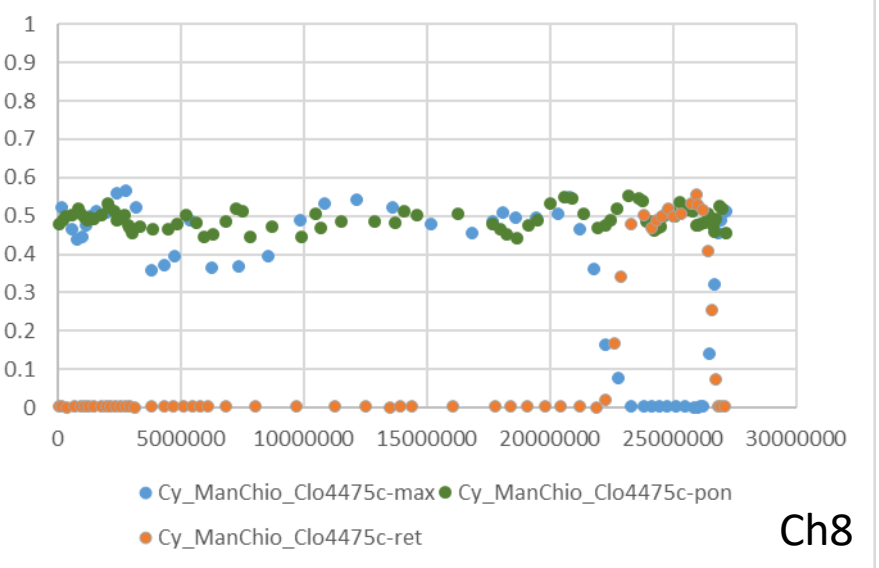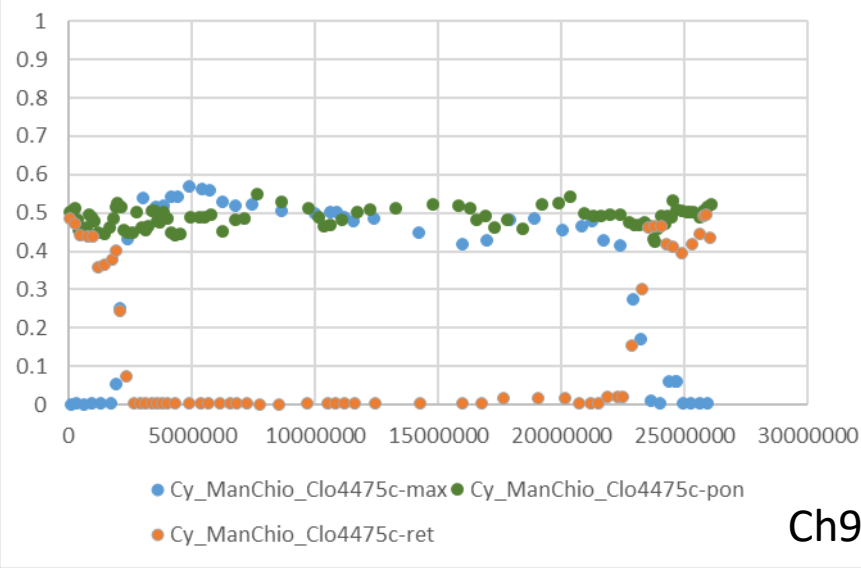

Cy\_ManChios\_Clo4475c



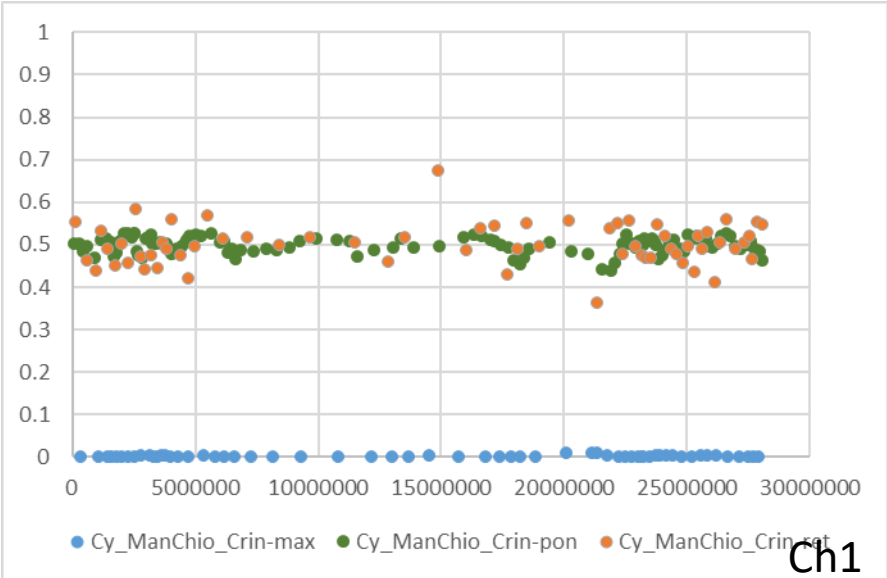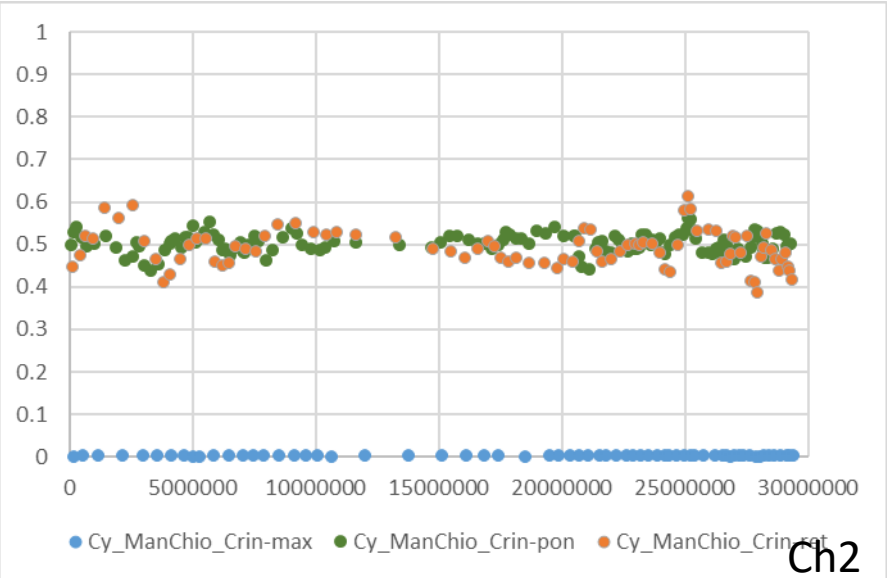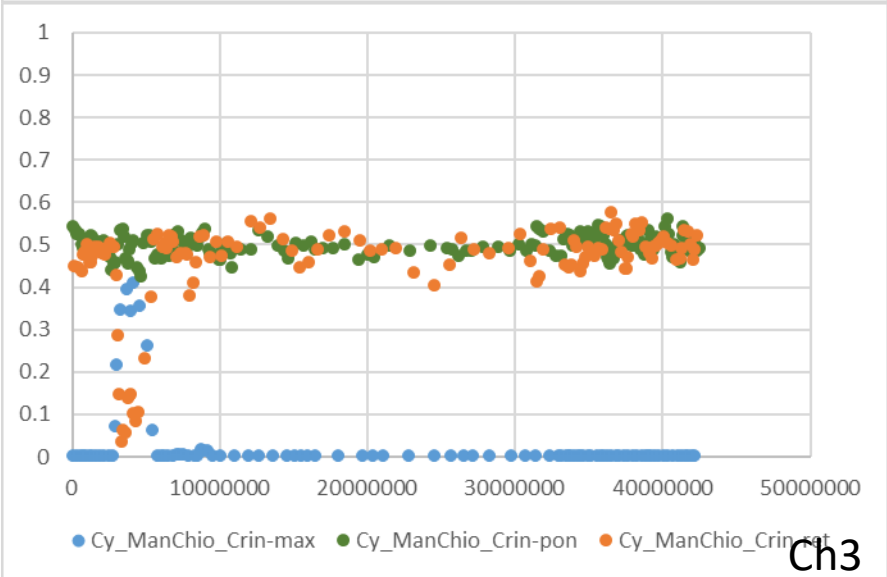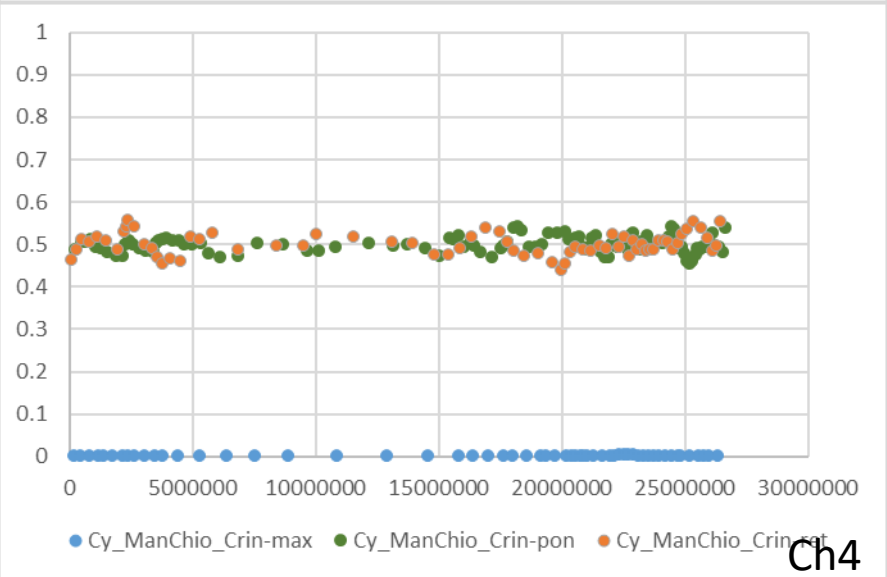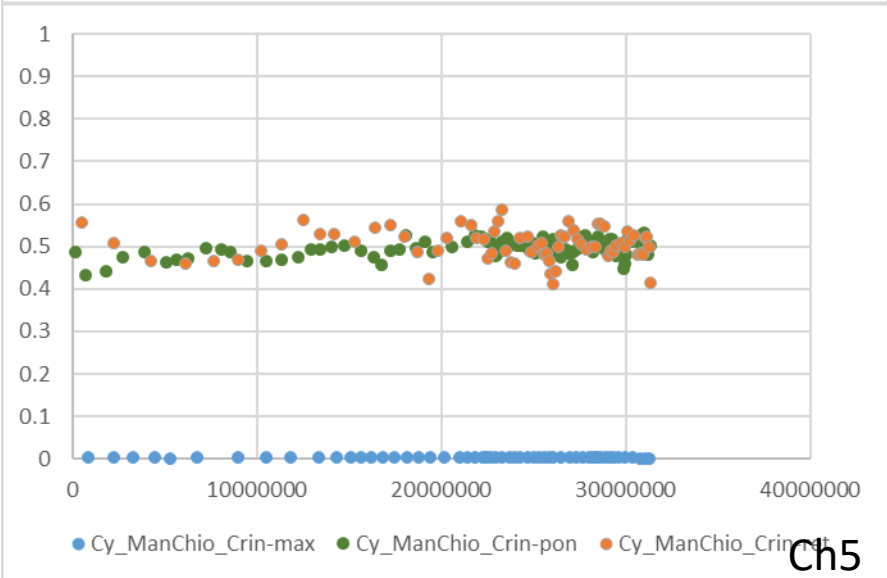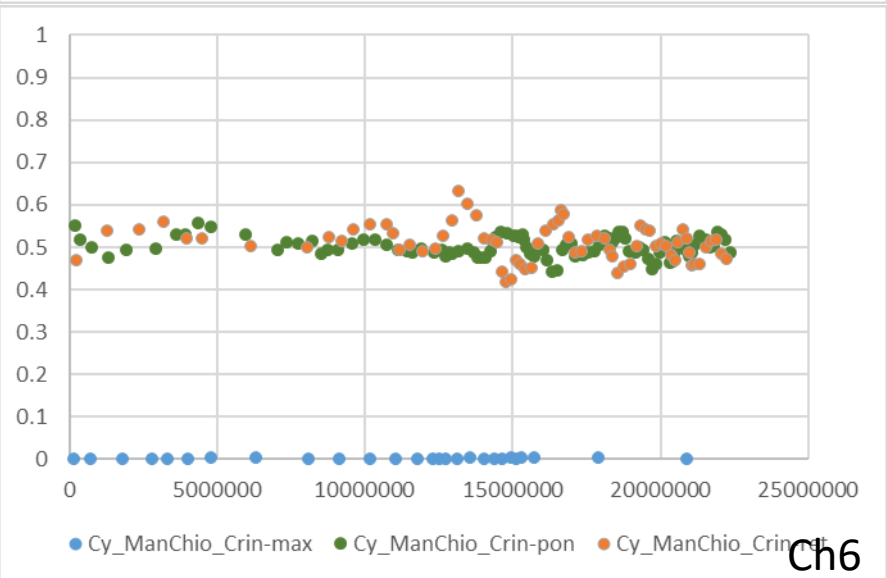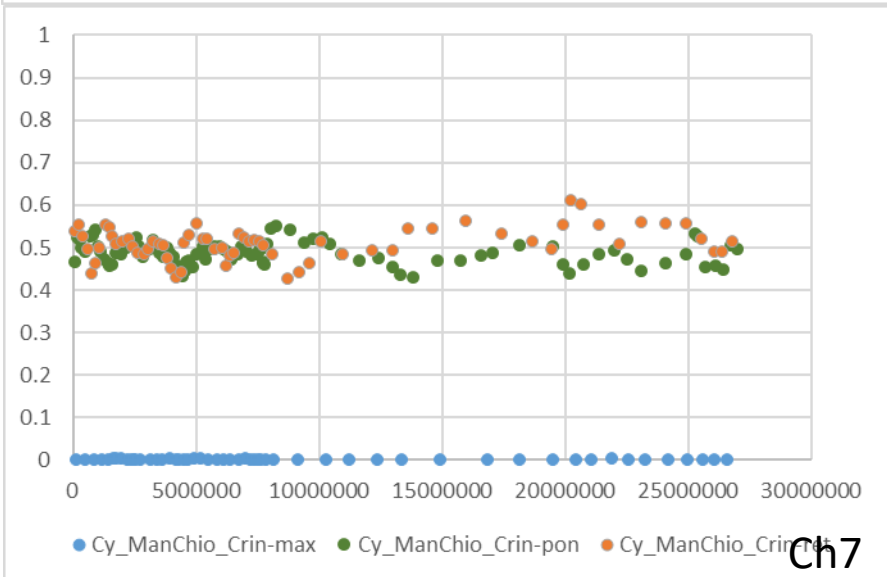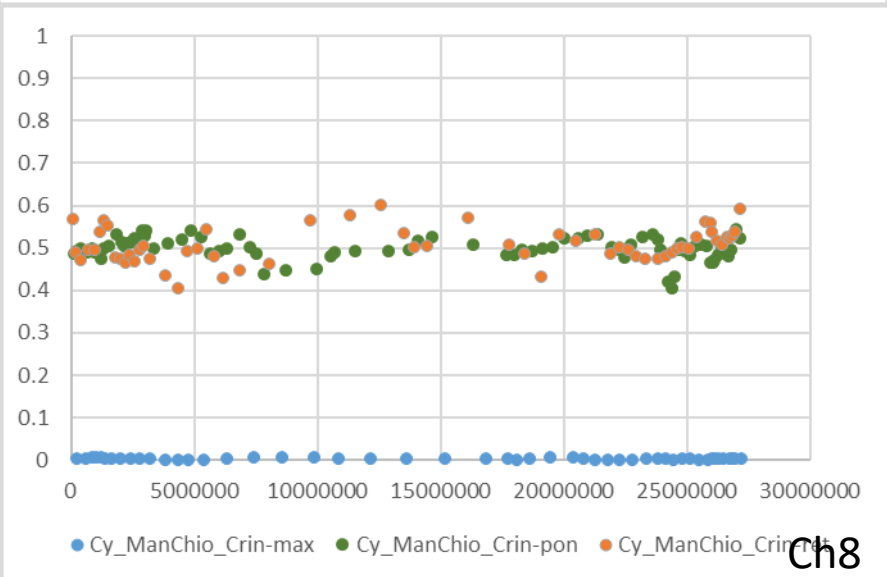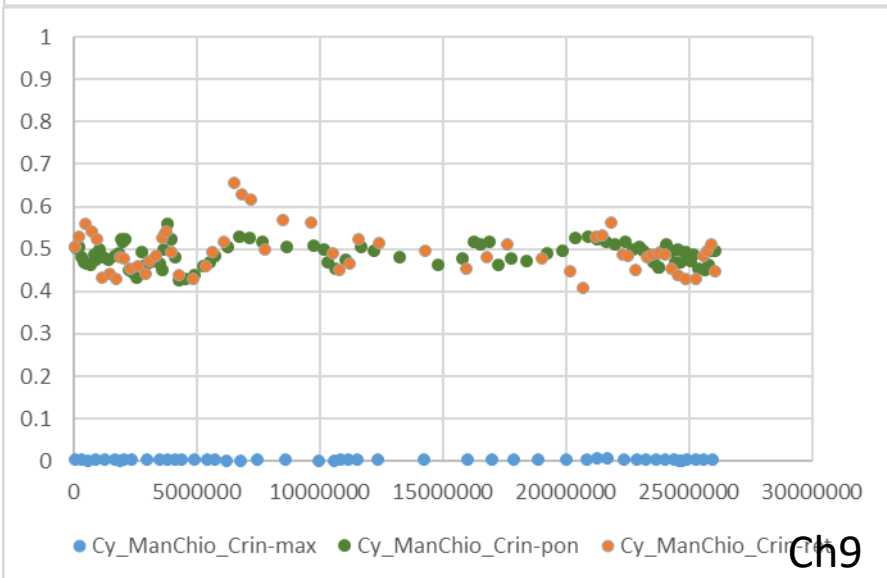

Cy\_ManChio\_Crin

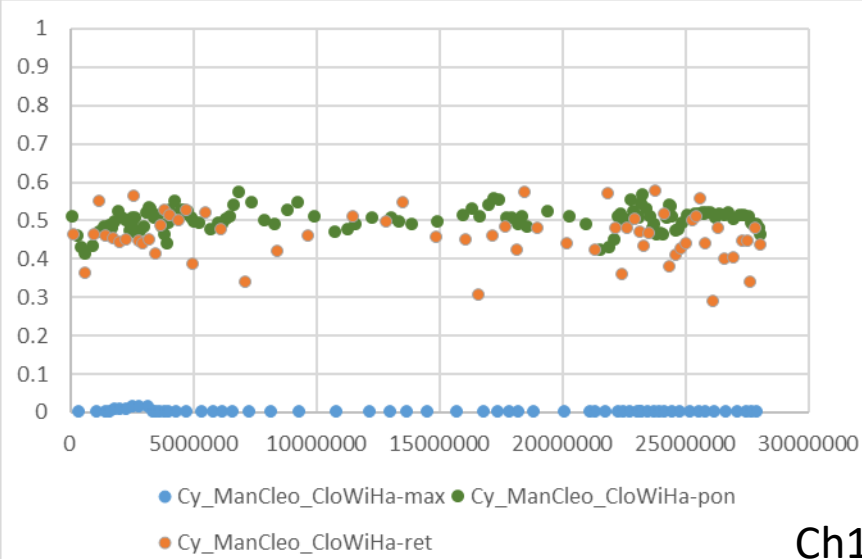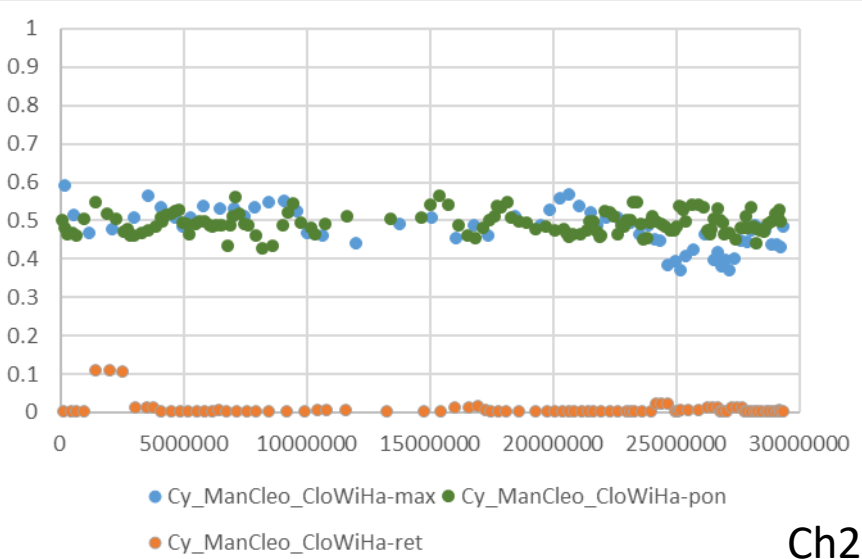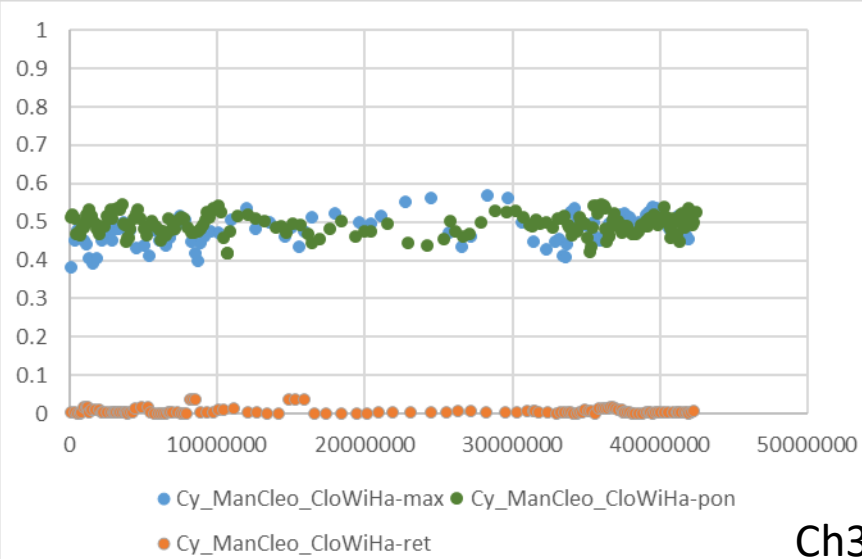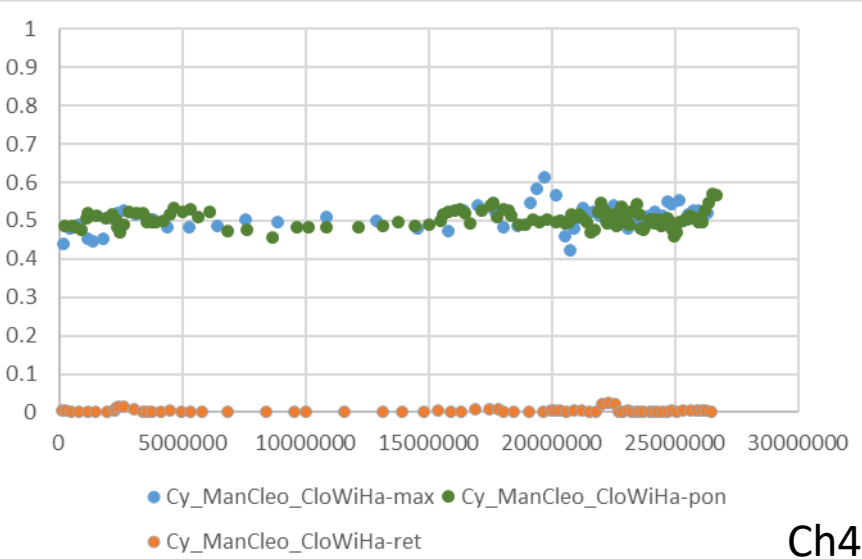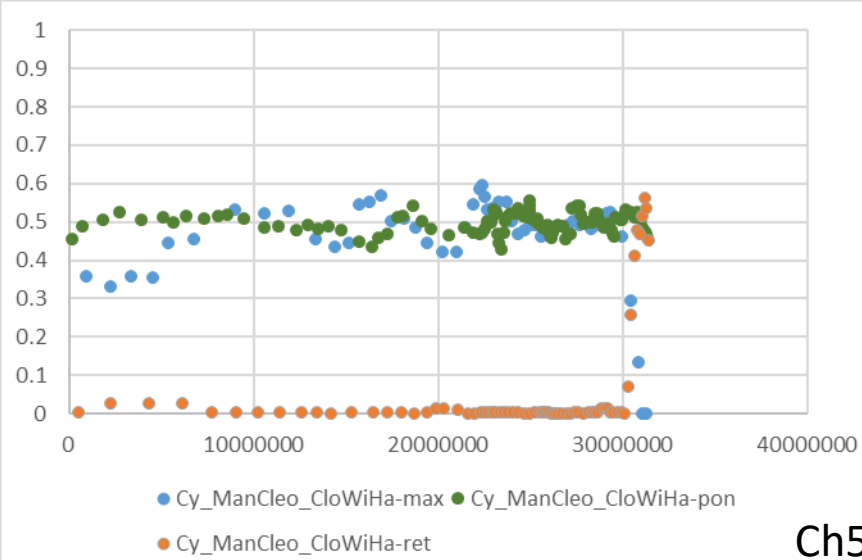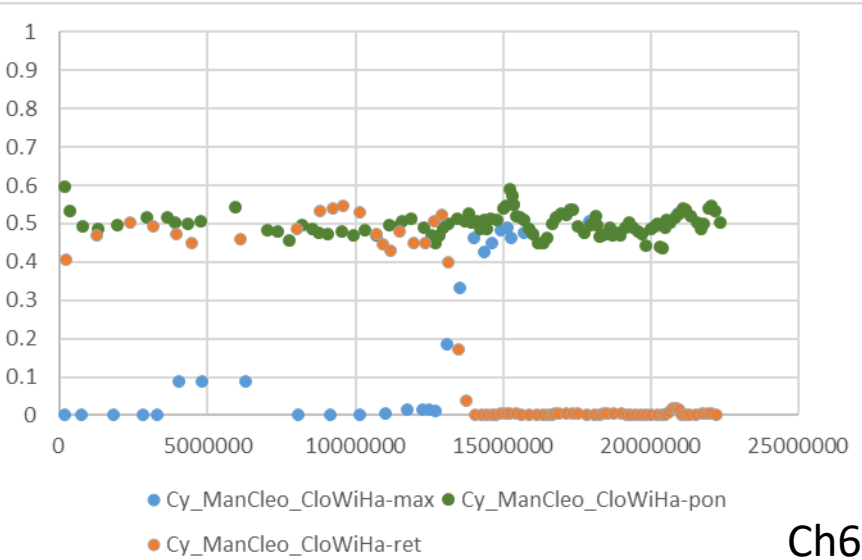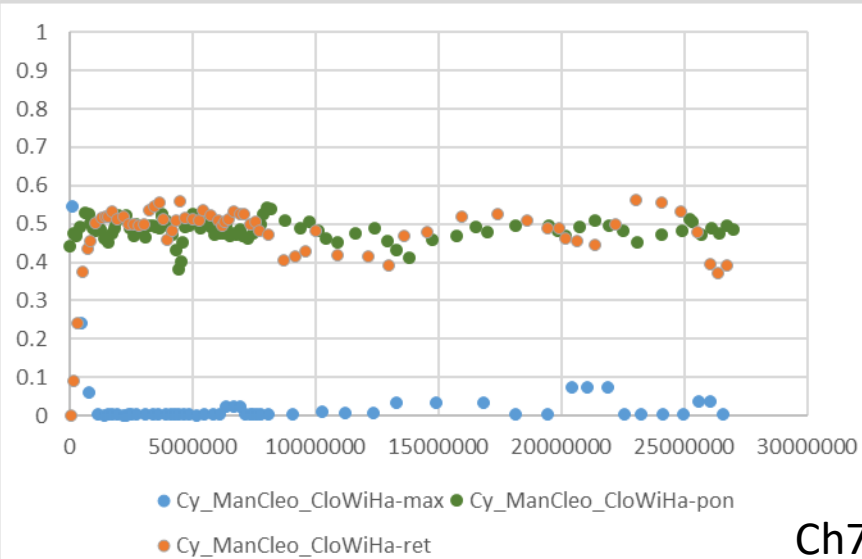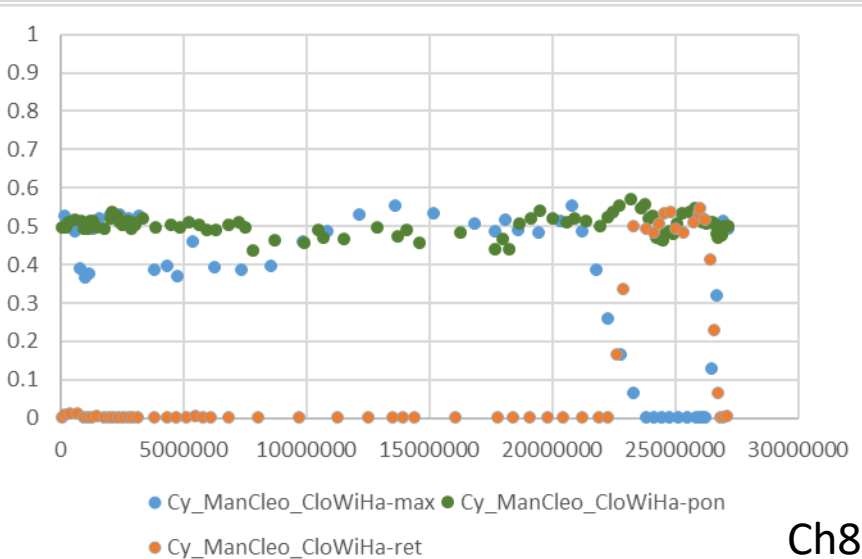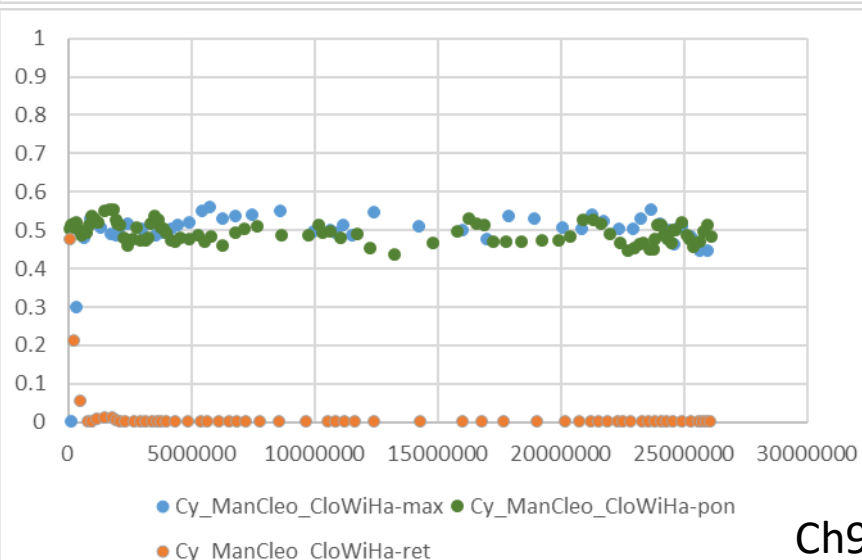

Cy\_MandCleo\_CloWiHa

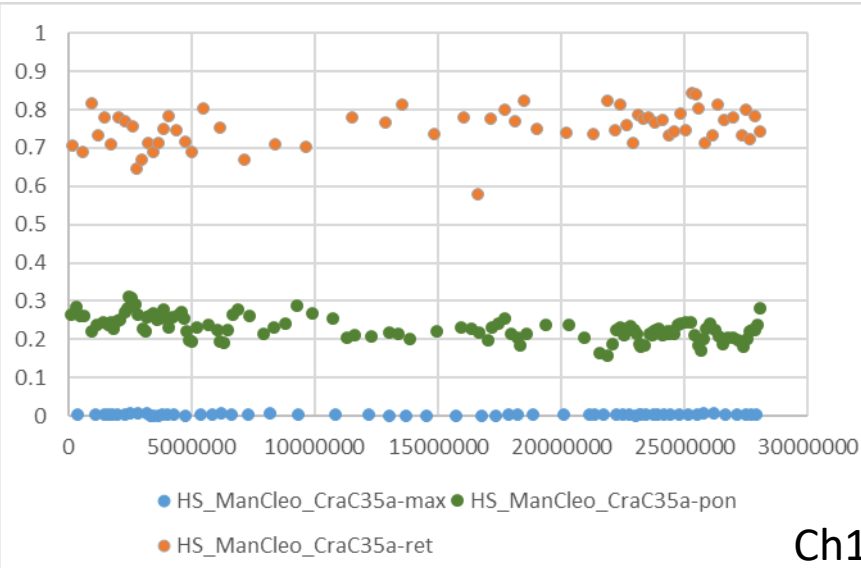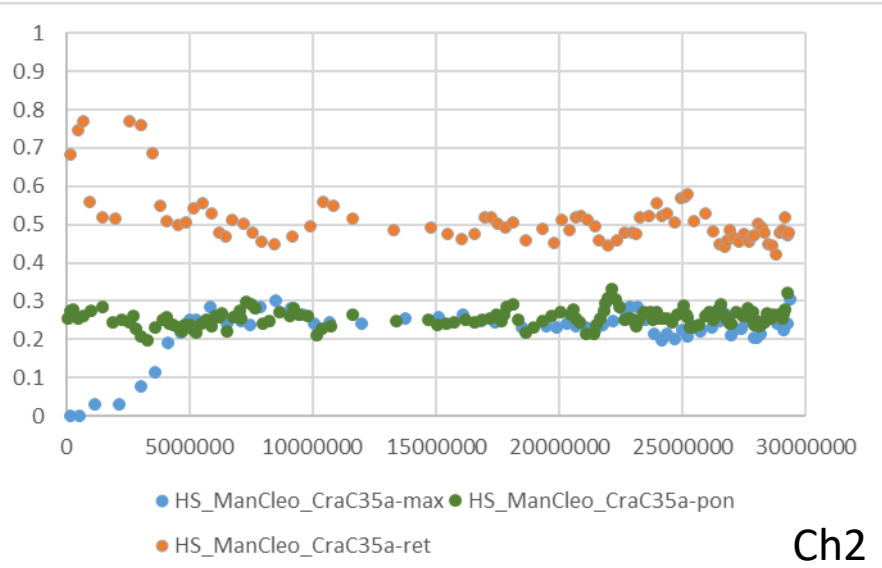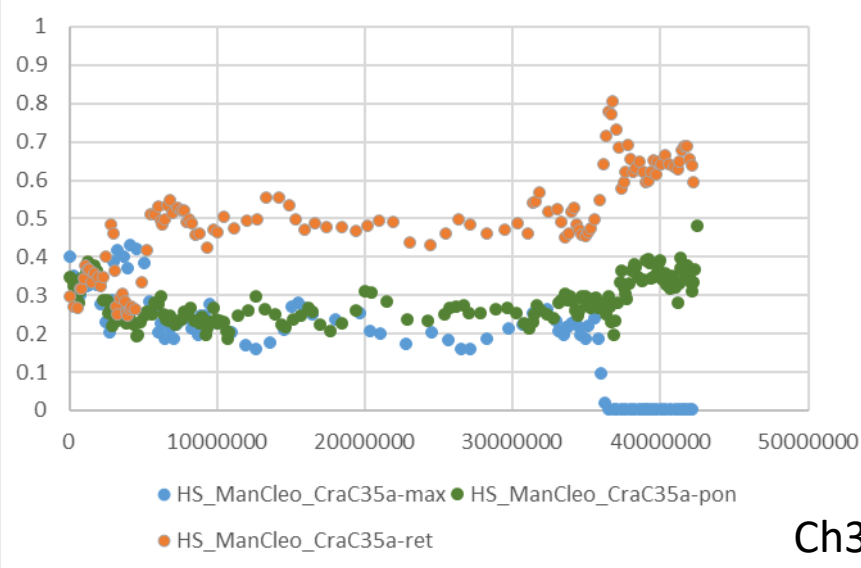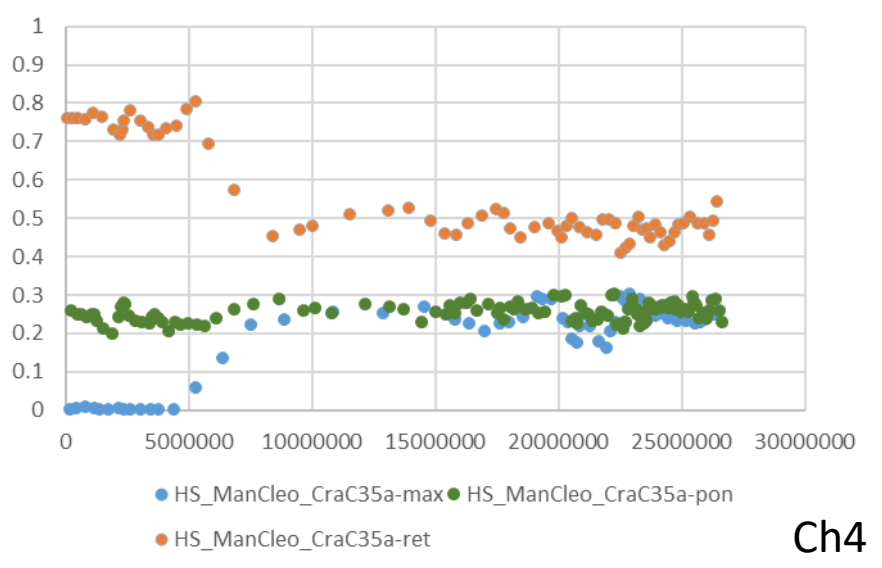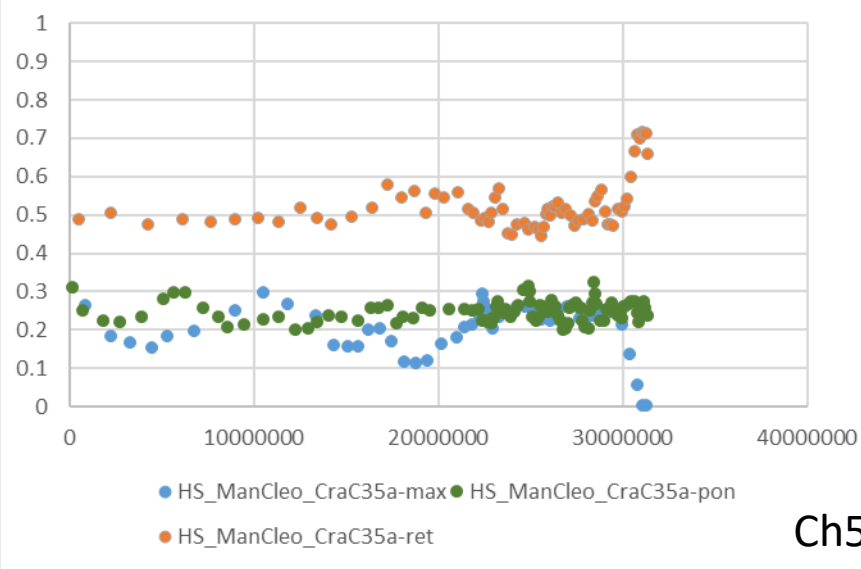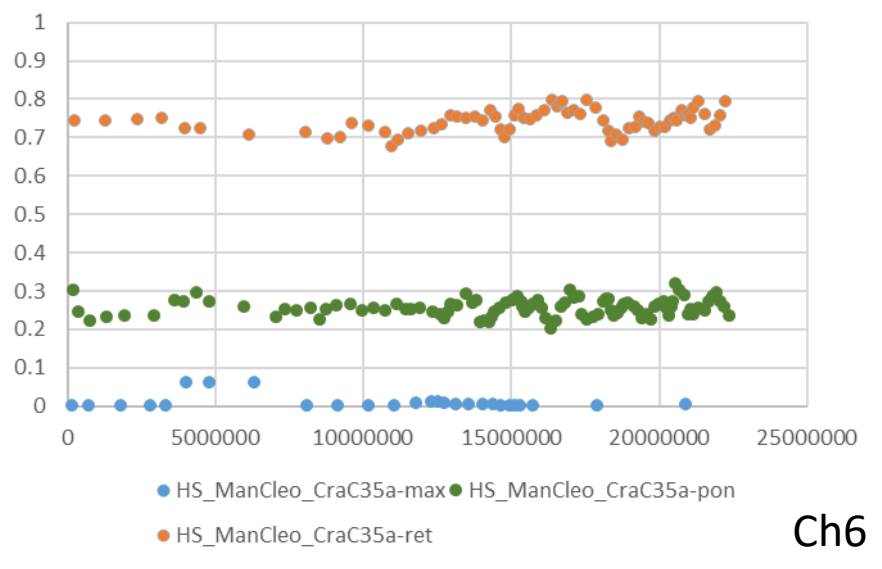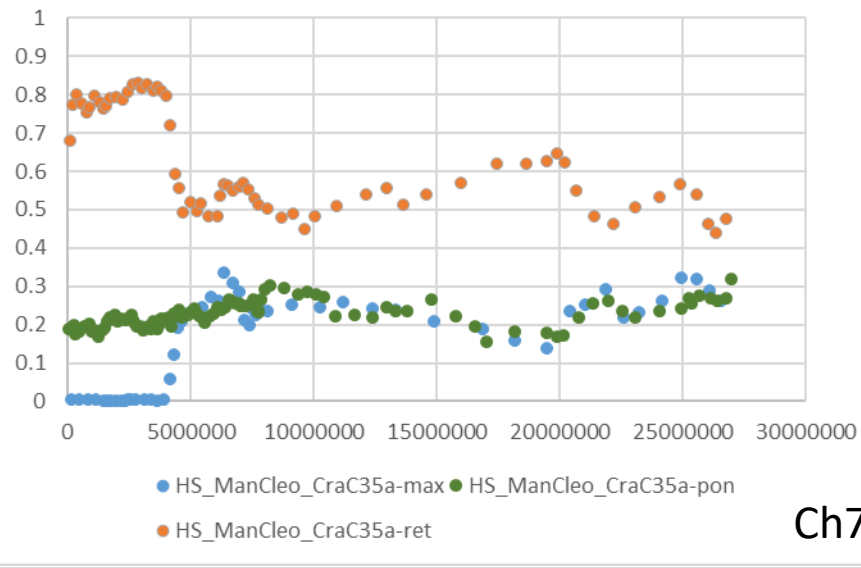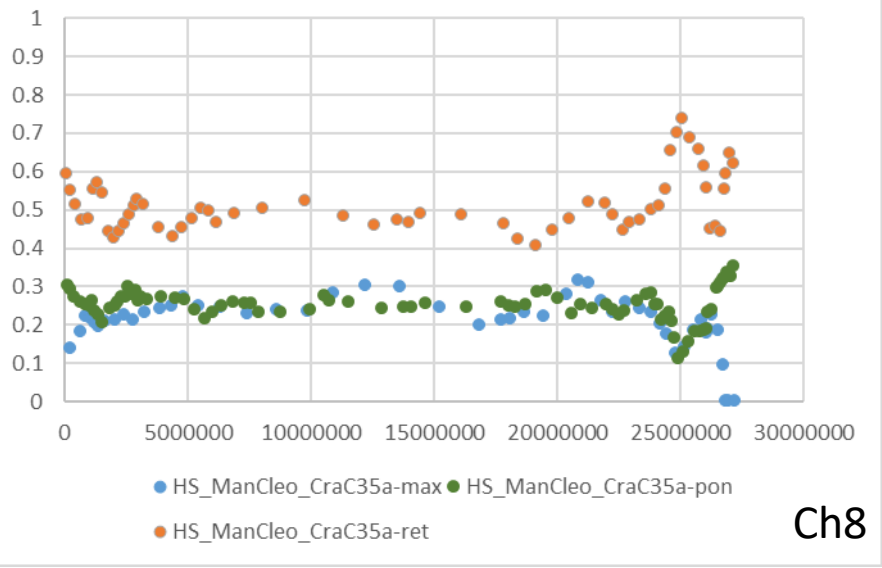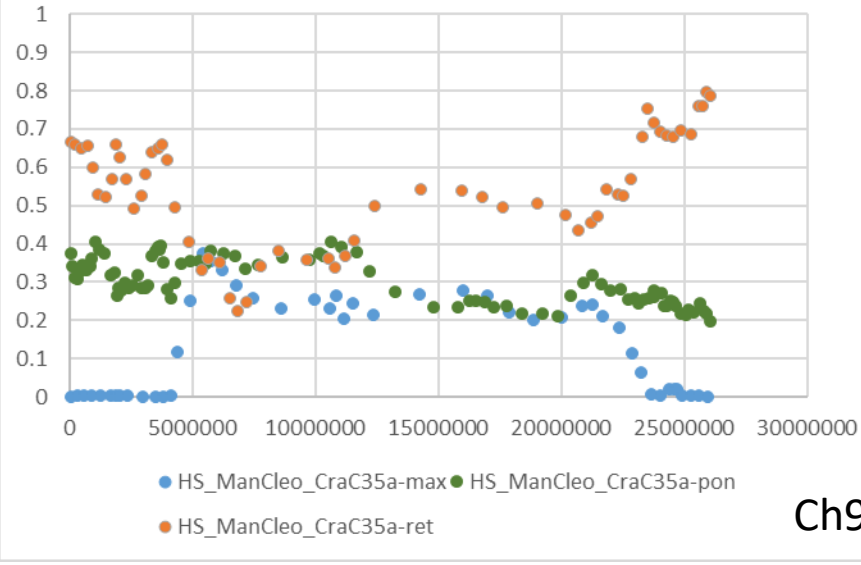

HS\_ManCleo\_CraC35a

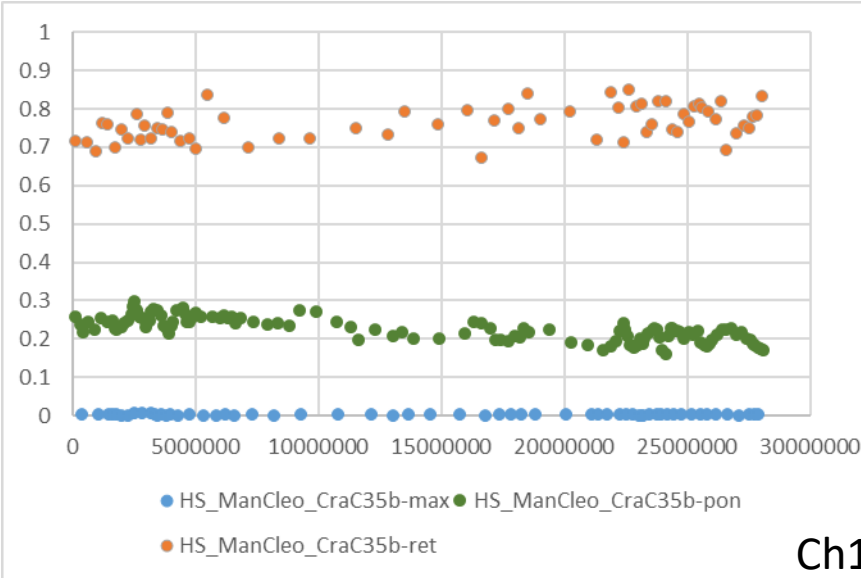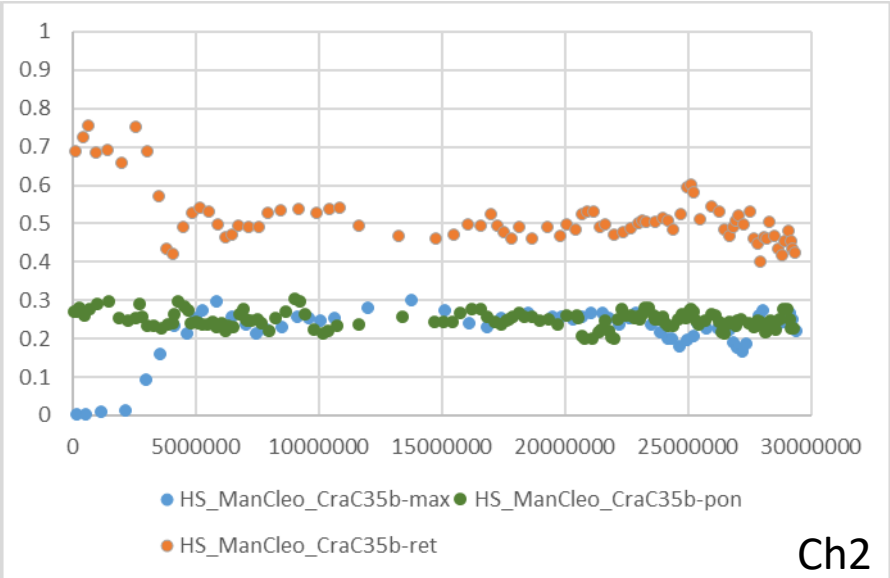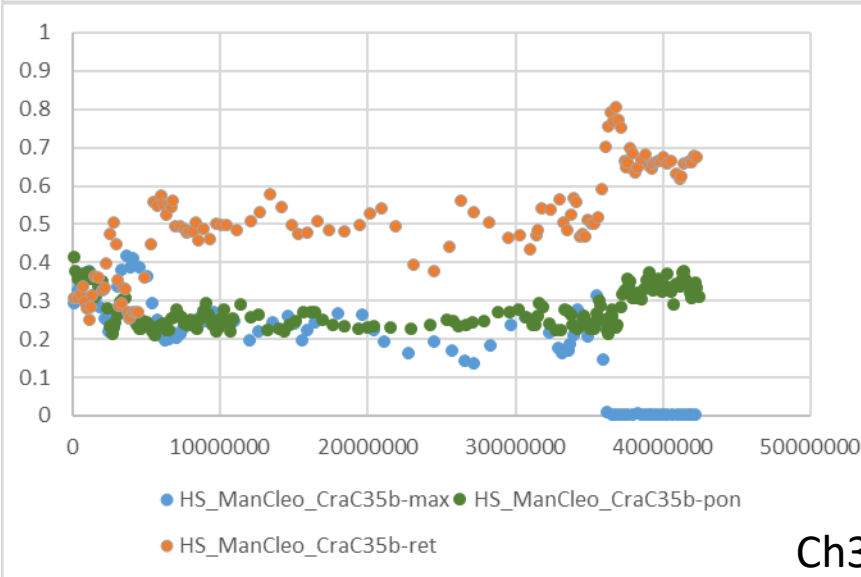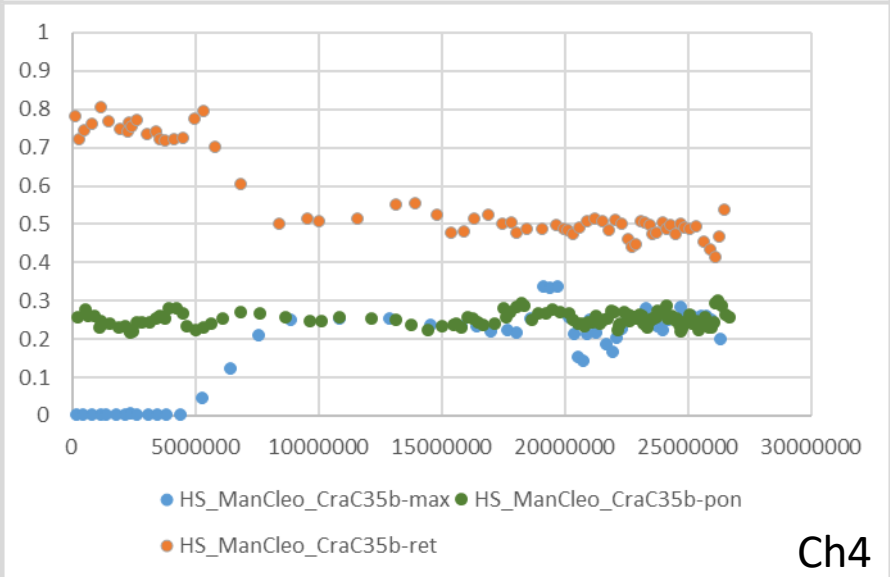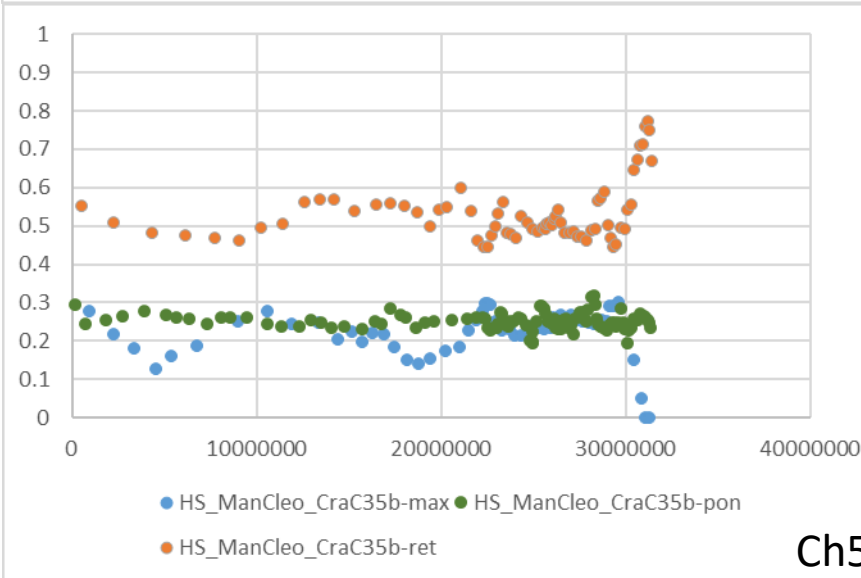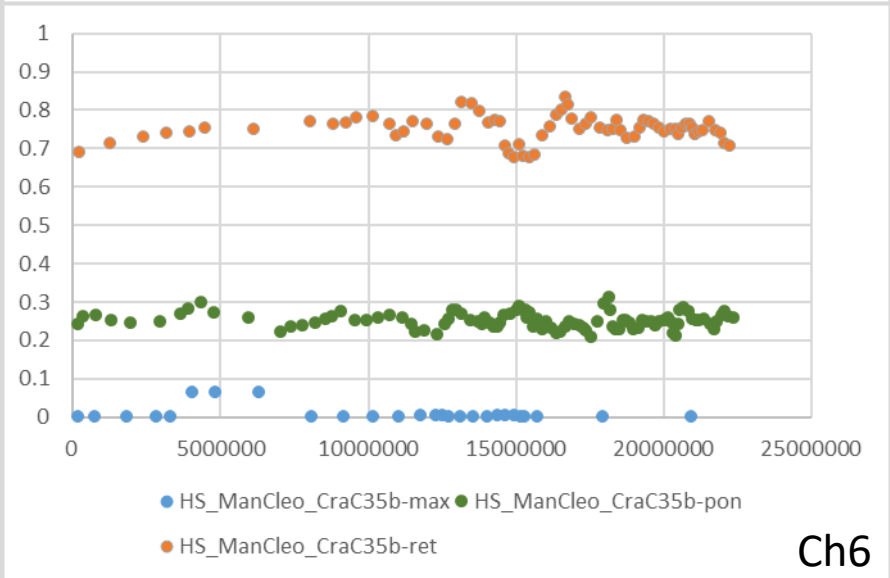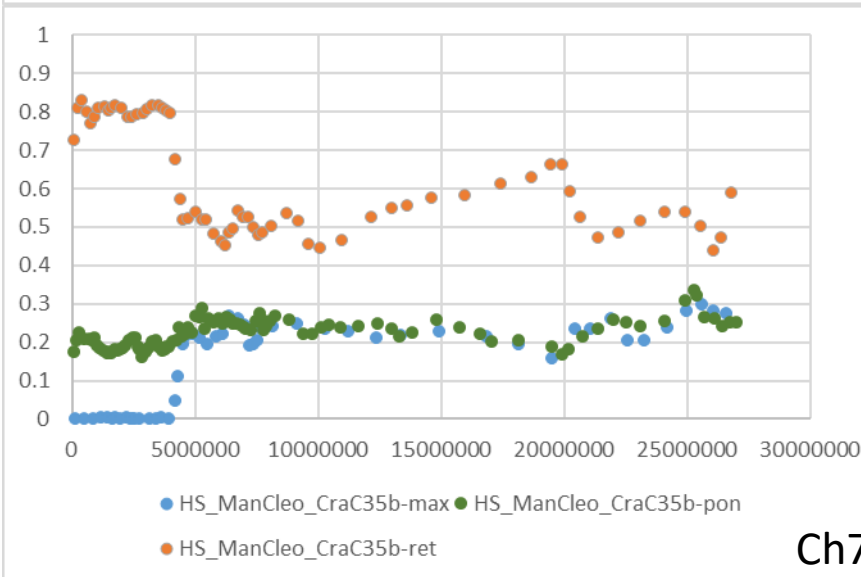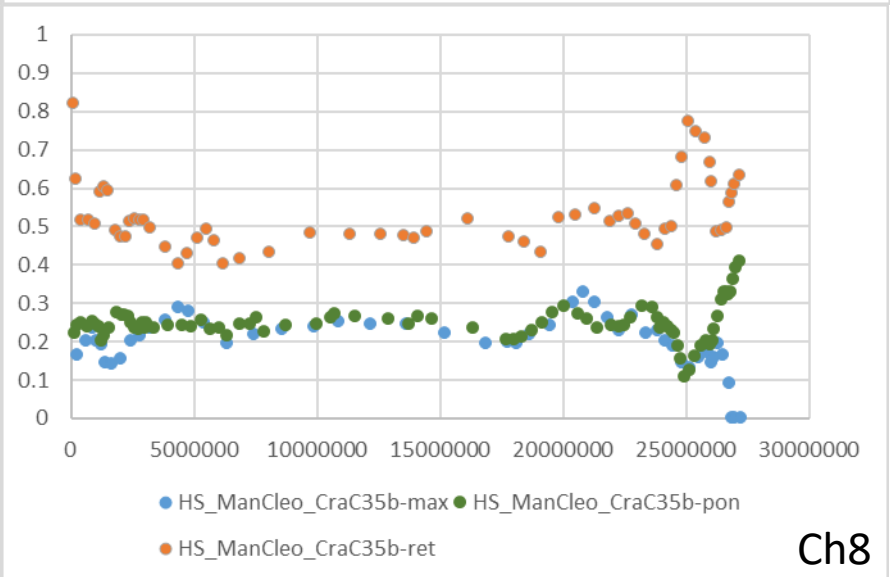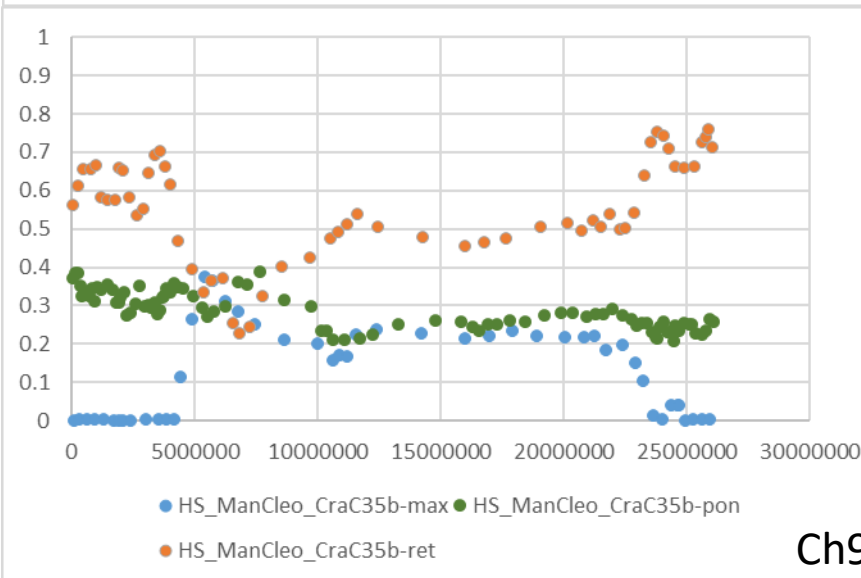

HS\_ManCleo\_CraC35b



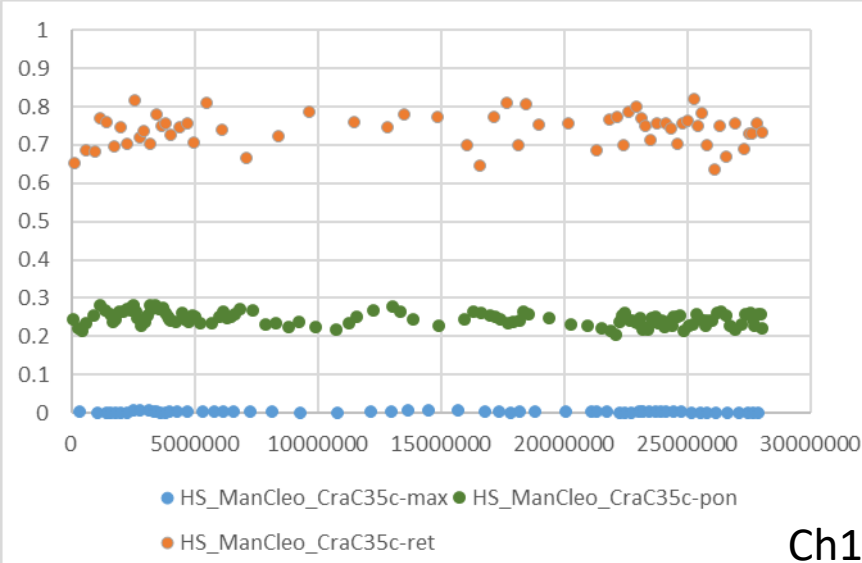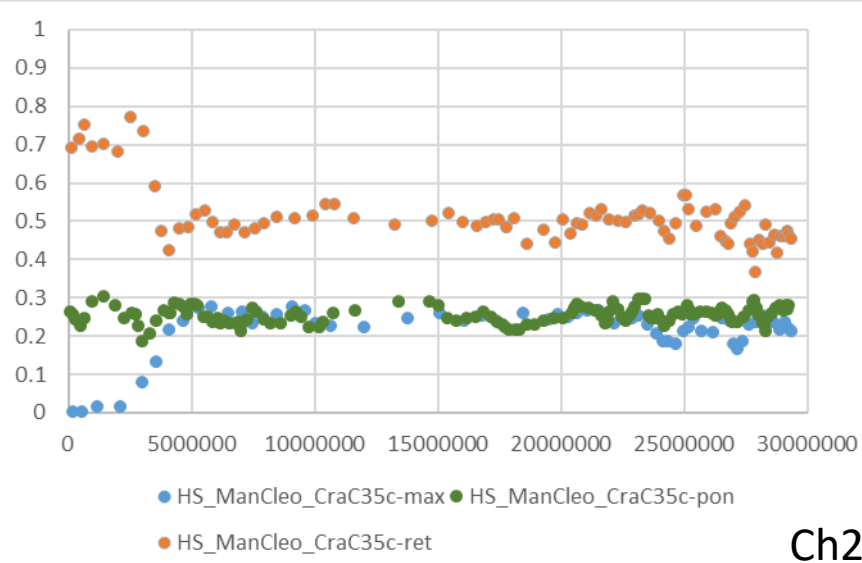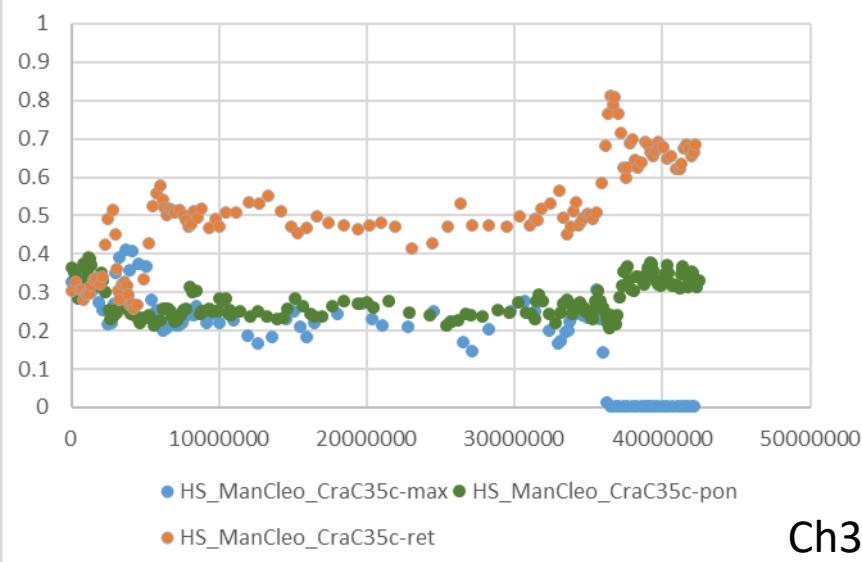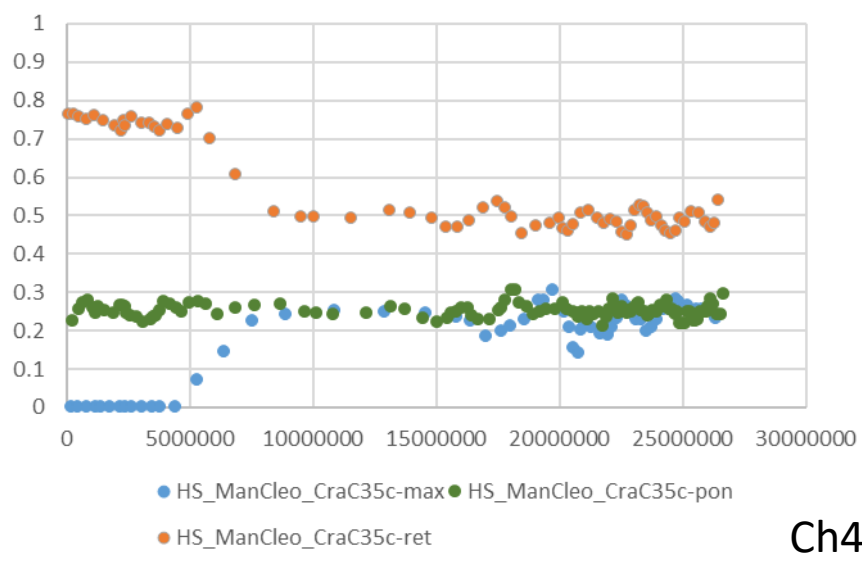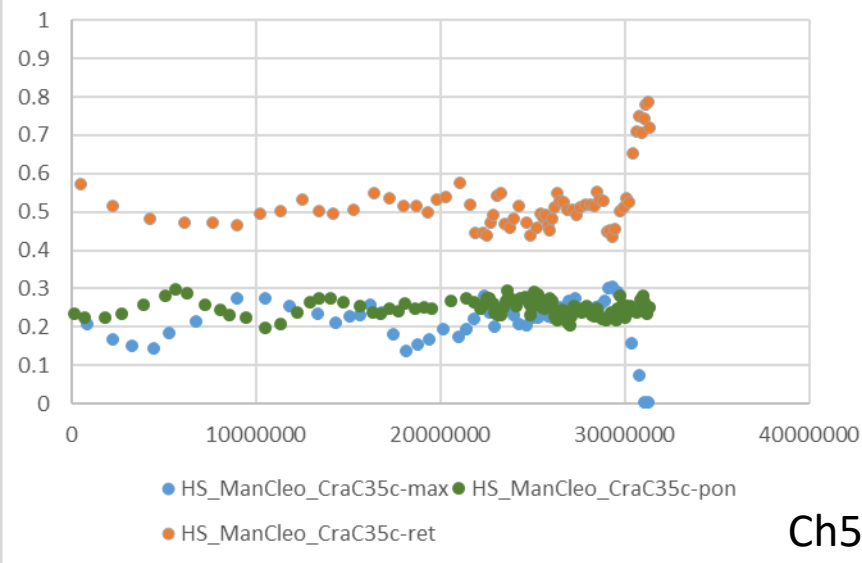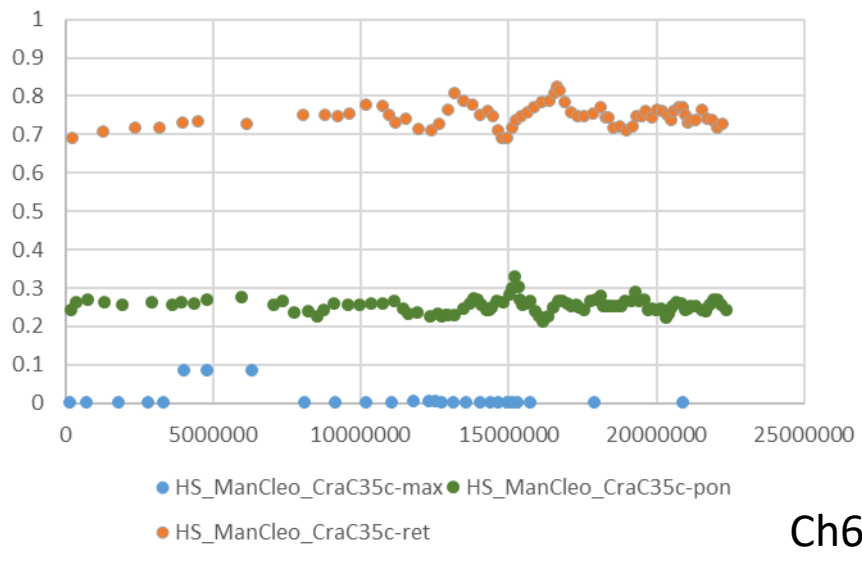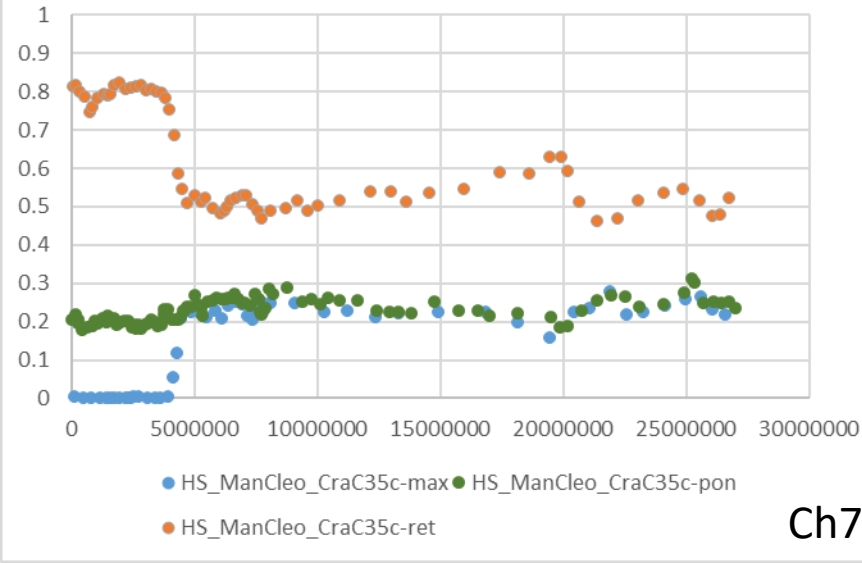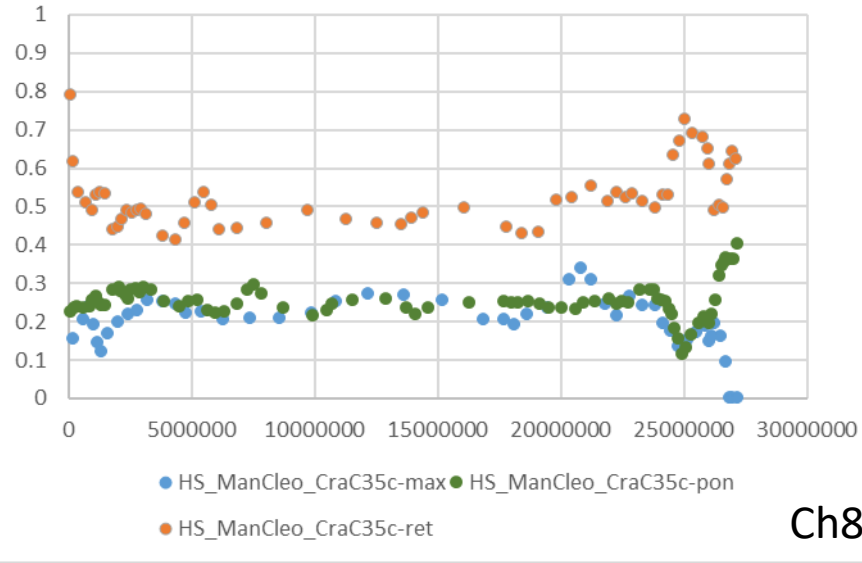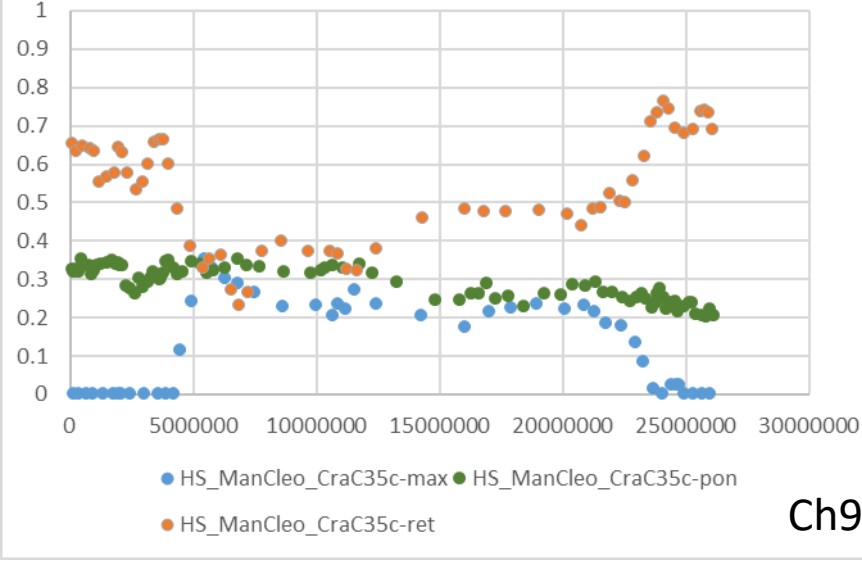

HS\_ManCleo\_CraC35c

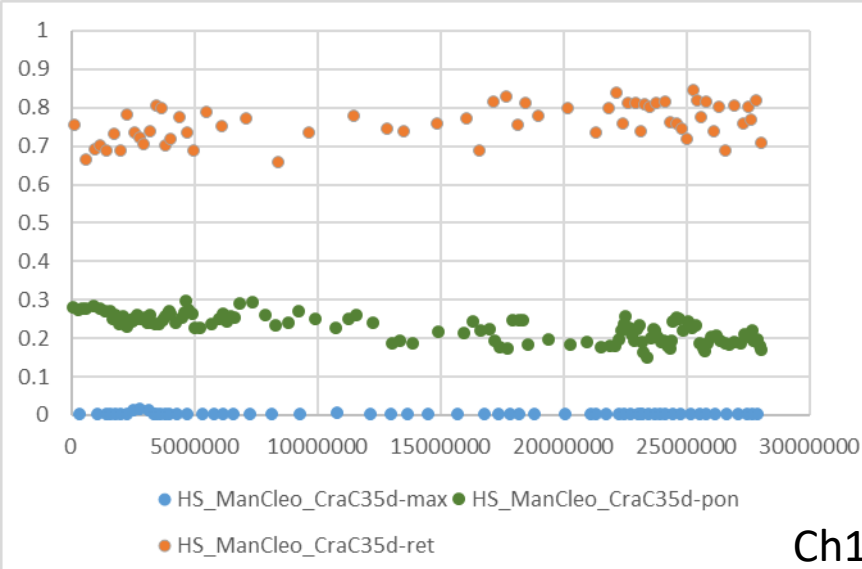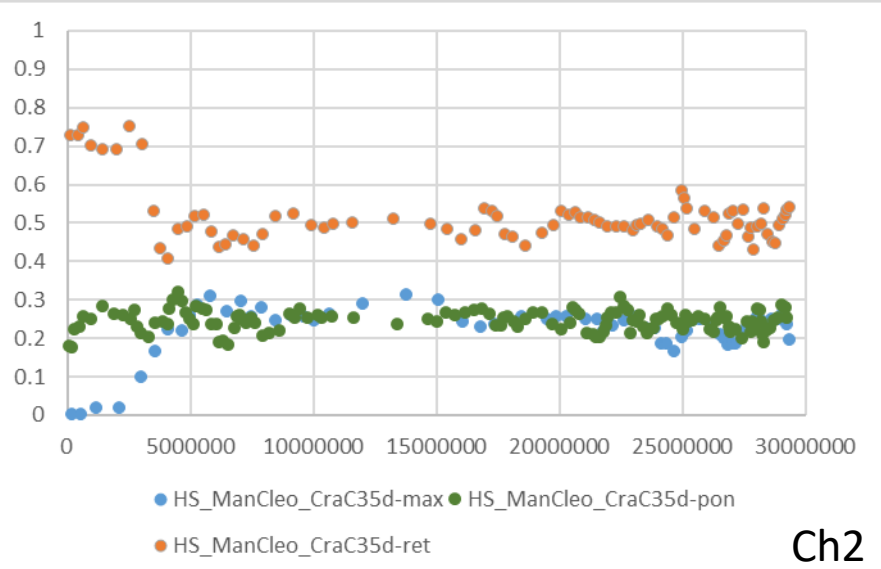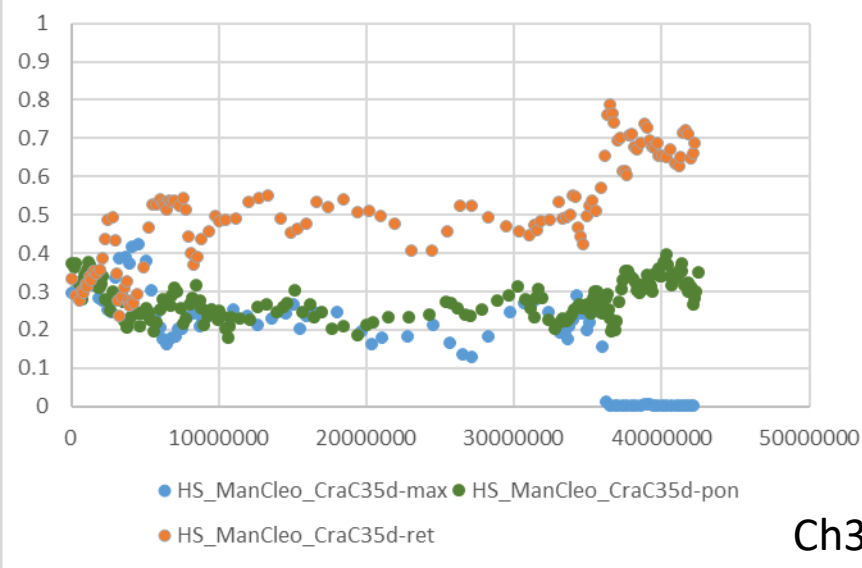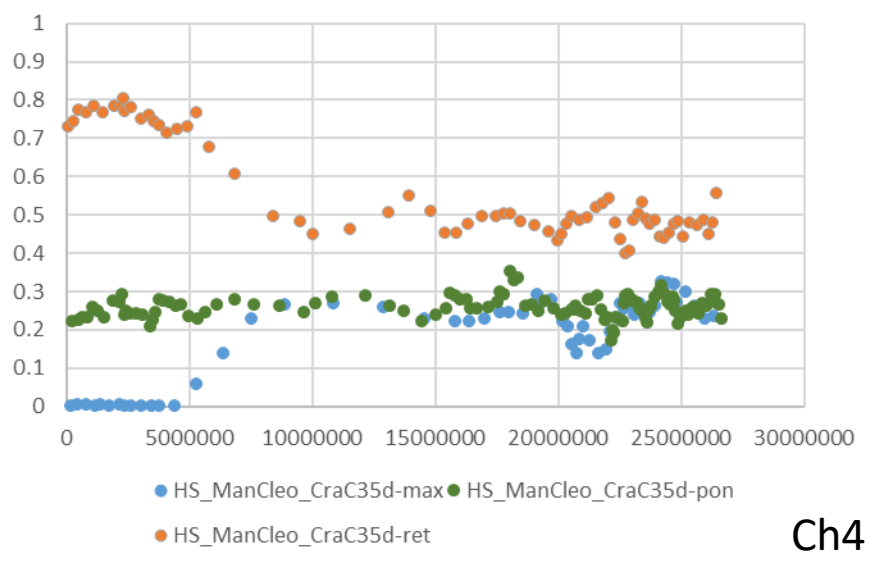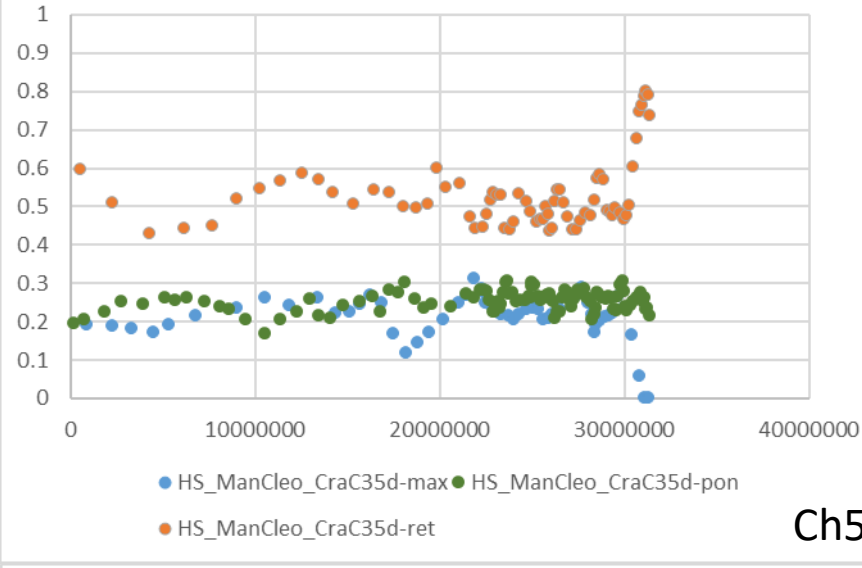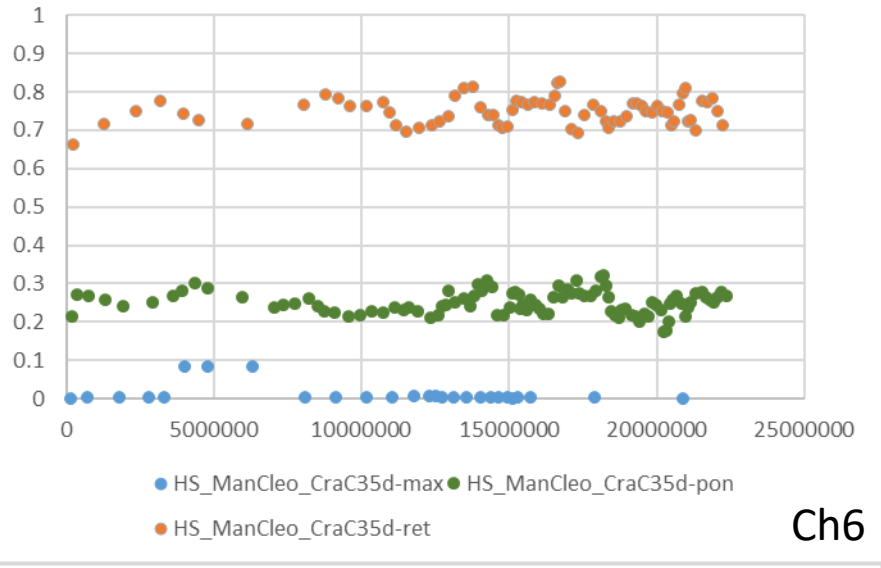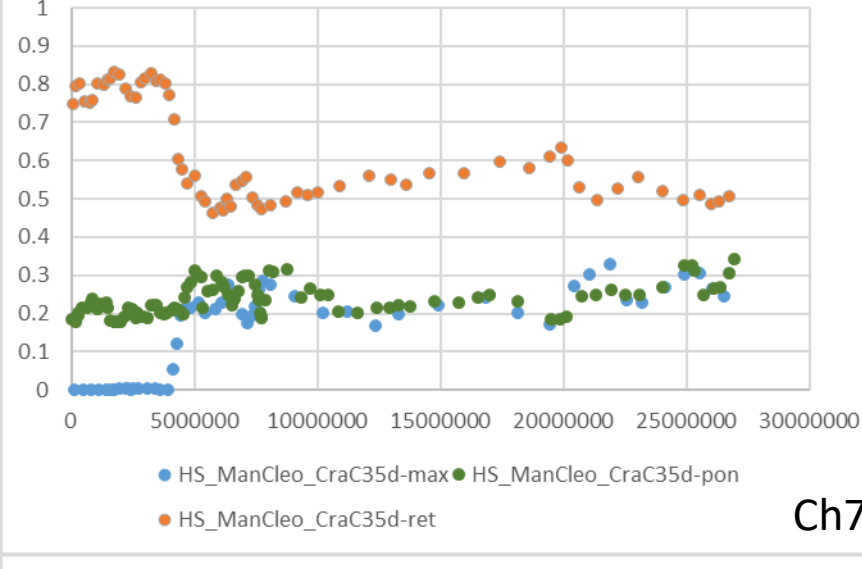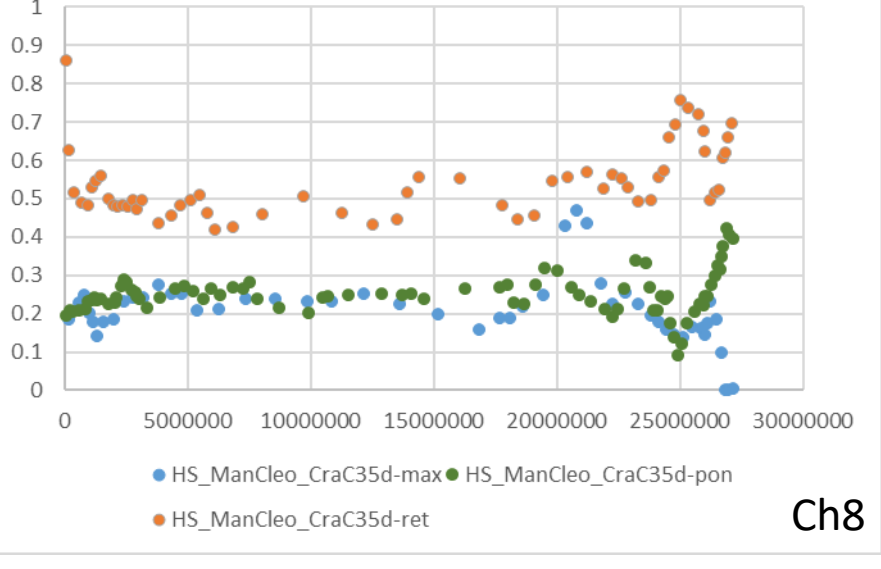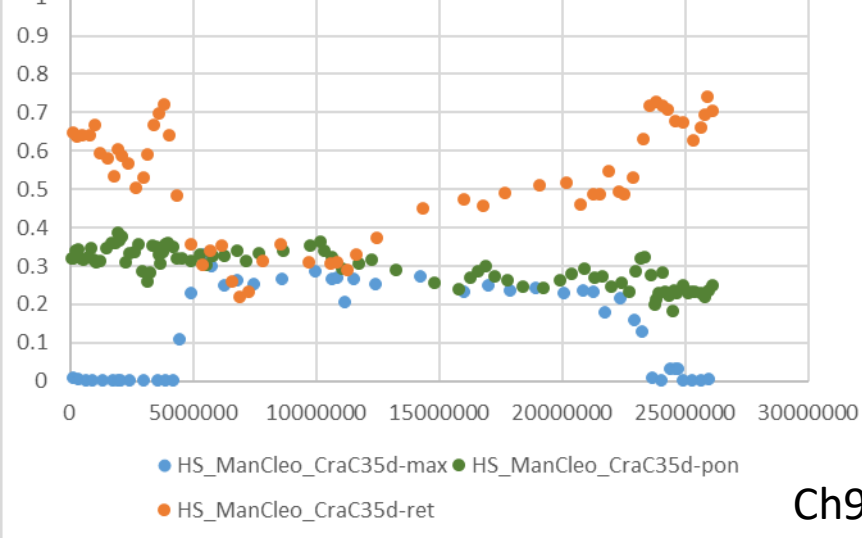

HS\_MandCleo\_CraC35d



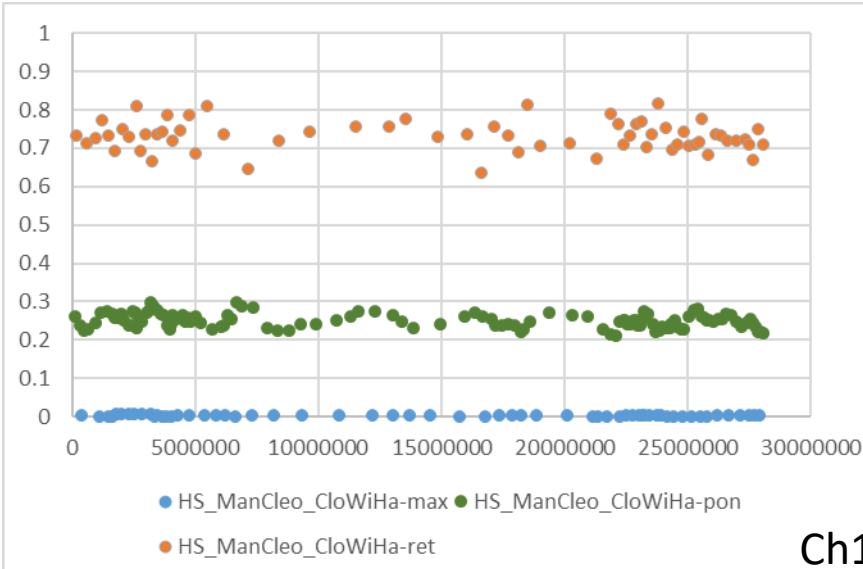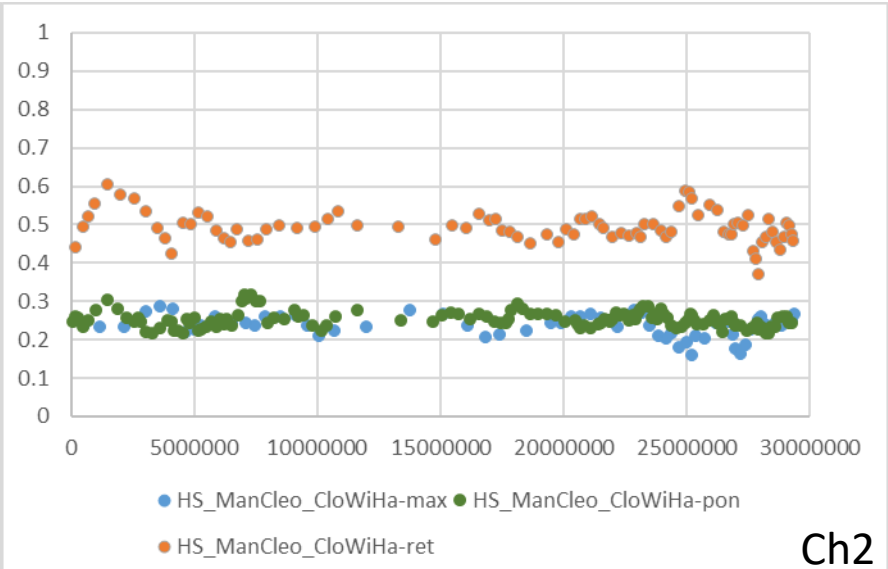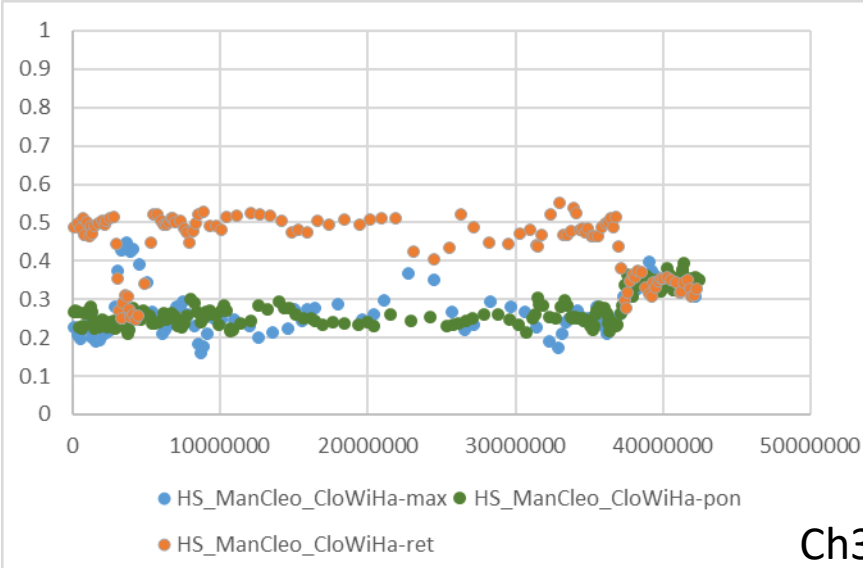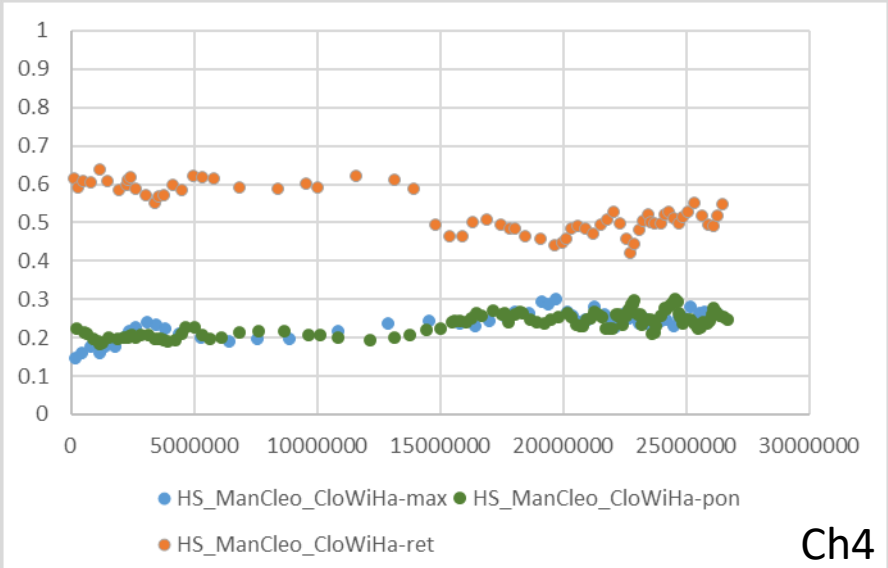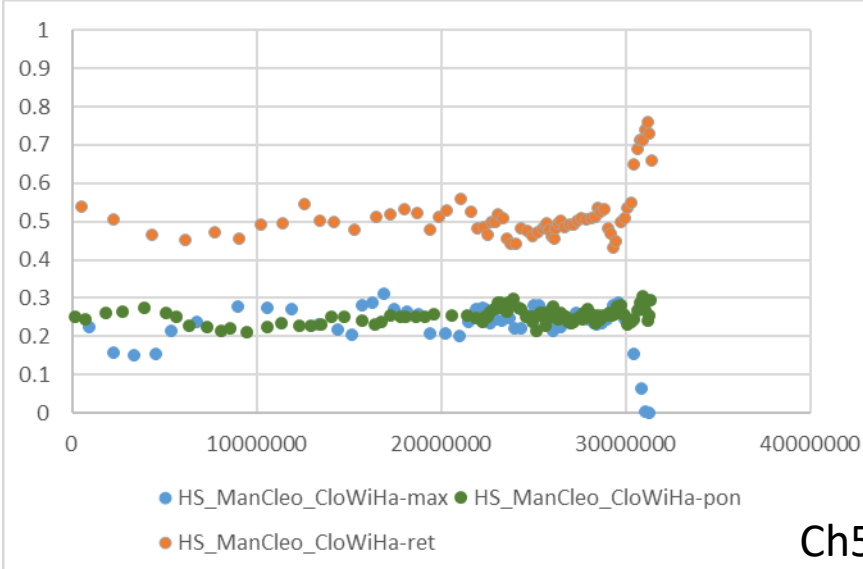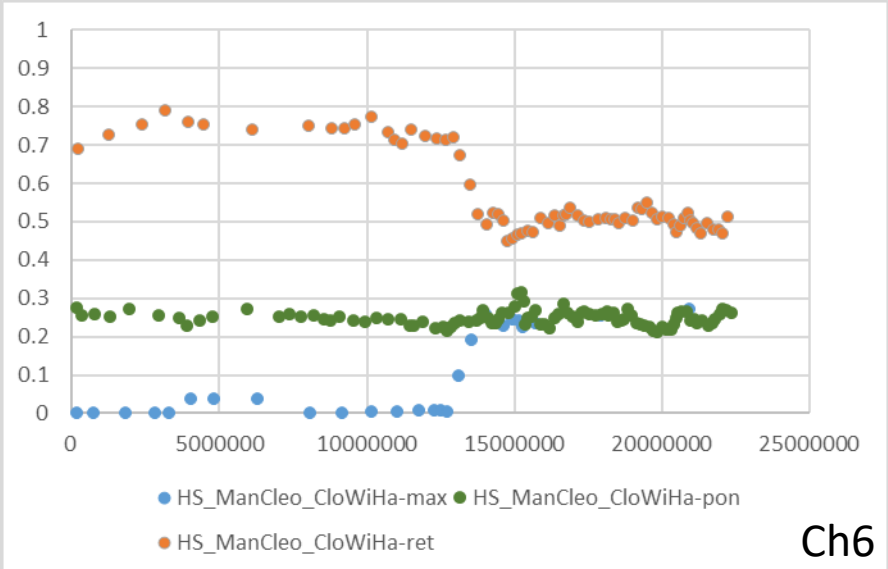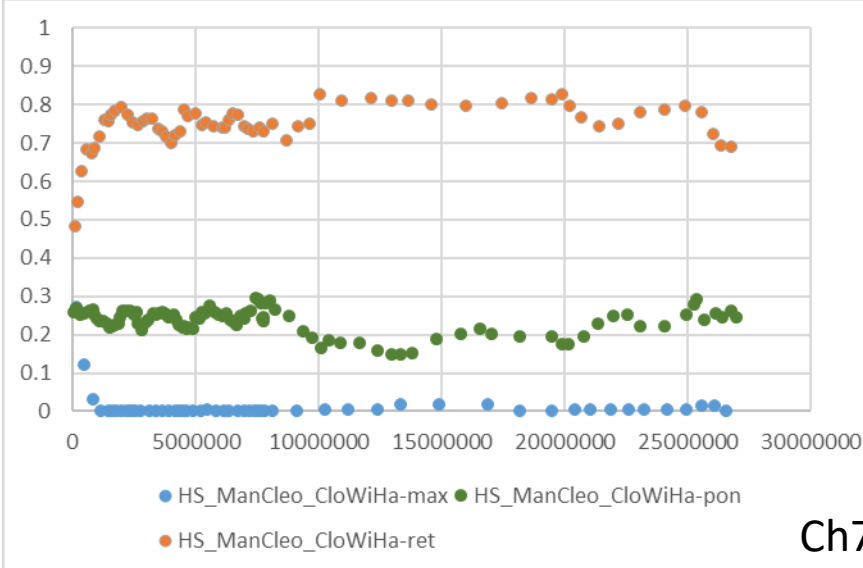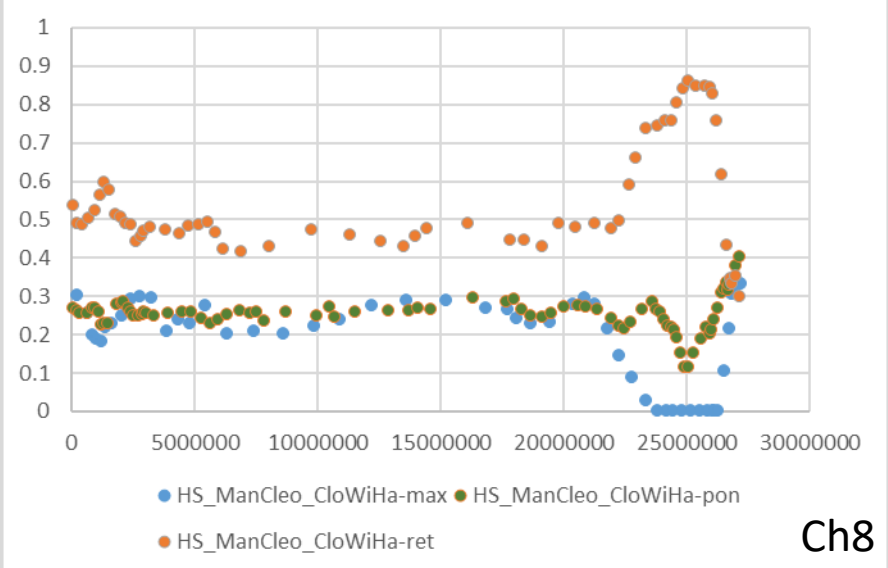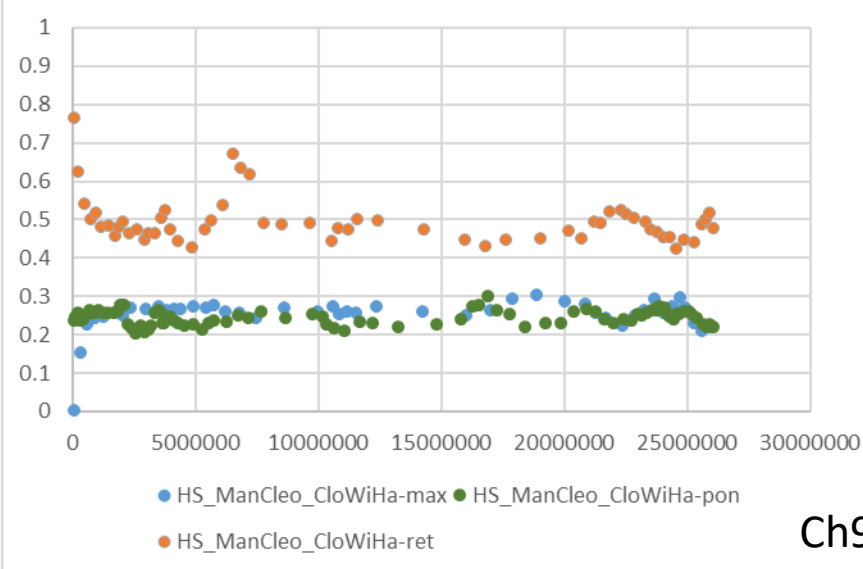

HS\_ManCleo\_CloWiHa

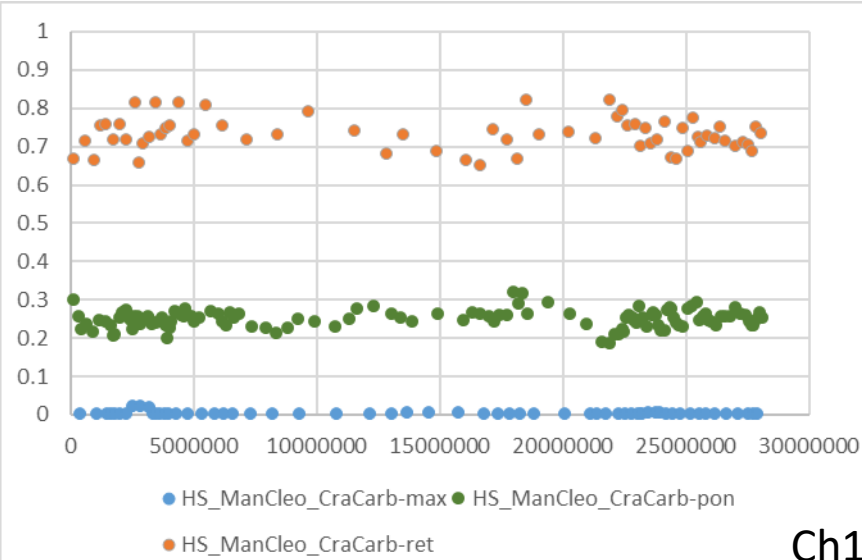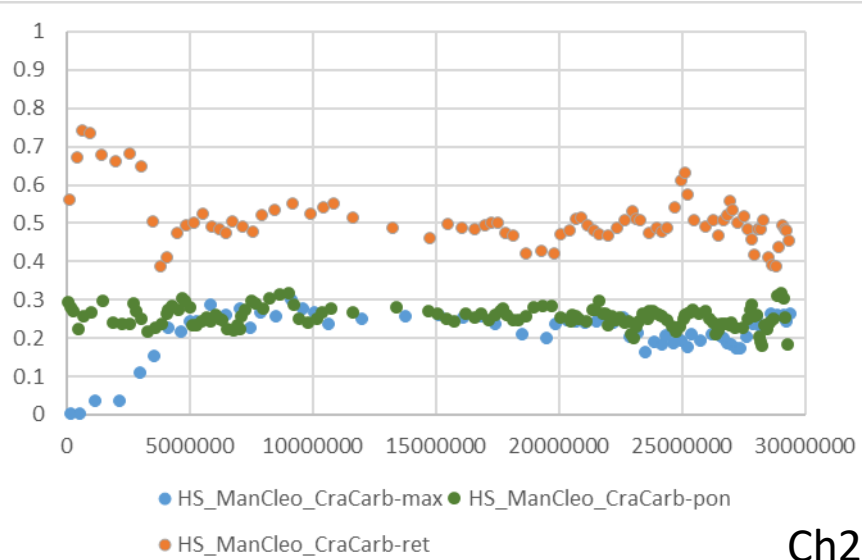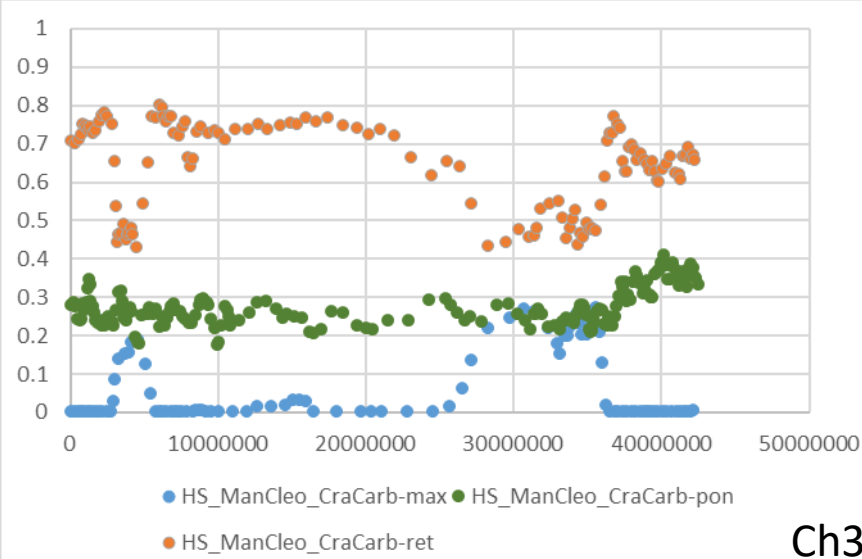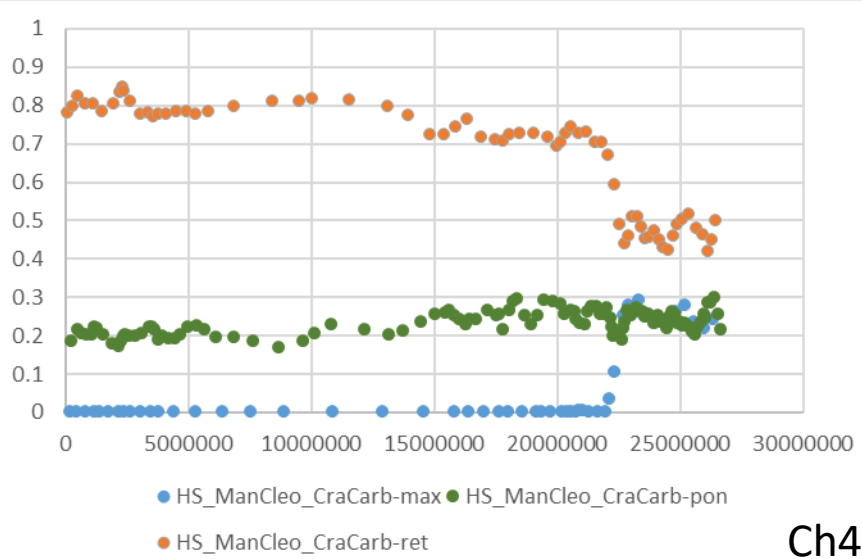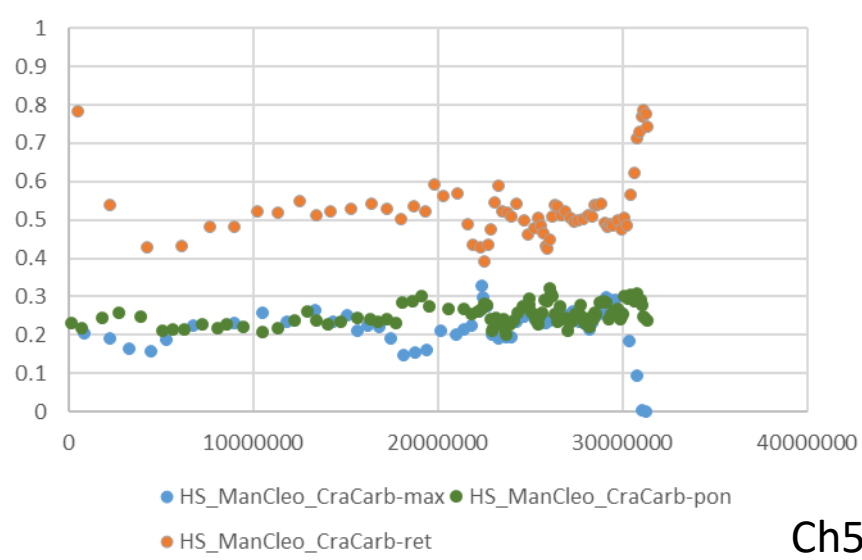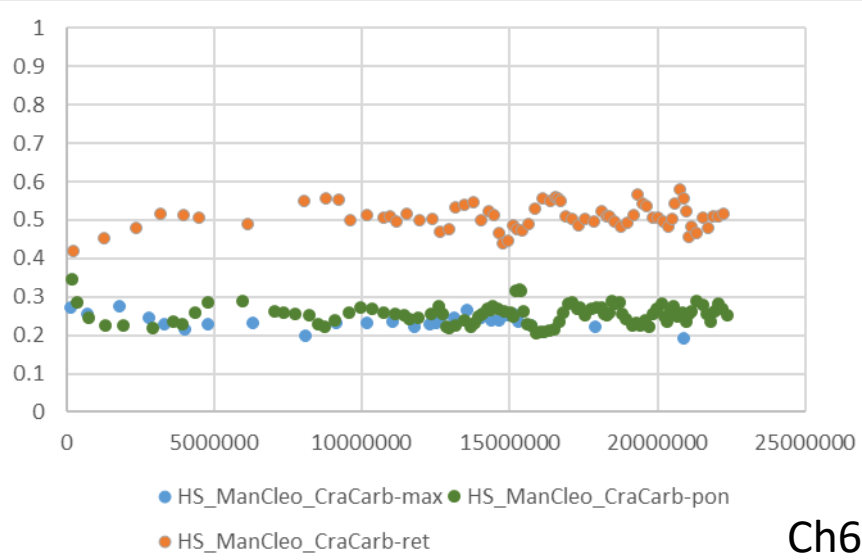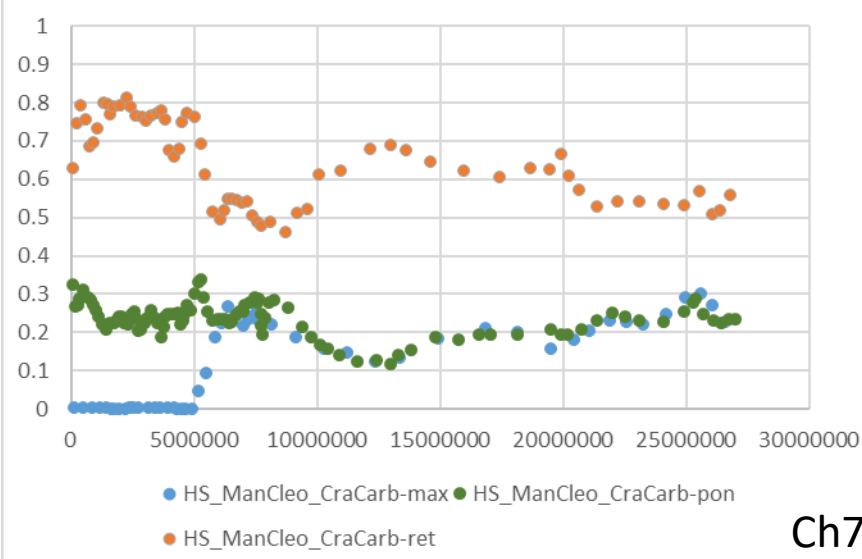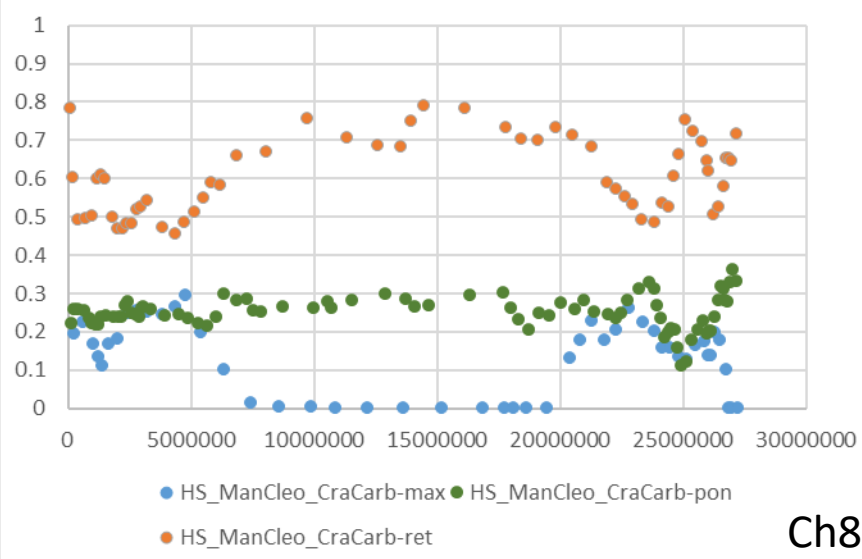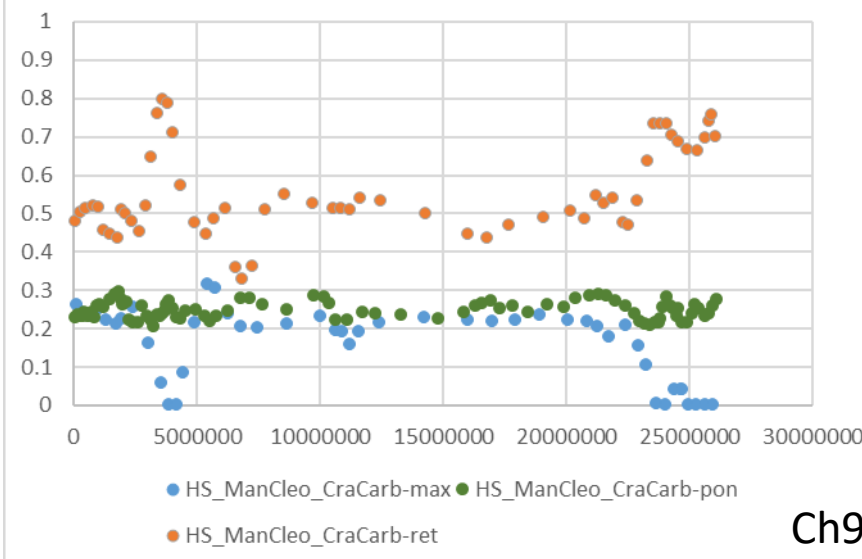

HS\_ManCleo\_CraCarb

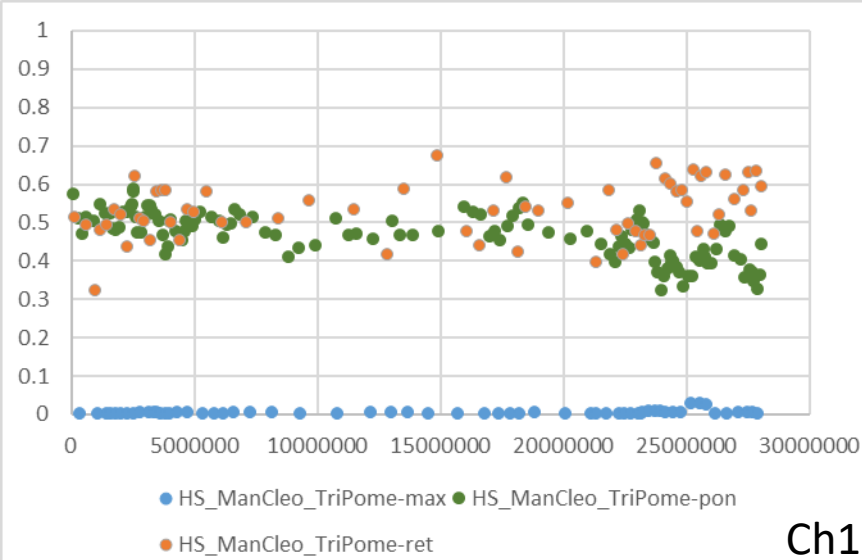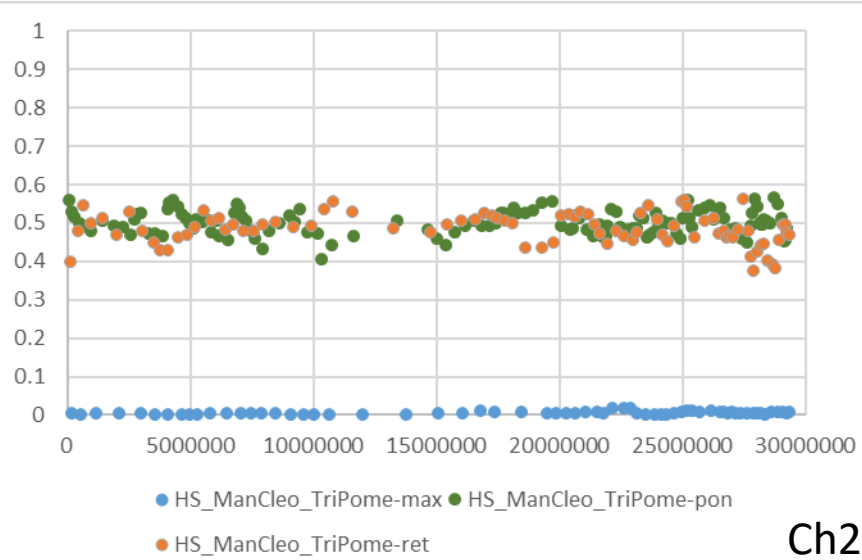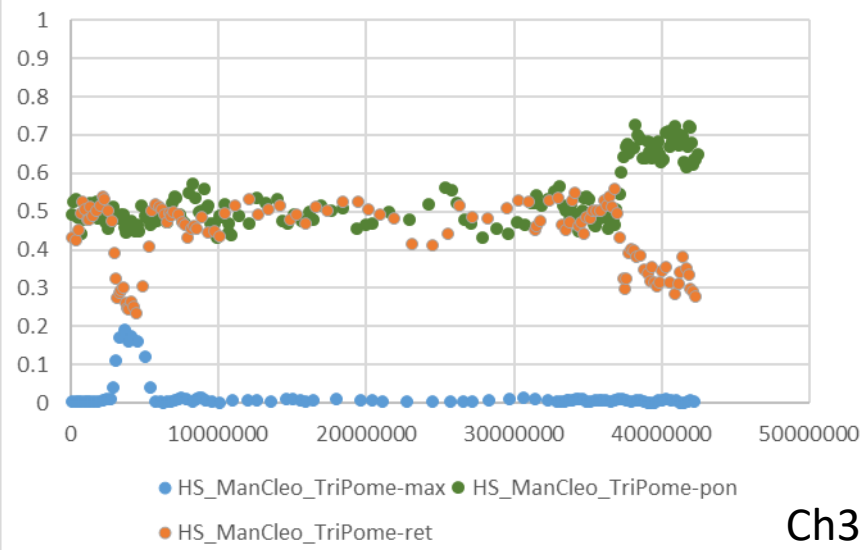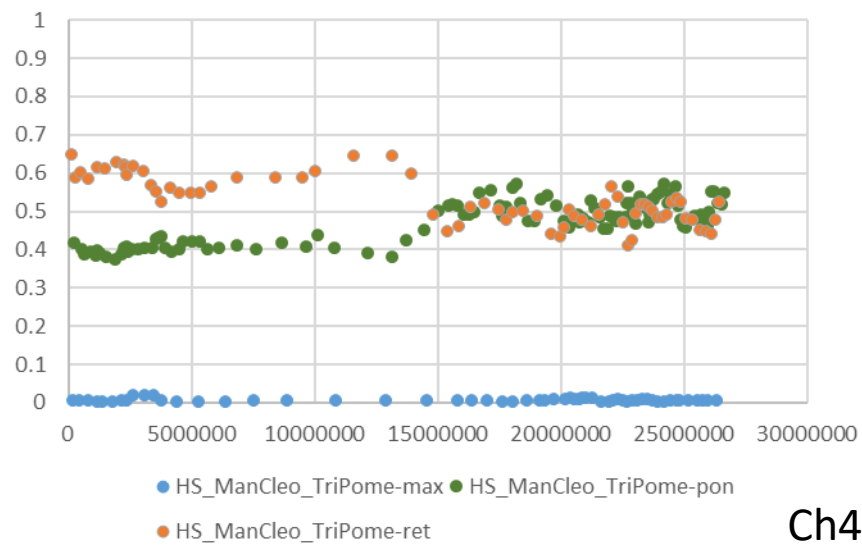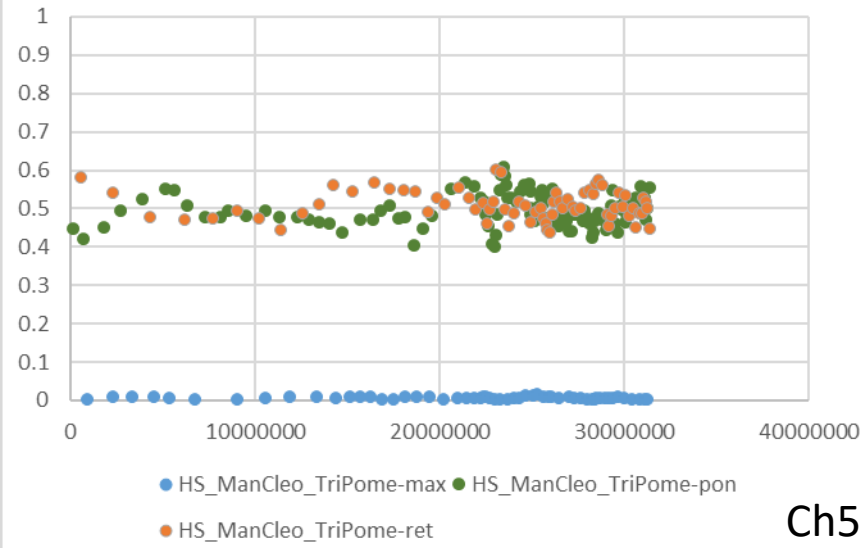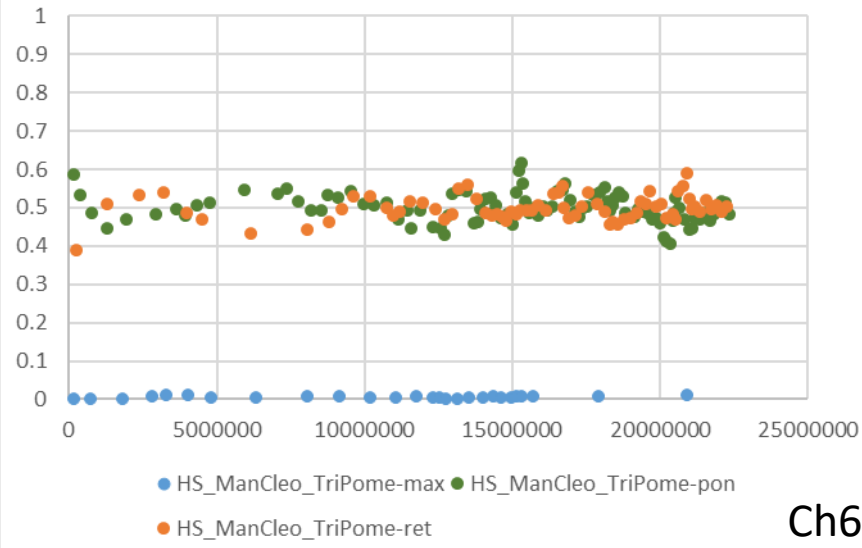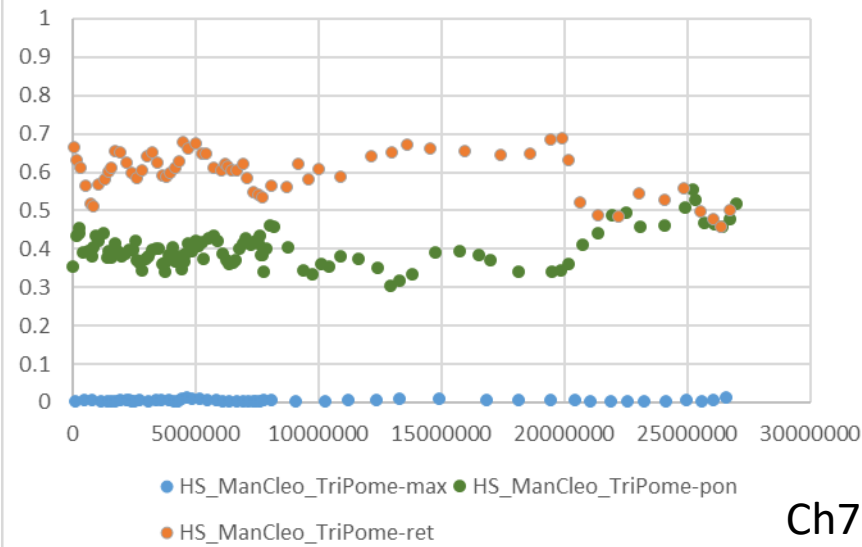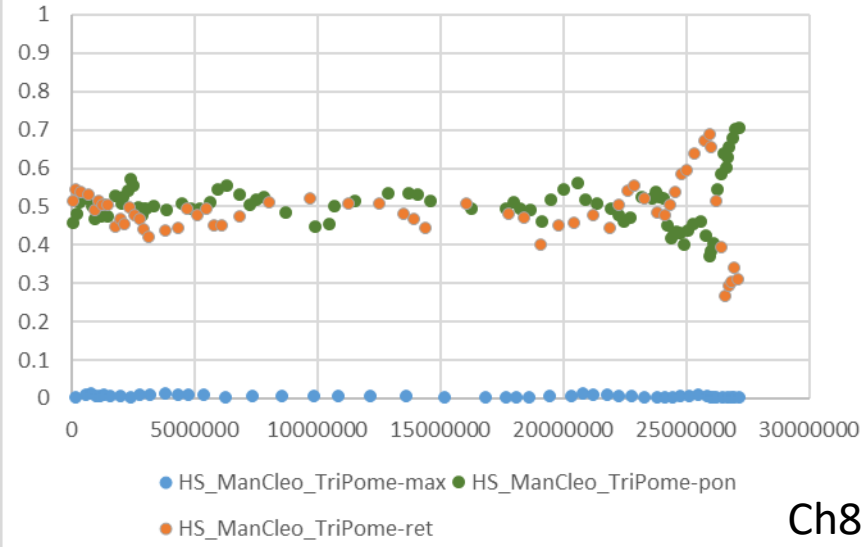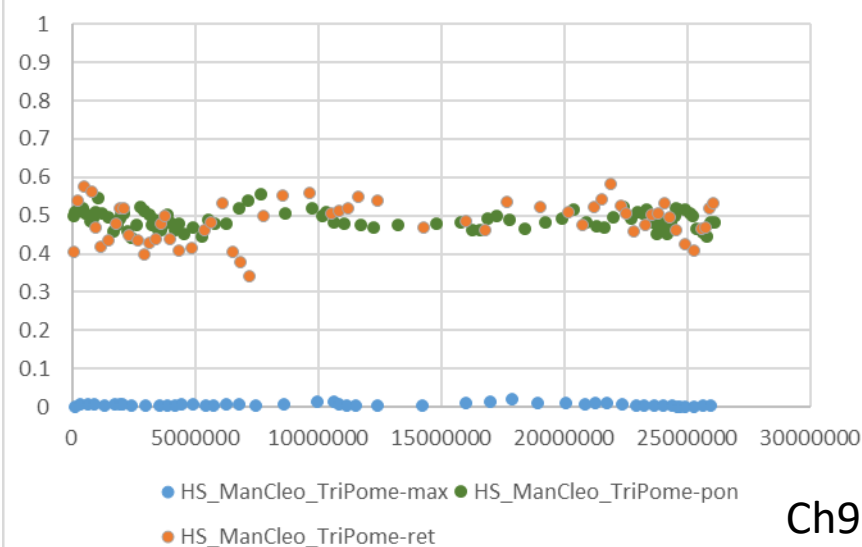

HS\_ManCleo\_TriPome

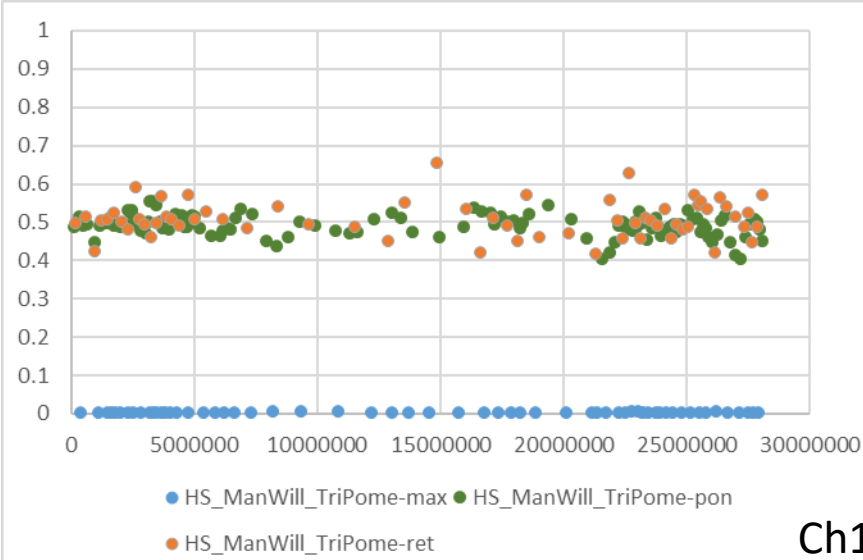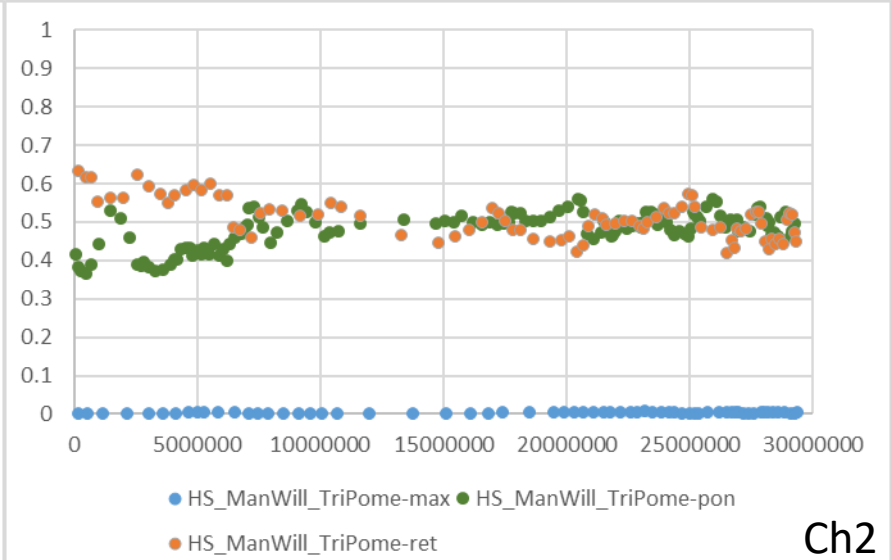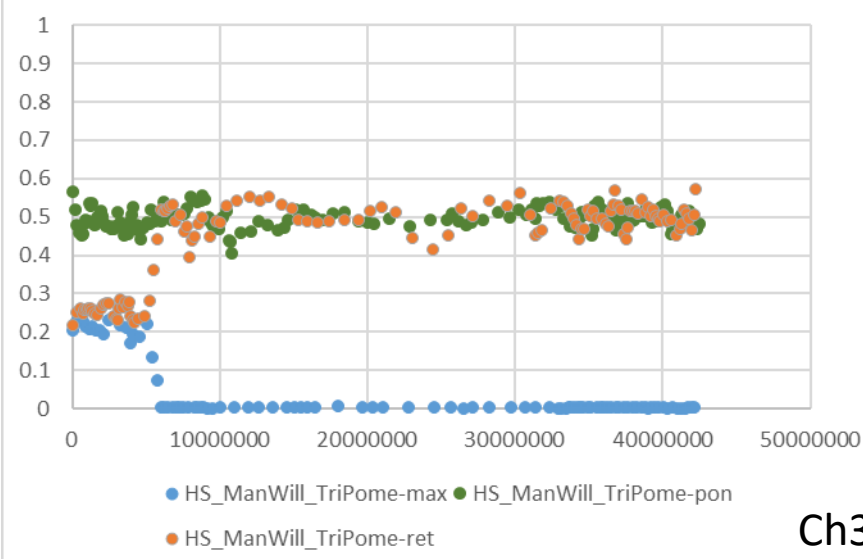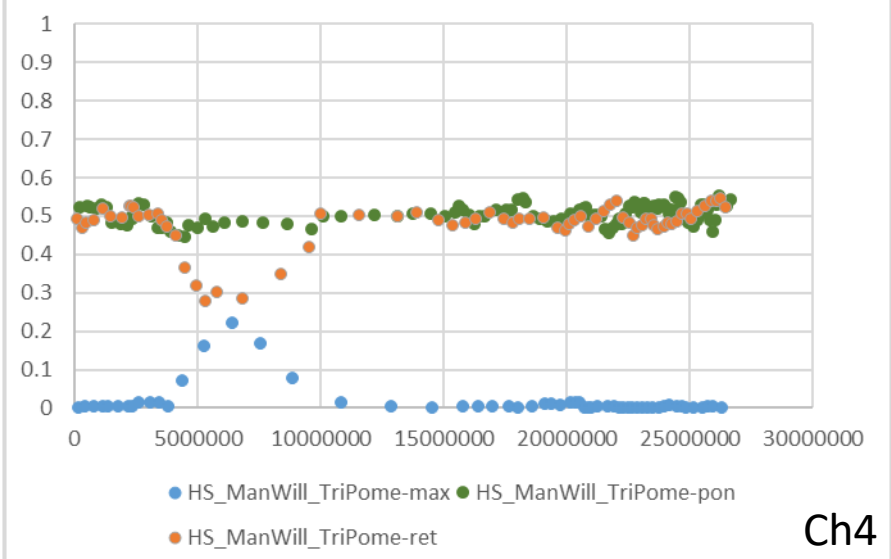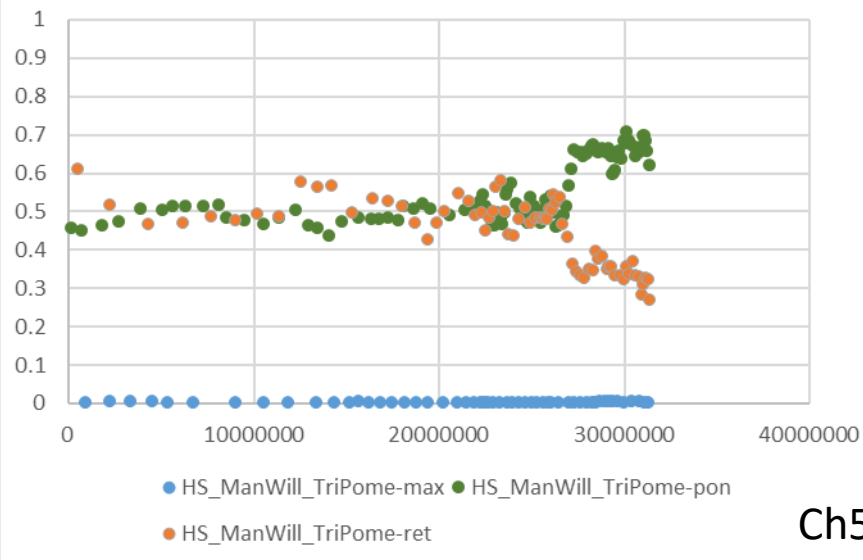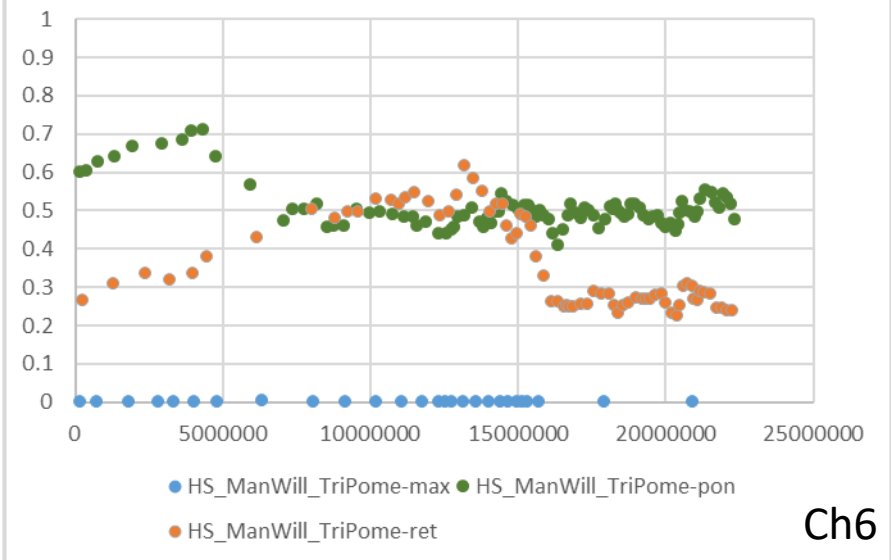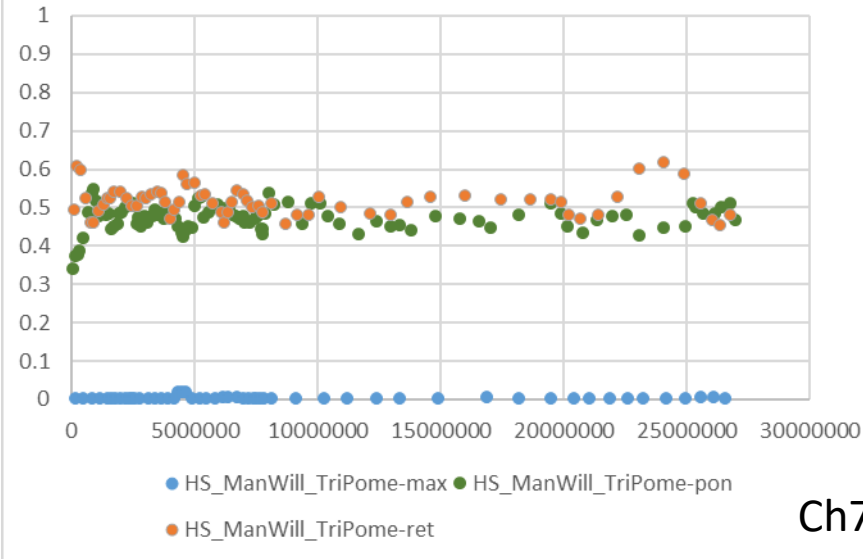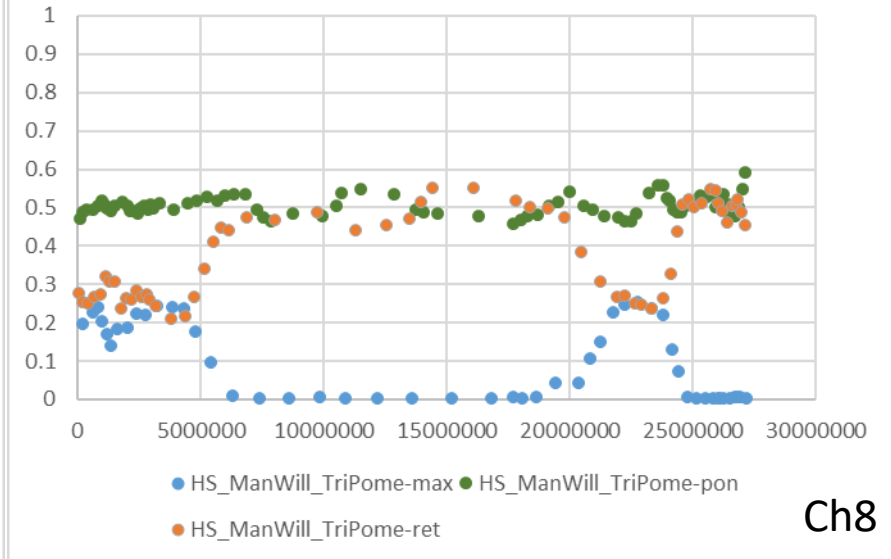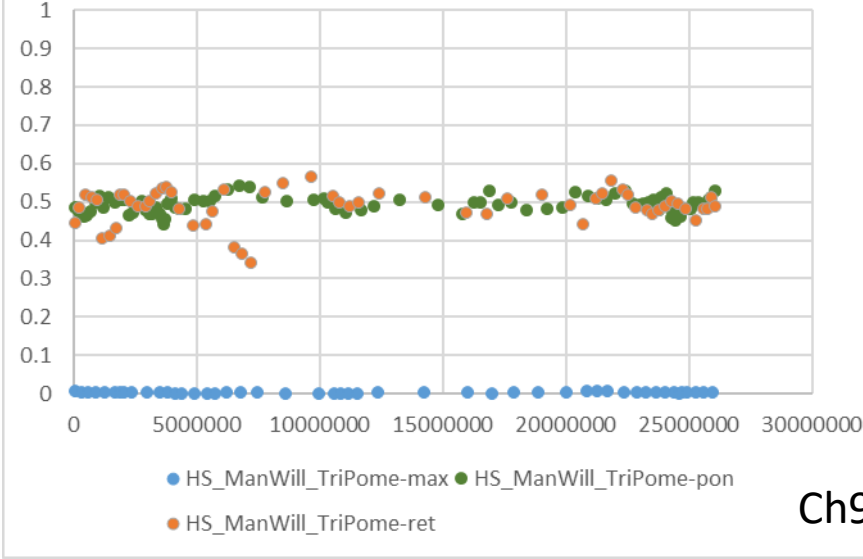

HS\_ManWill\_TriPome



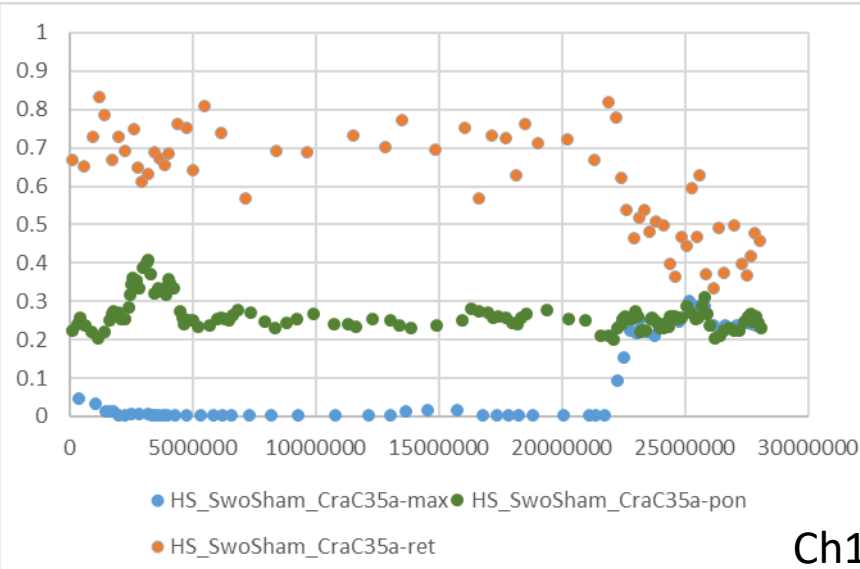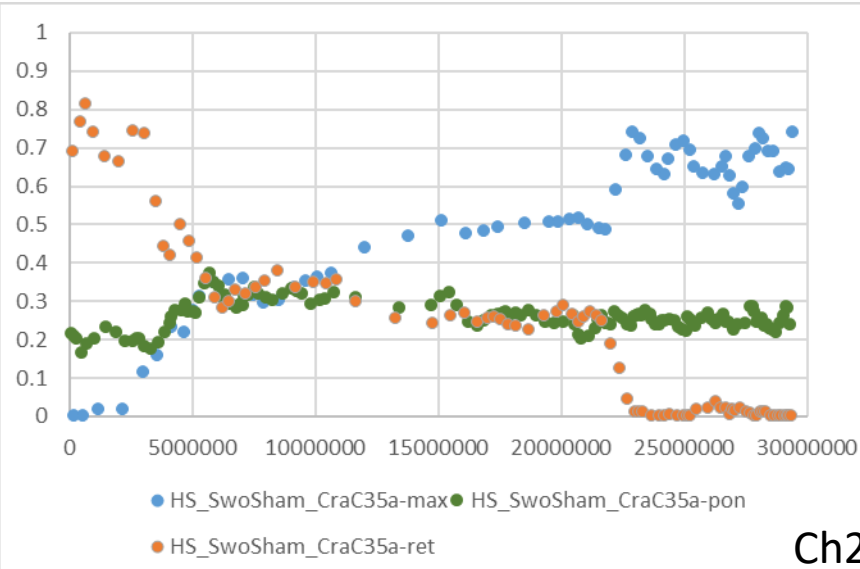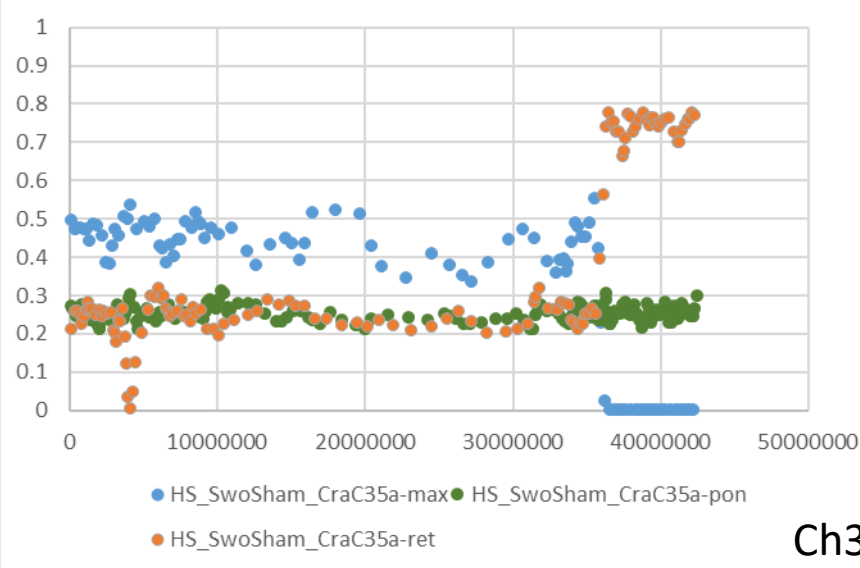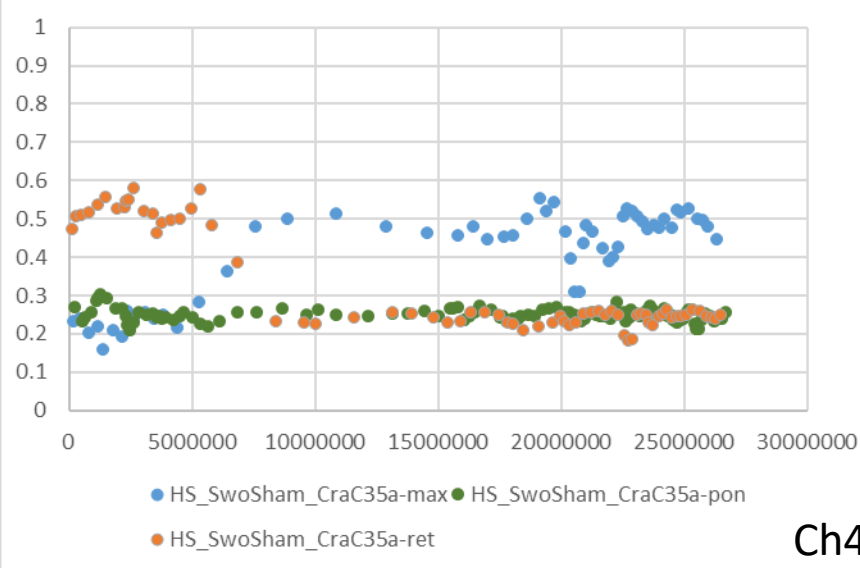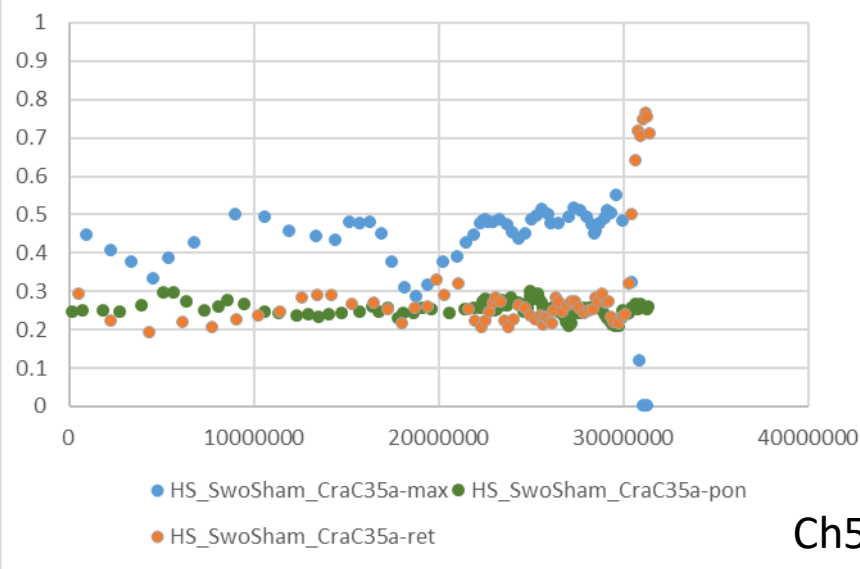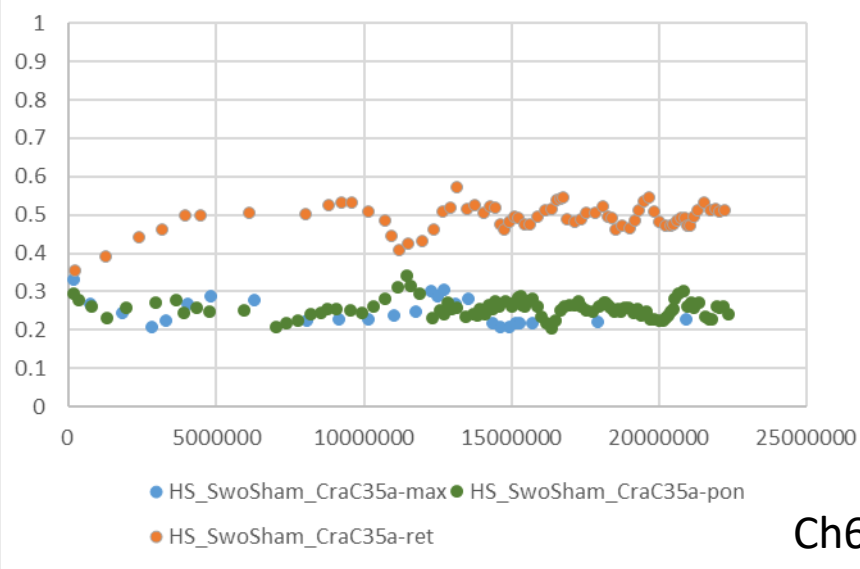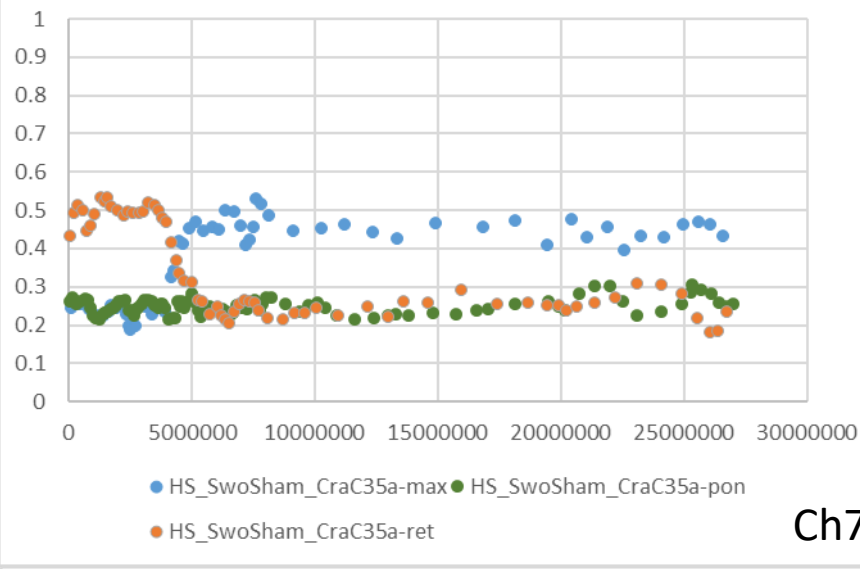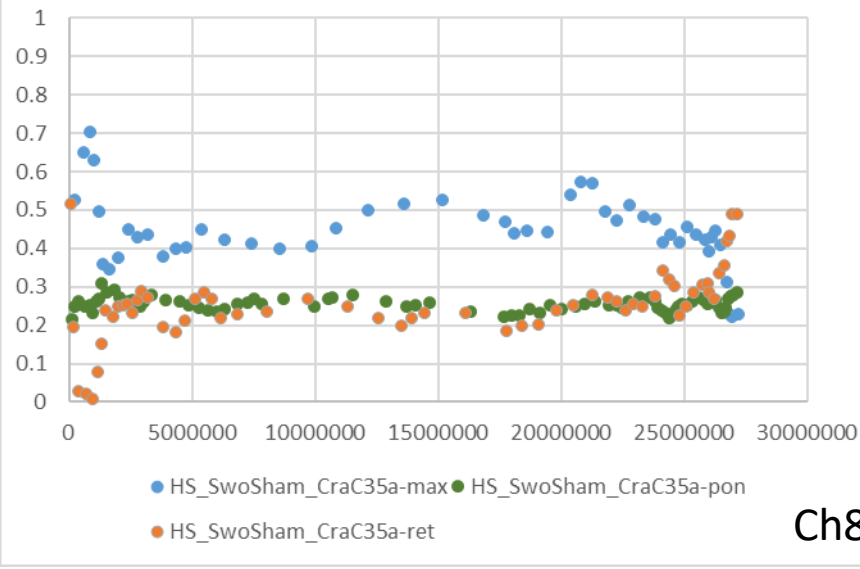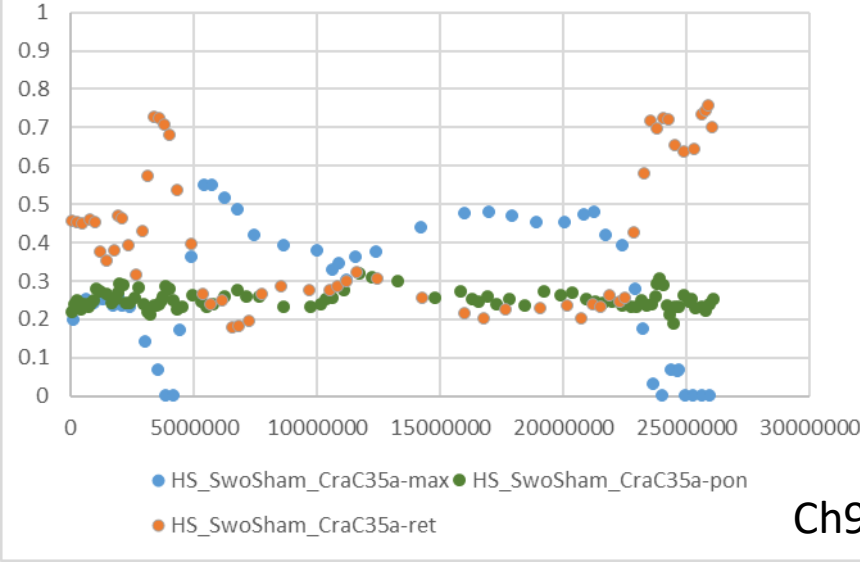

HS\_SwoSham\_CraC35a

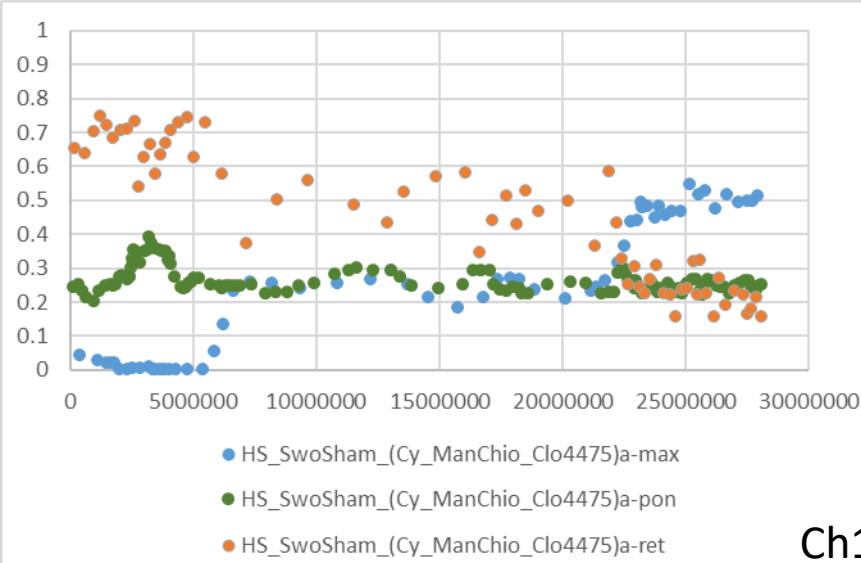

Ch1

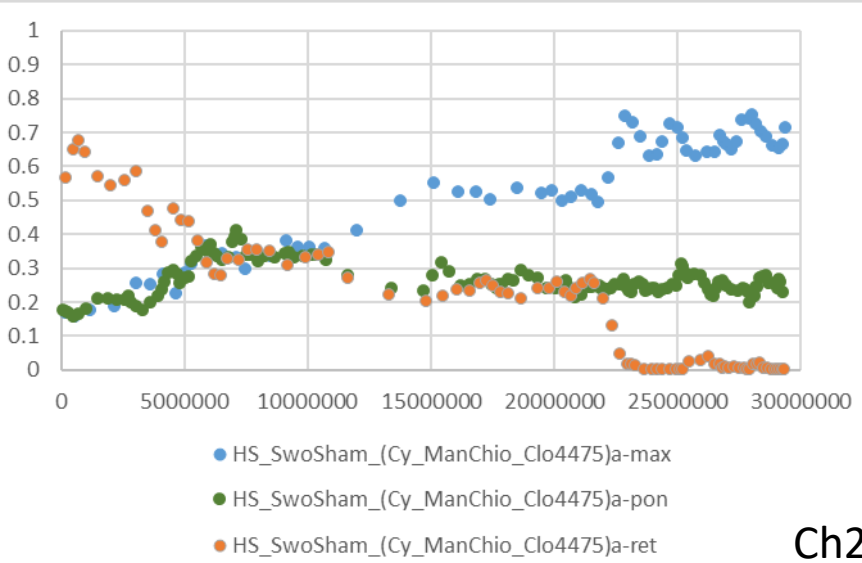

Ch2

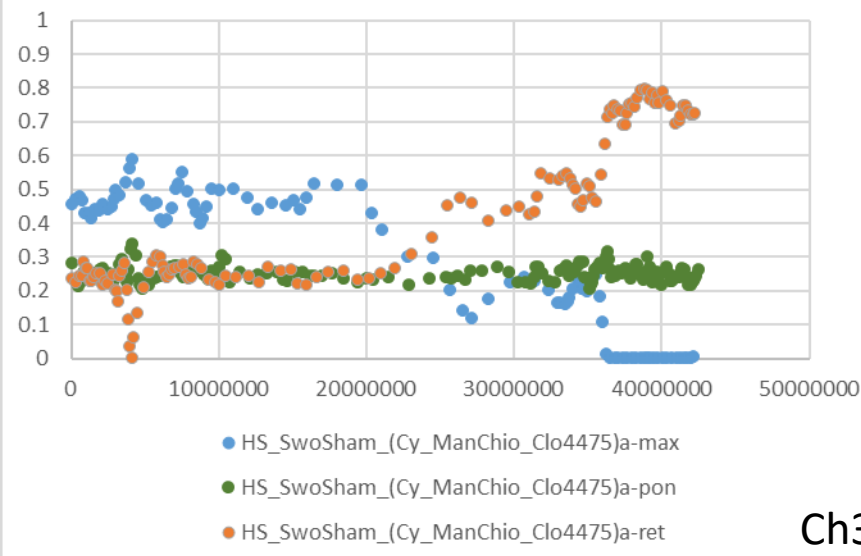

Ch3

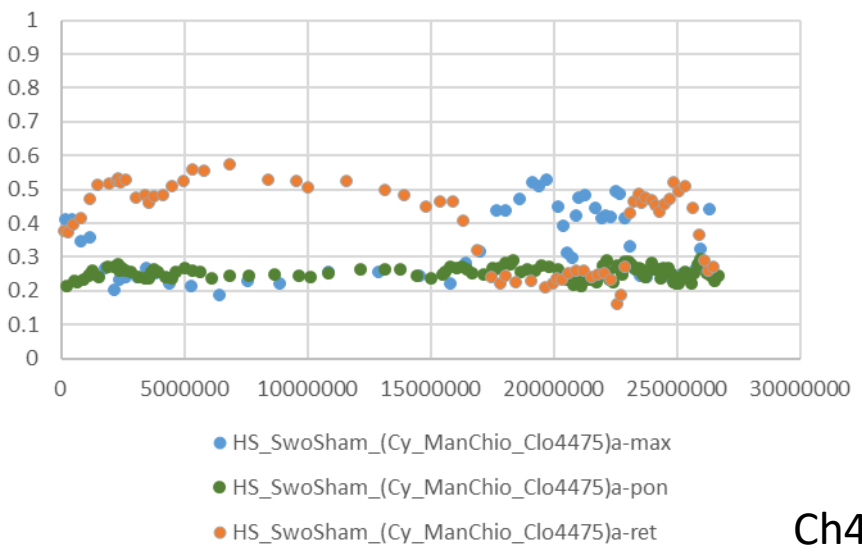

Ch4

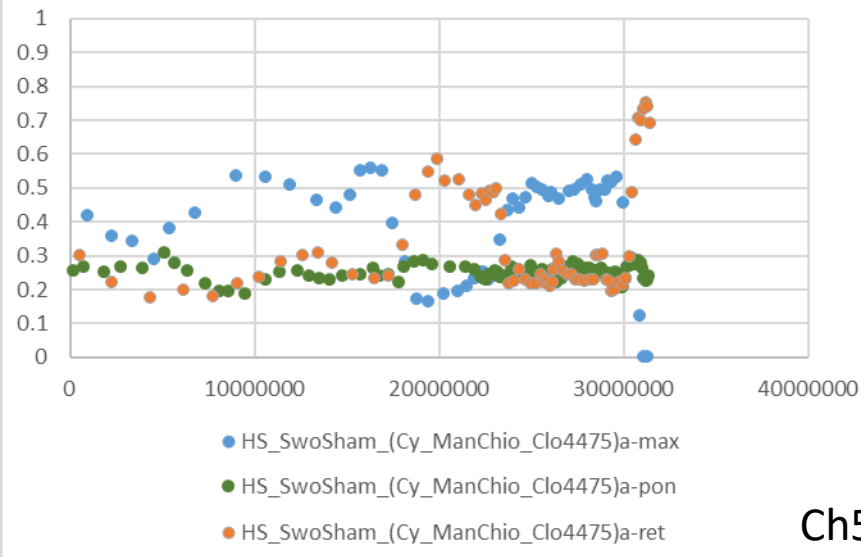

Ch5

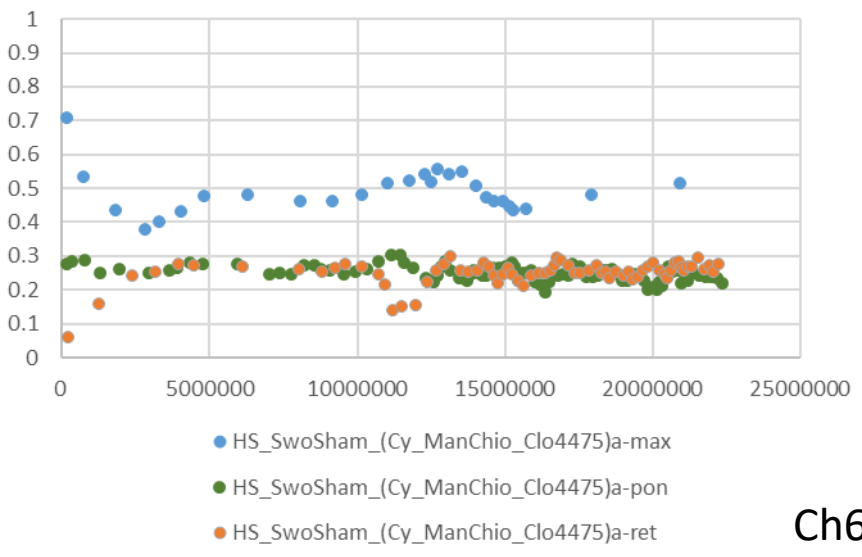

Ch6

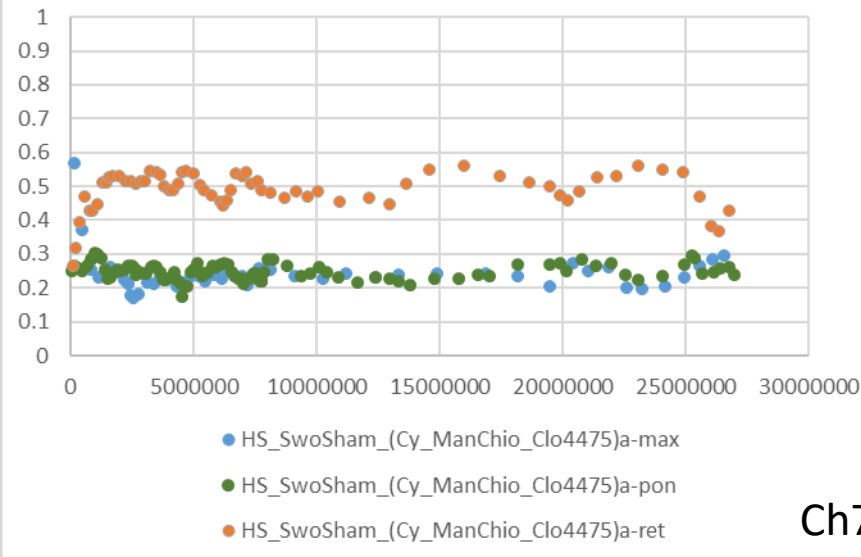

Ch7

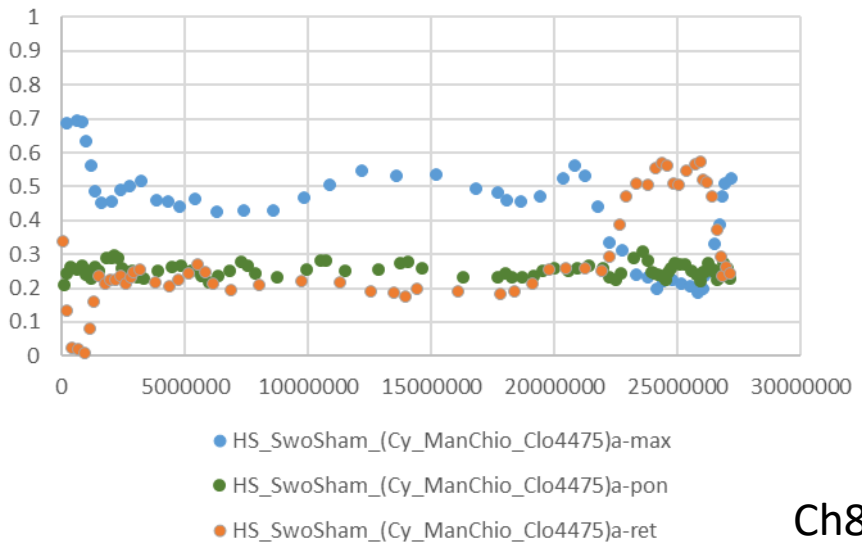

Ch8

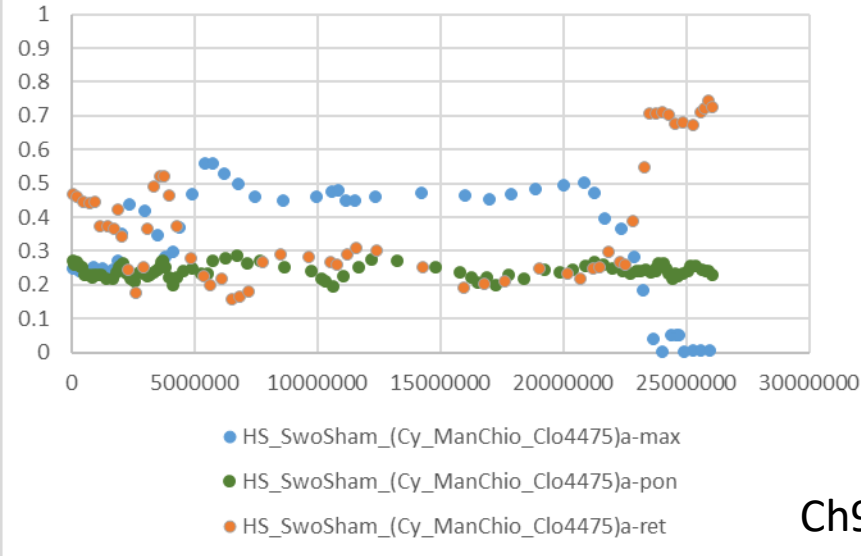

Ch9

HS\_SwoSham\_  
(Cy\_ManChio\_Clo4475)a



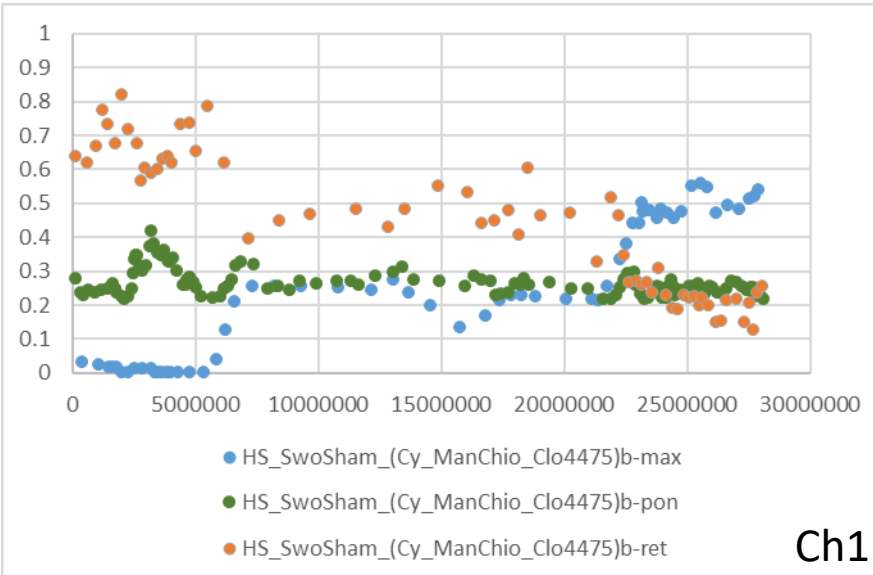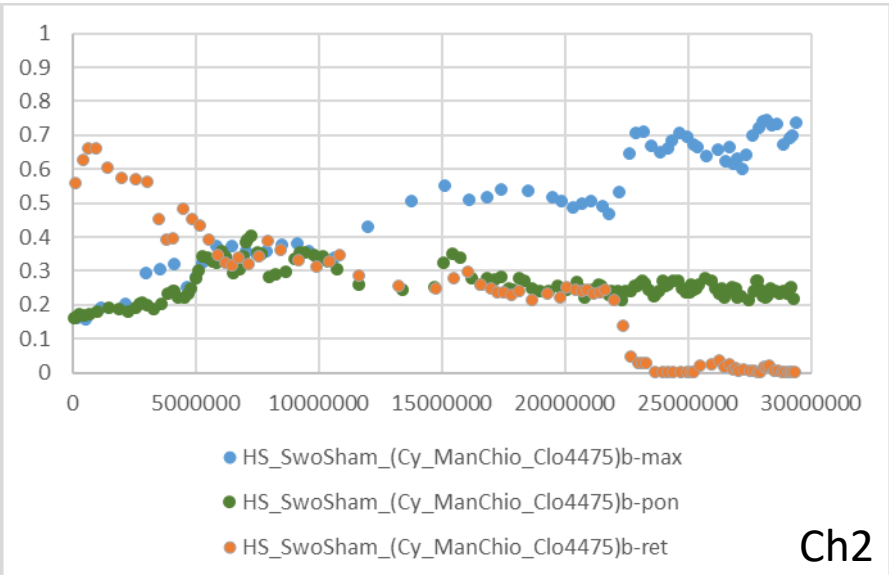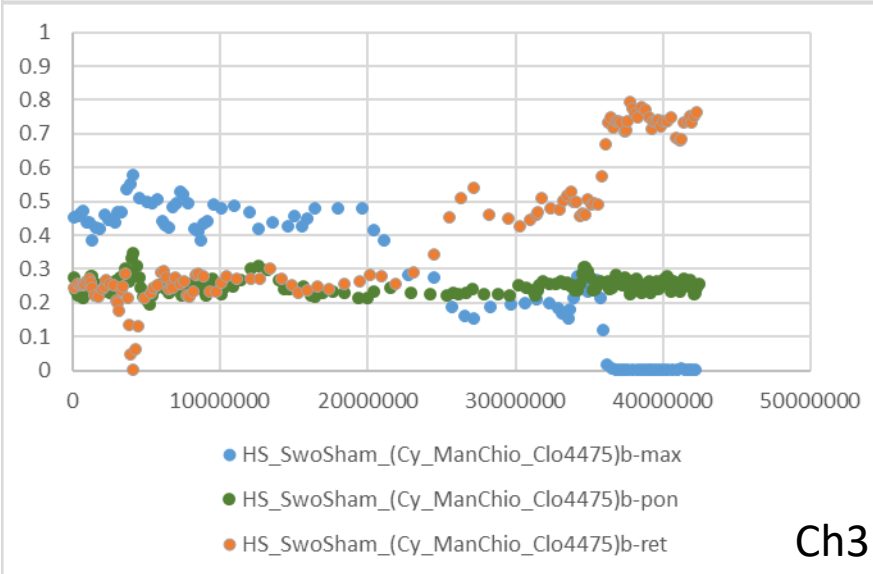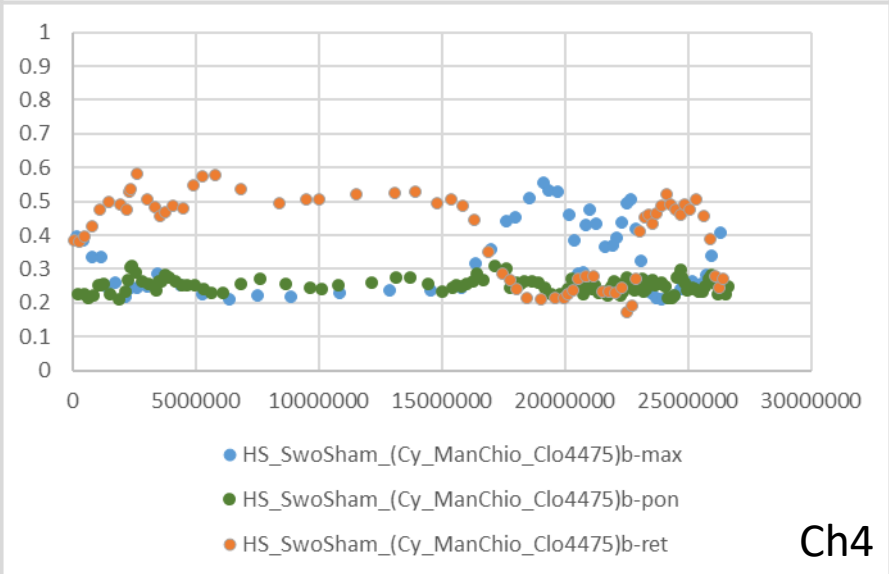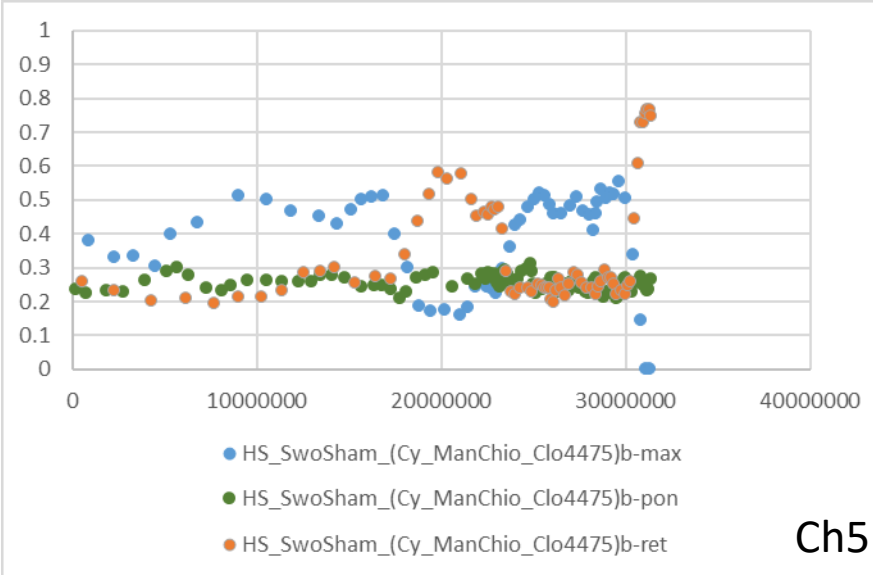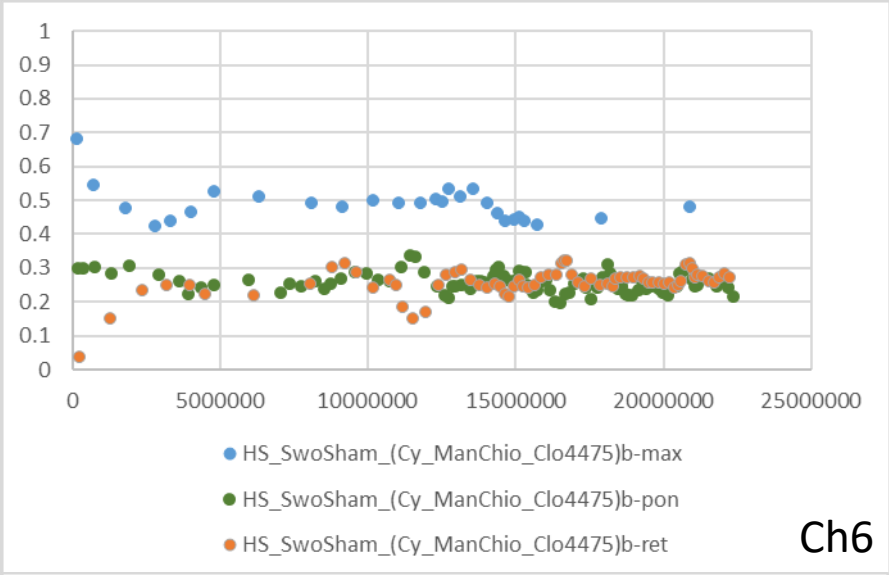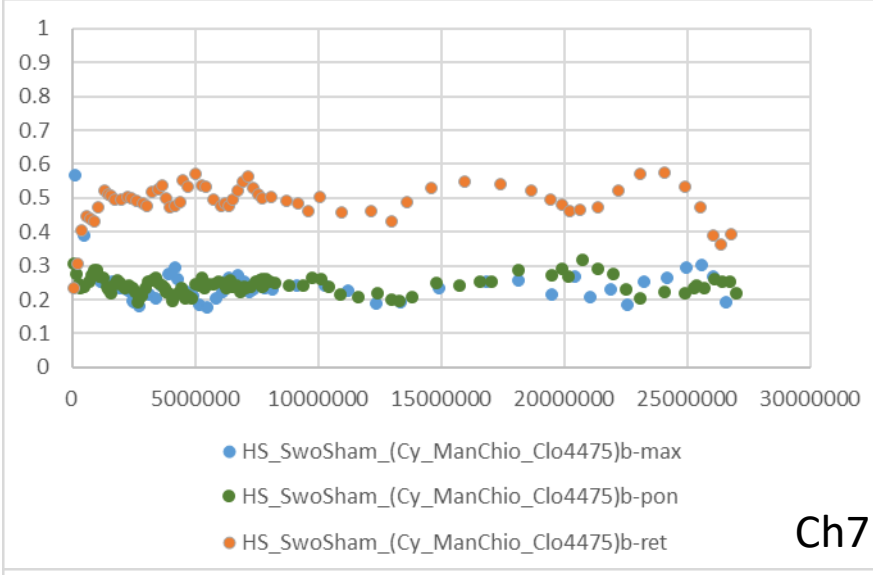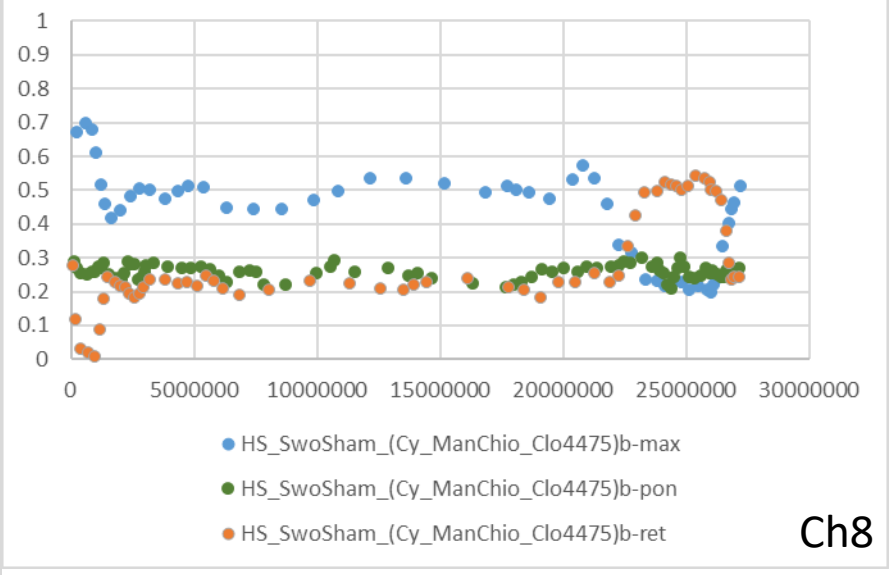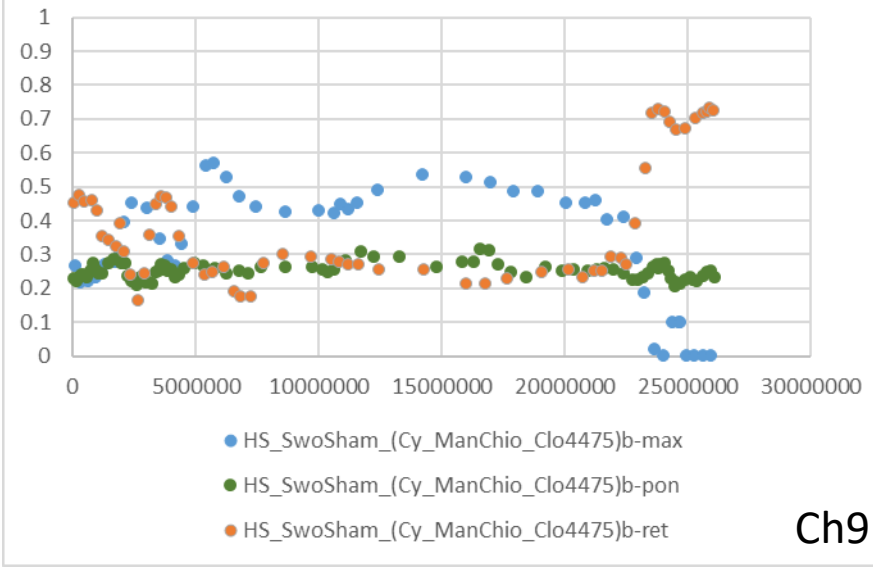

HS\_SwoSham\_  
(Cy\_ManChio\_Clo4475)b

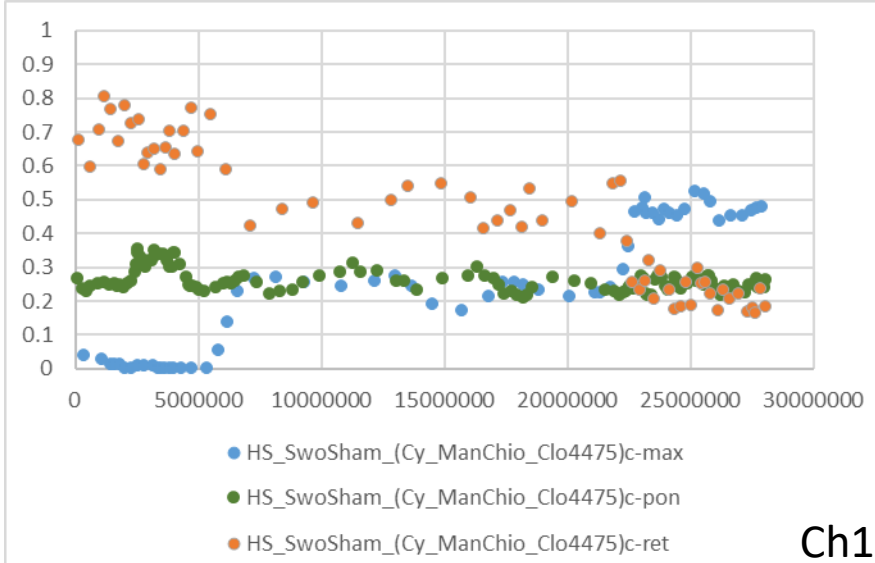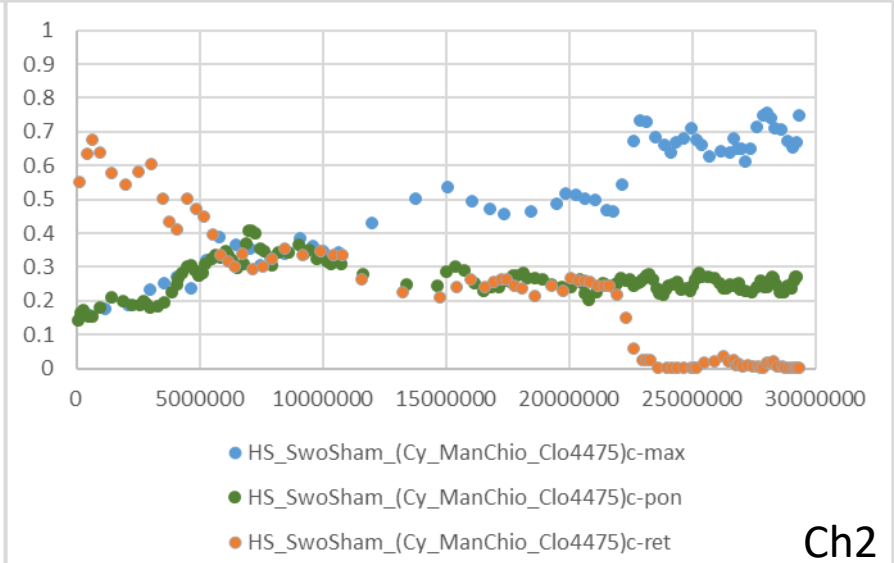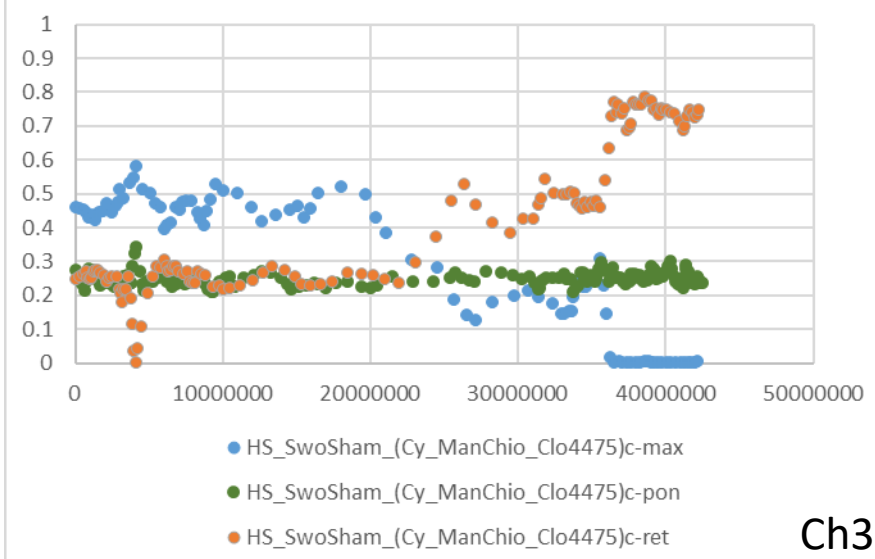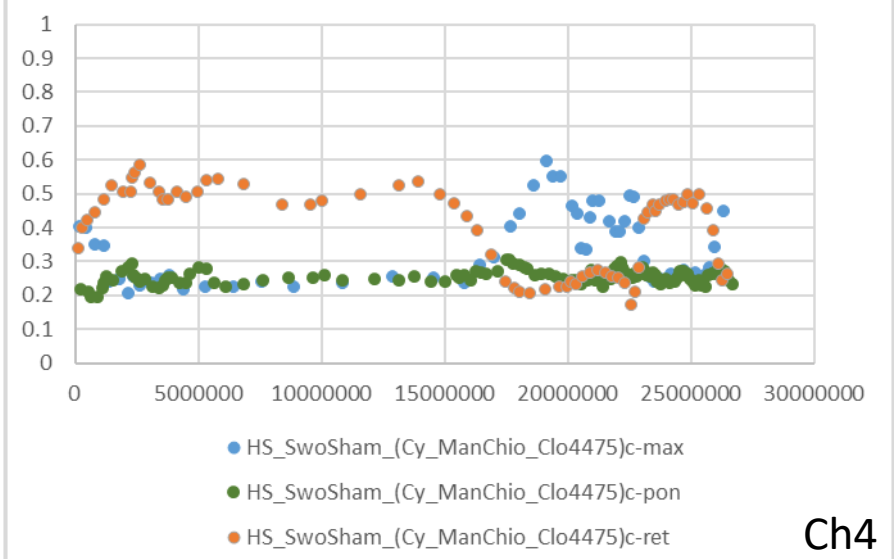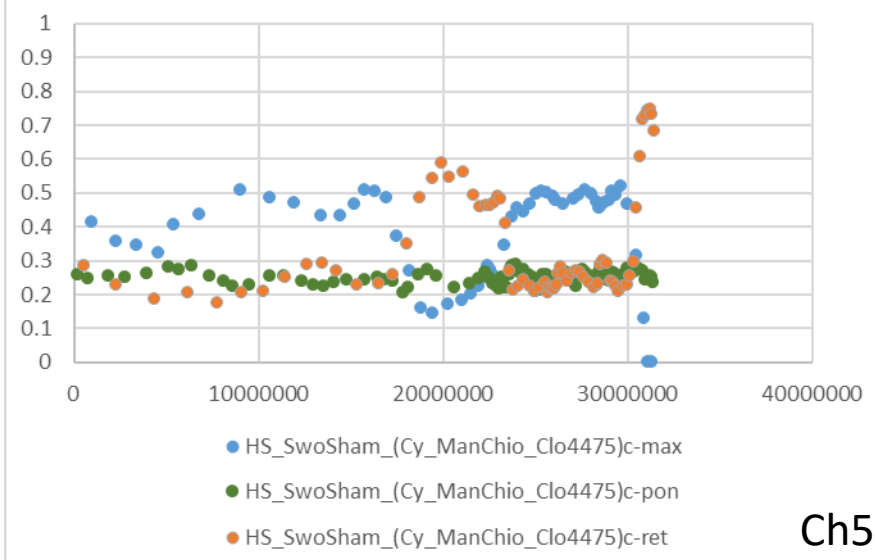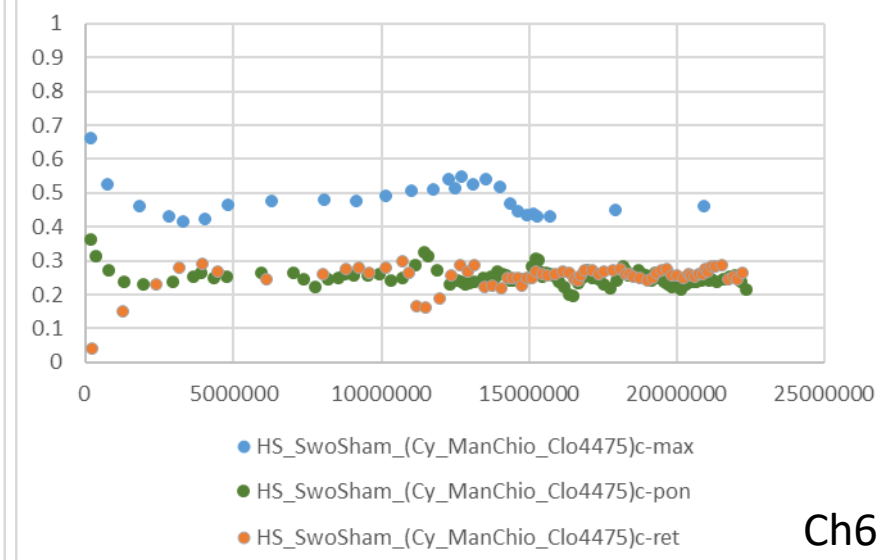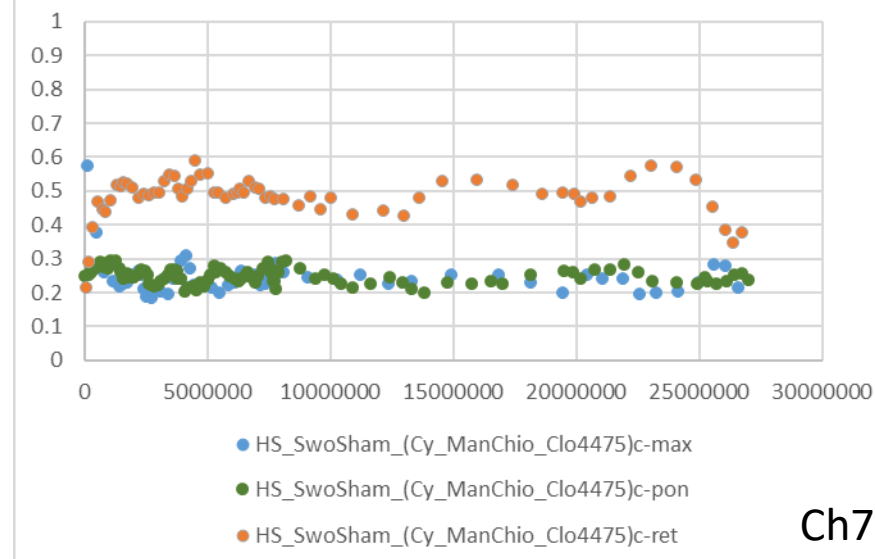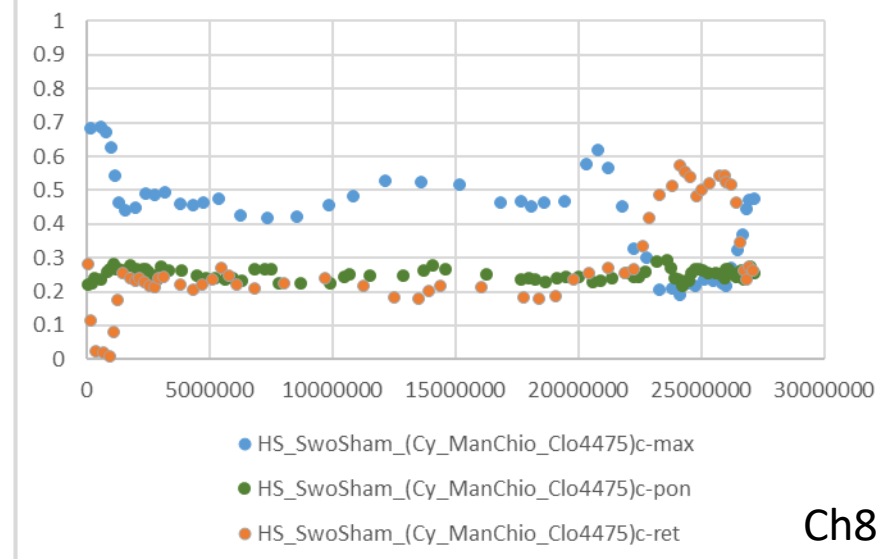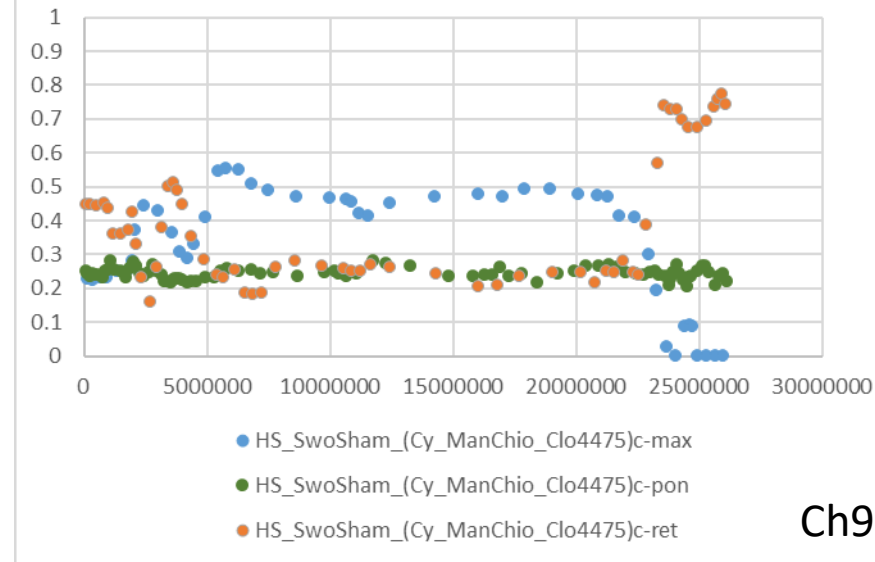

HS\_SwoSham\_  
(Cy\_ManChio\_Clo4475)c

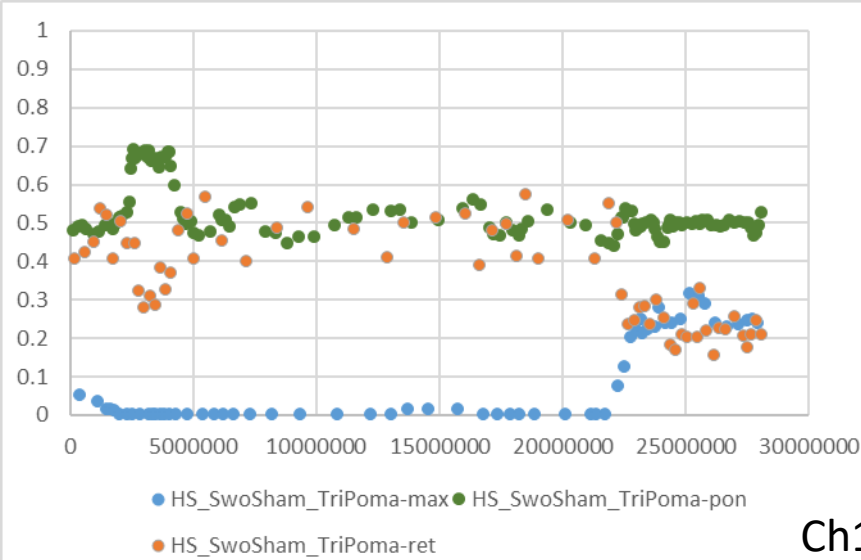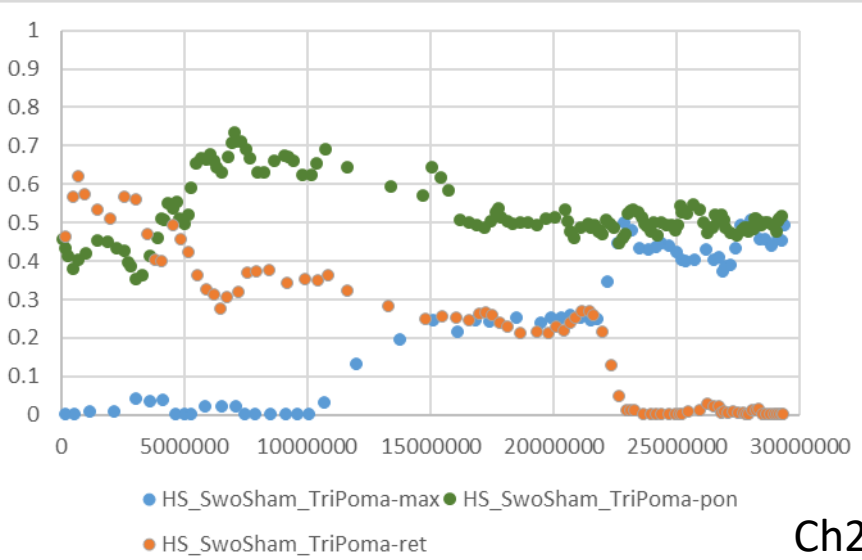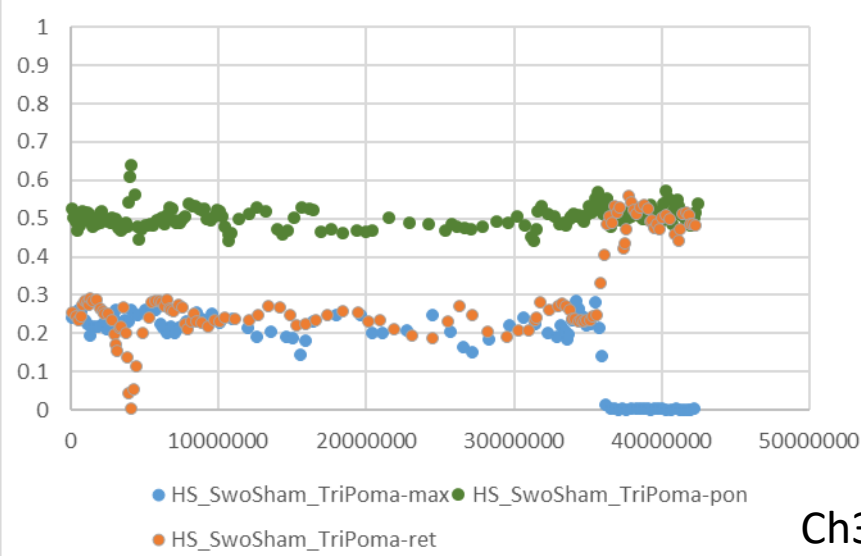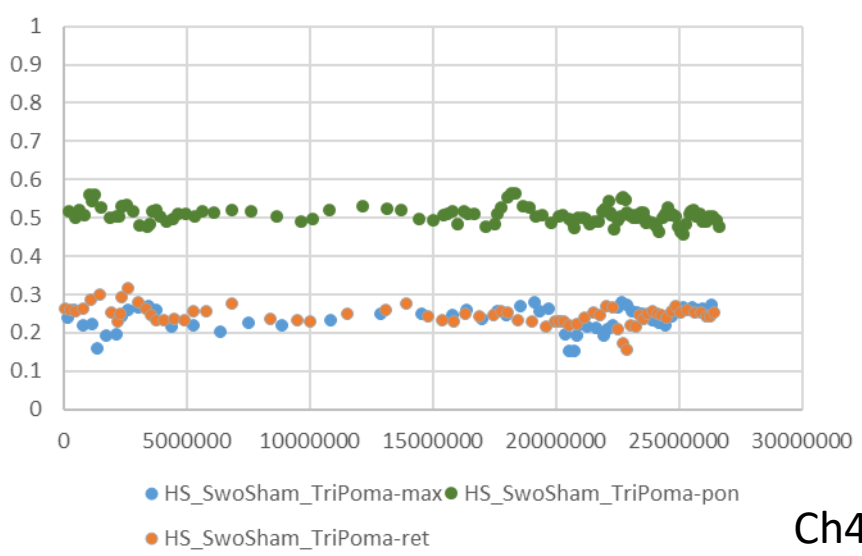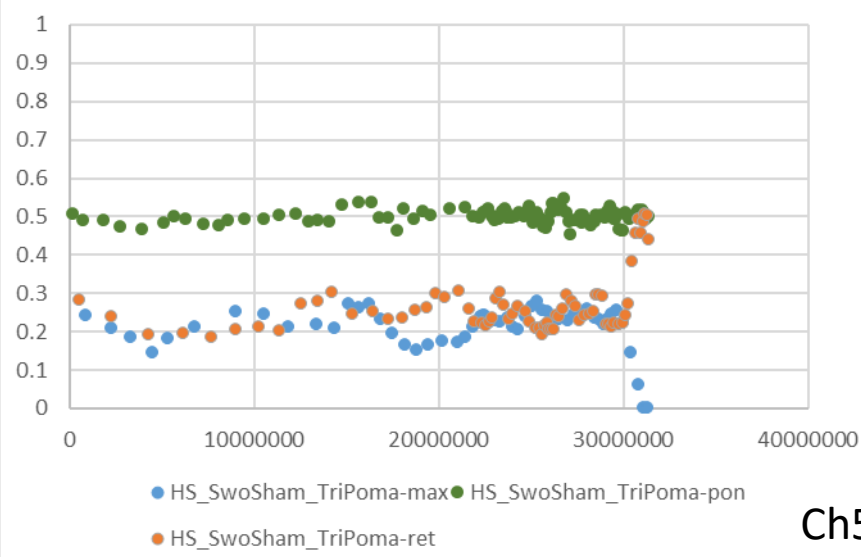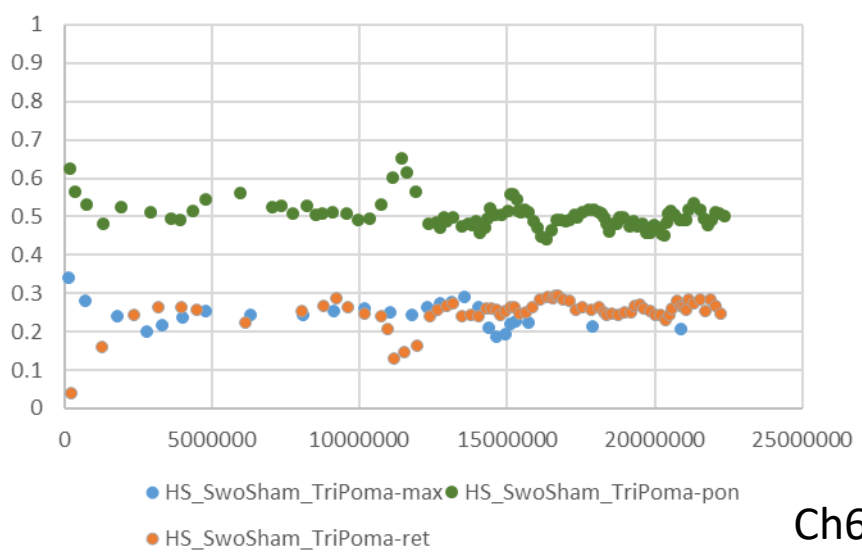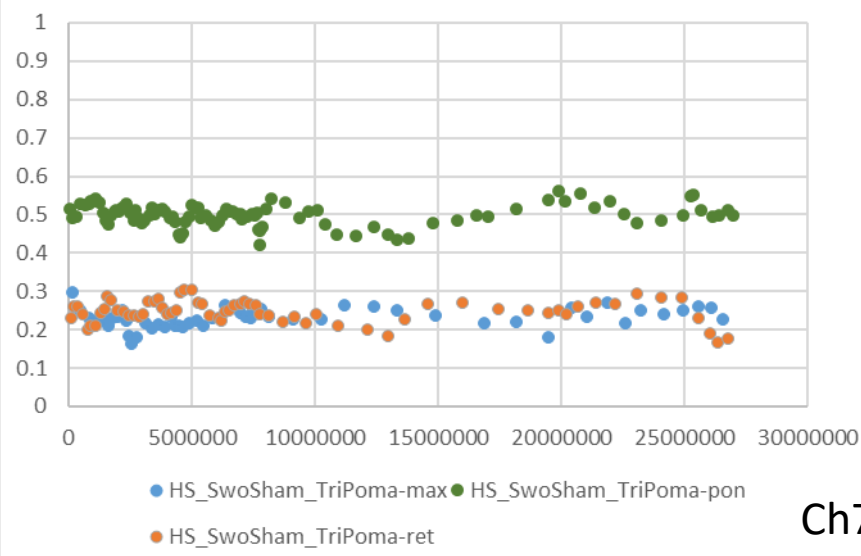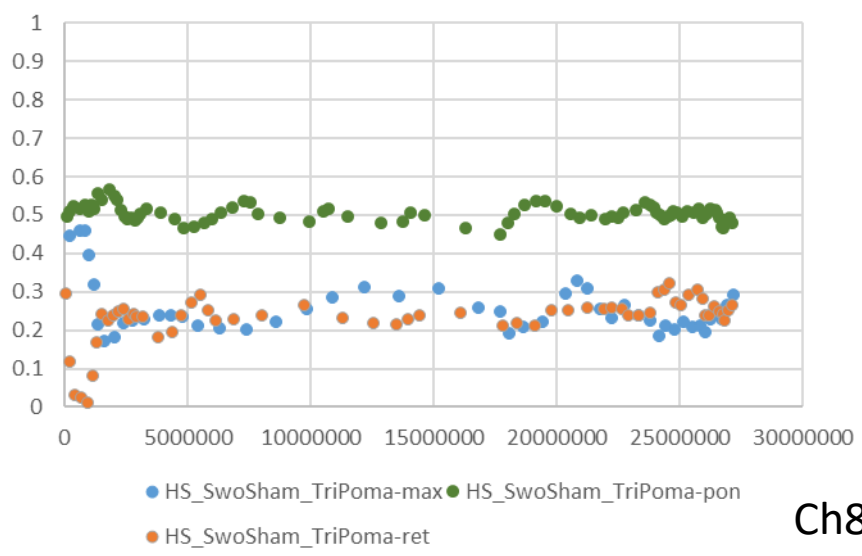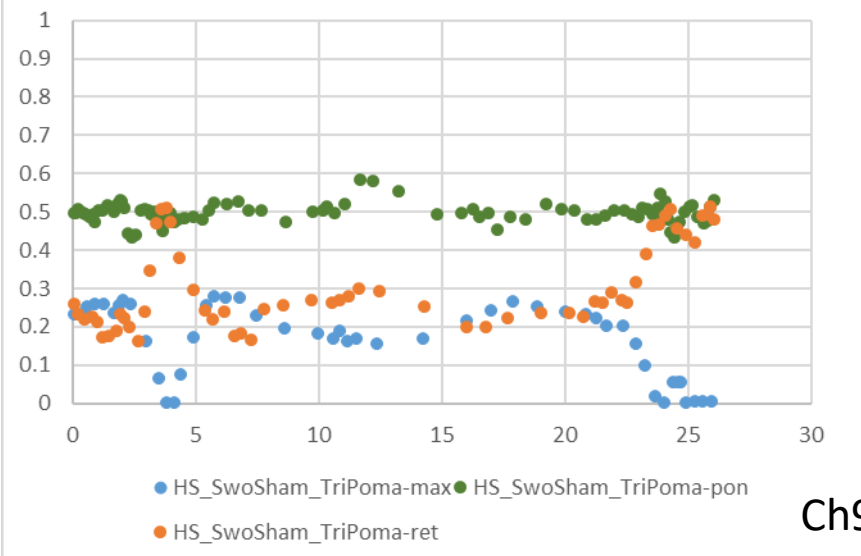

HS\_SwoSham\_TriPoma

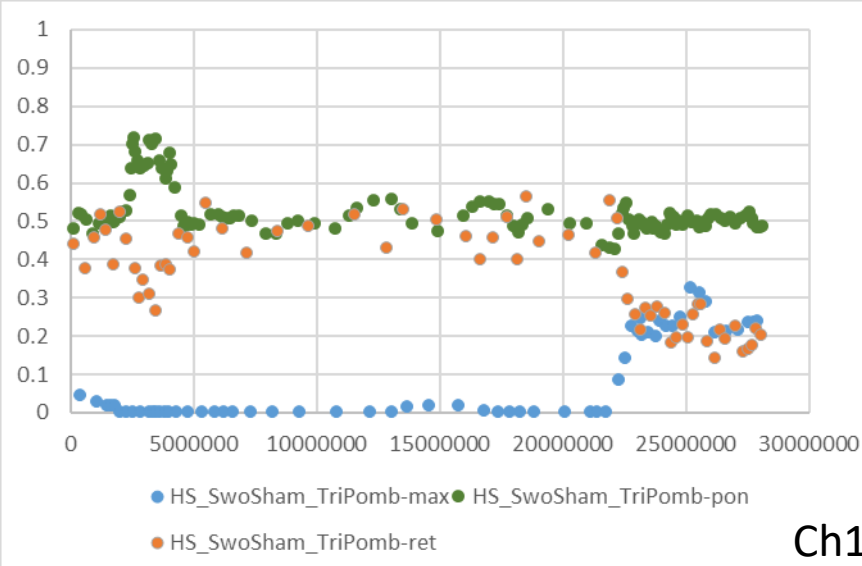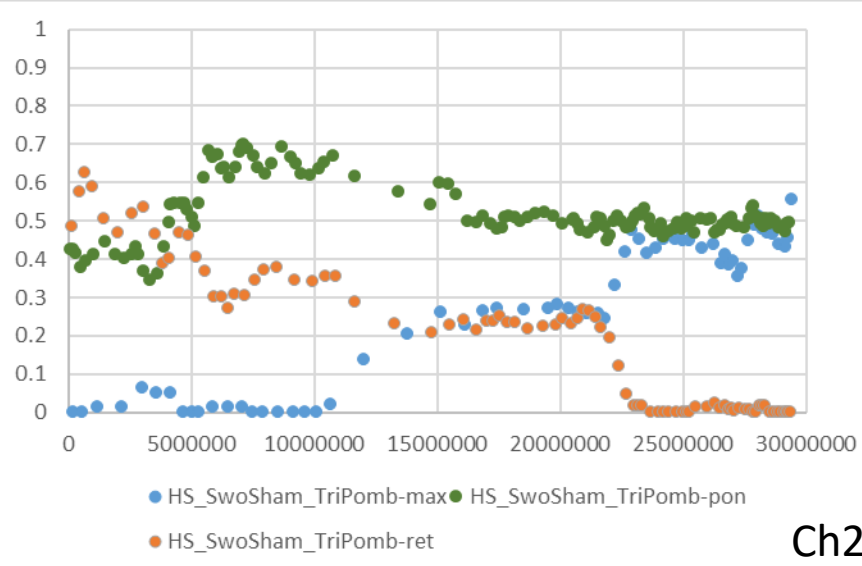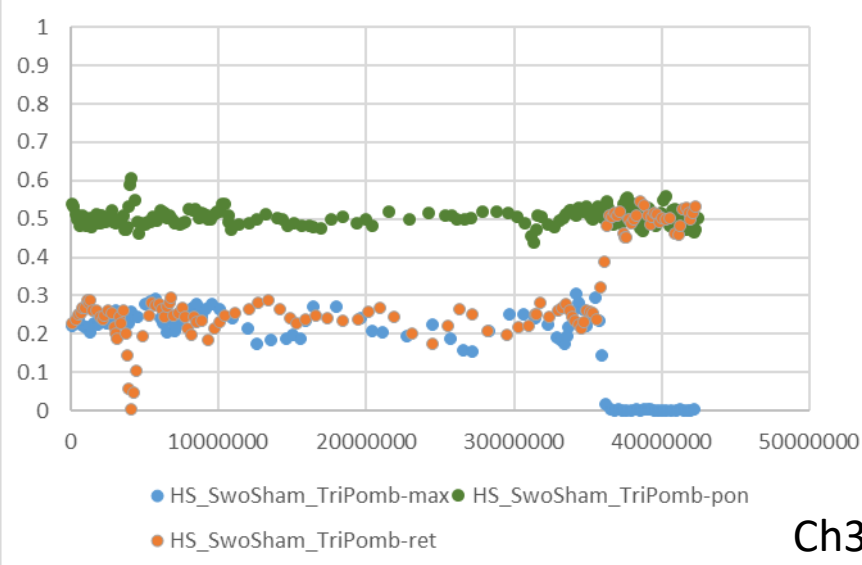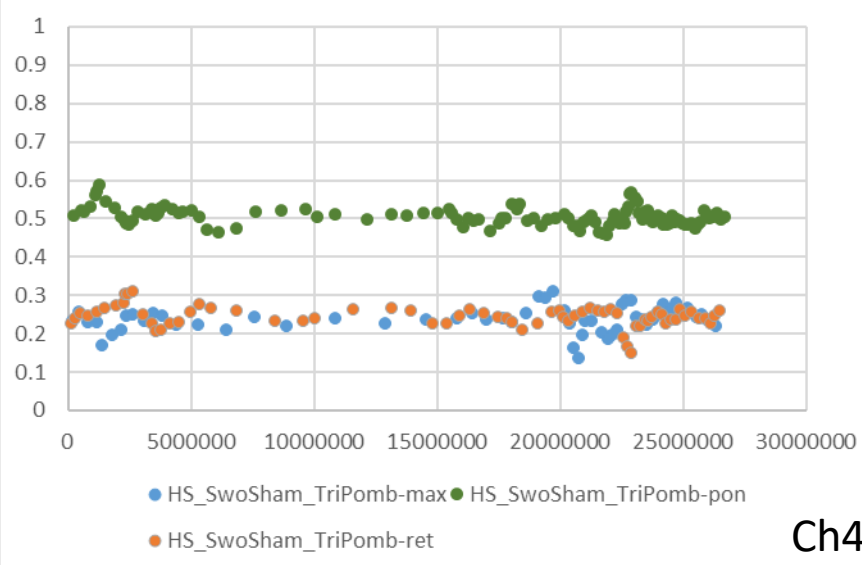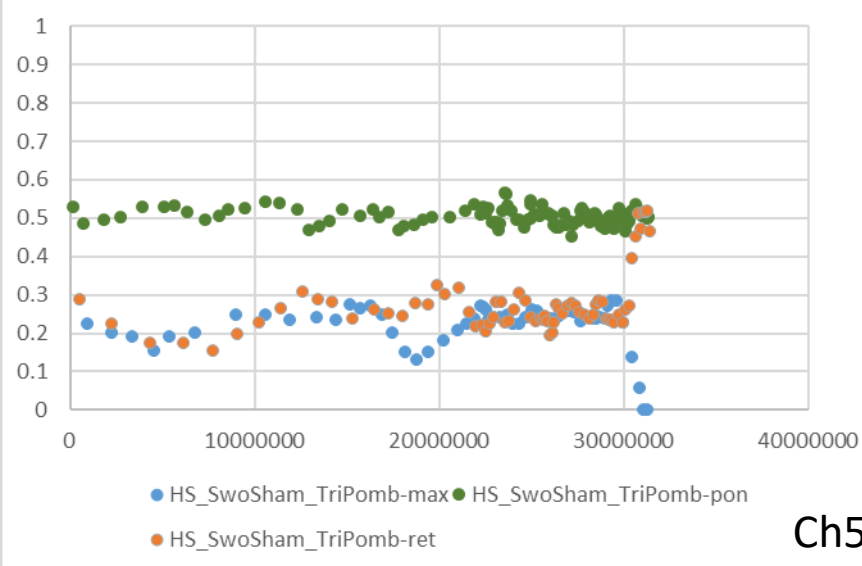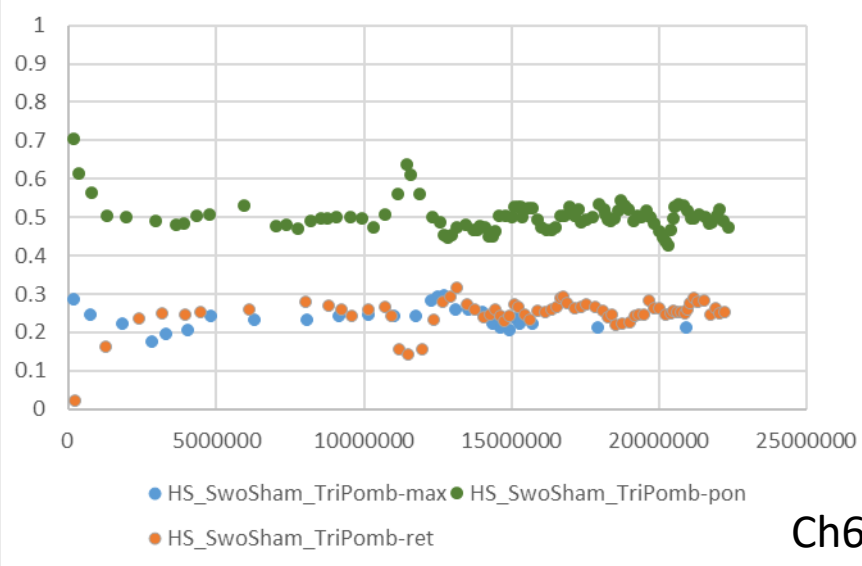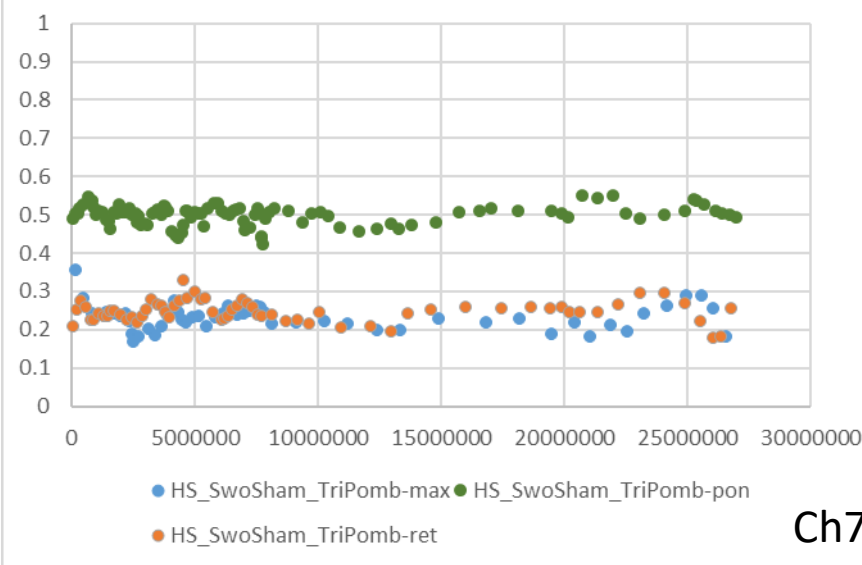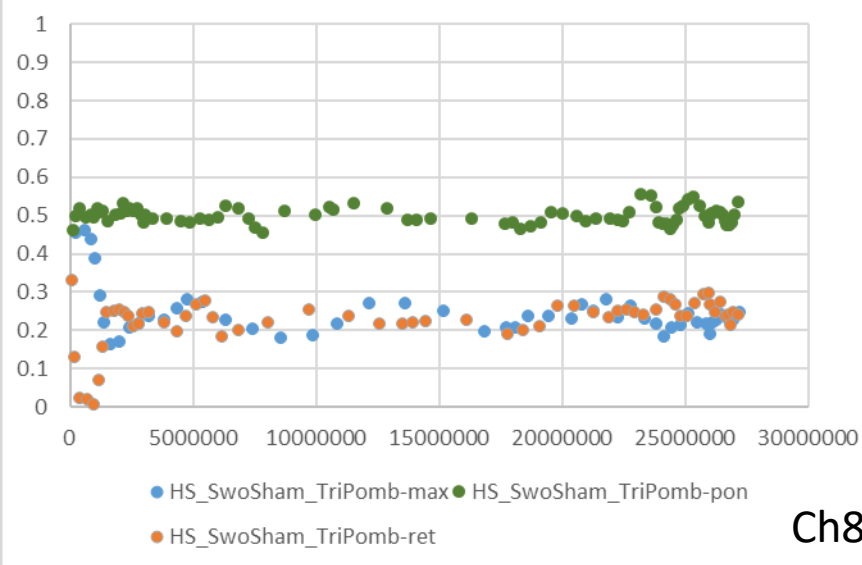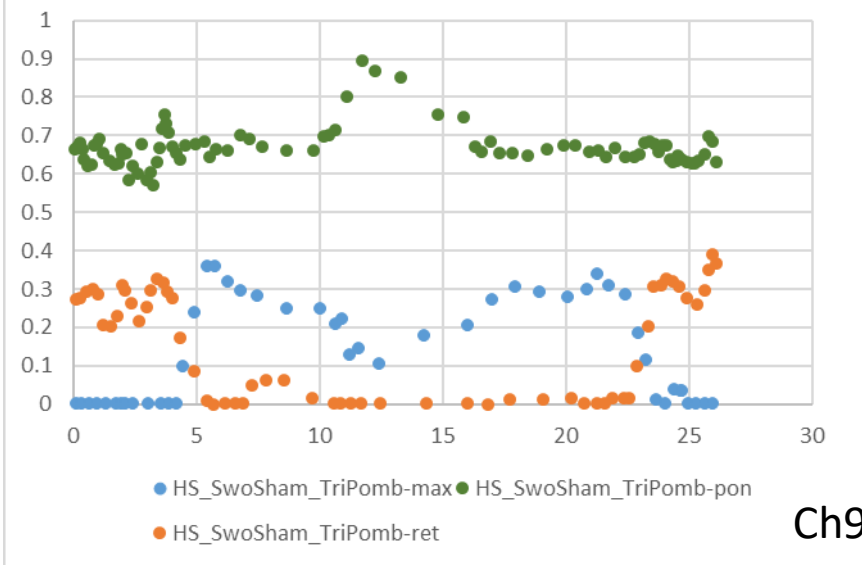

HS\_SwoSham\_TriPomb



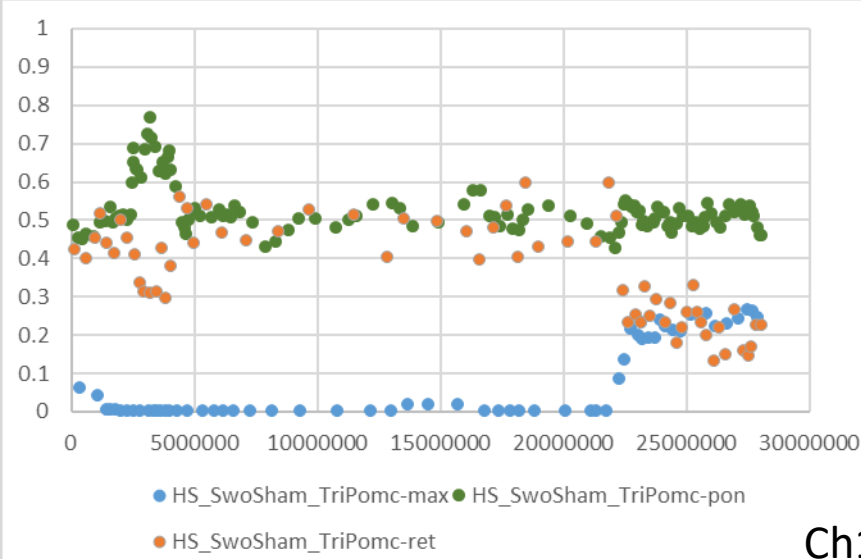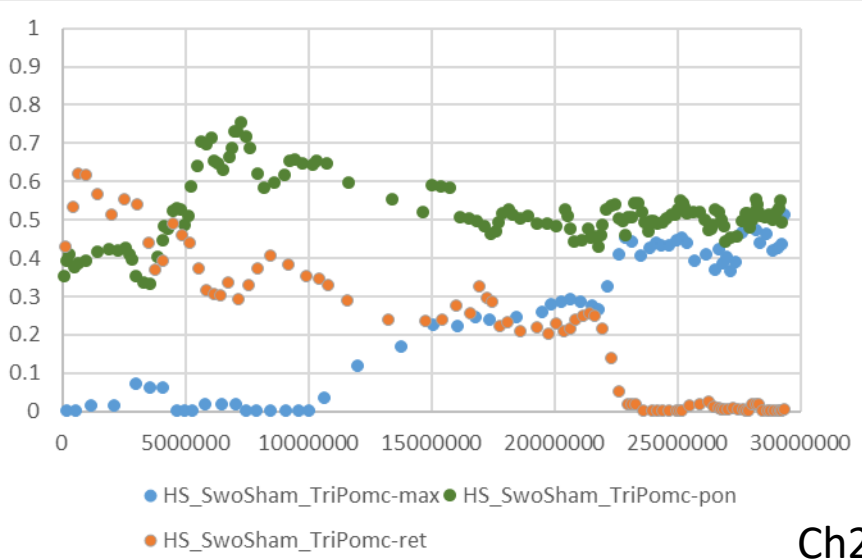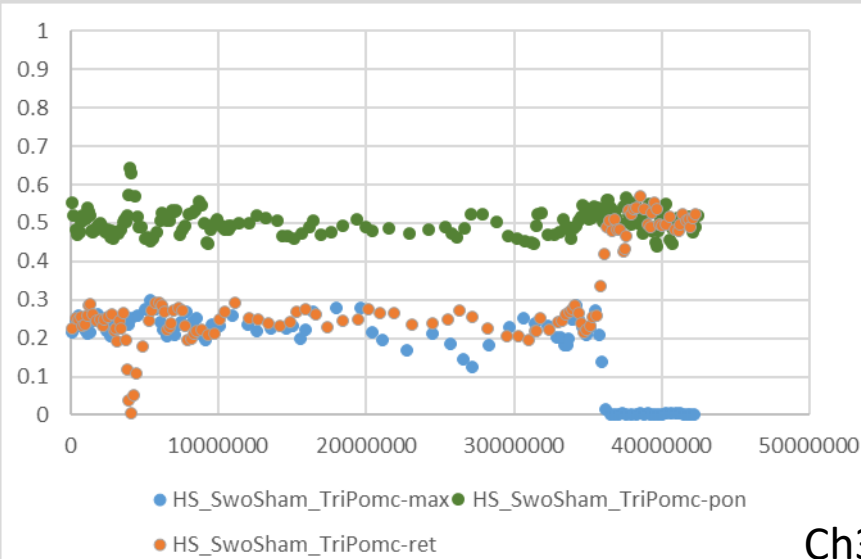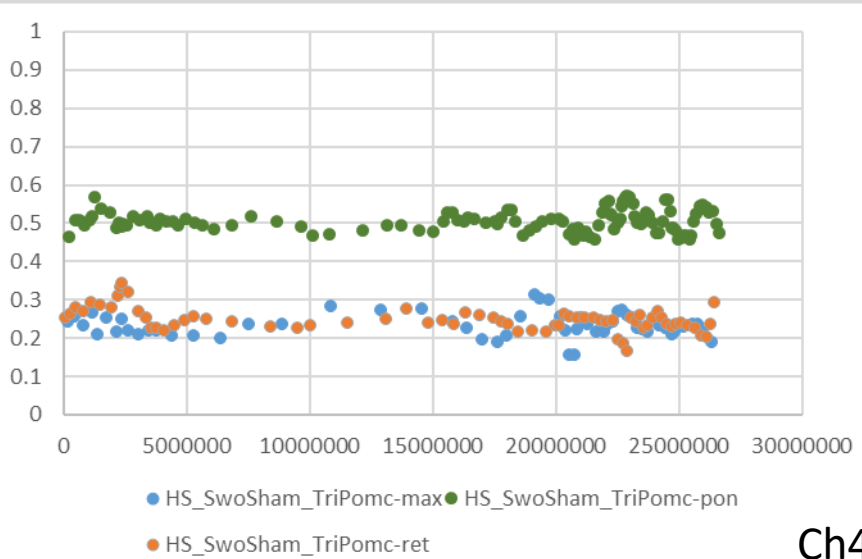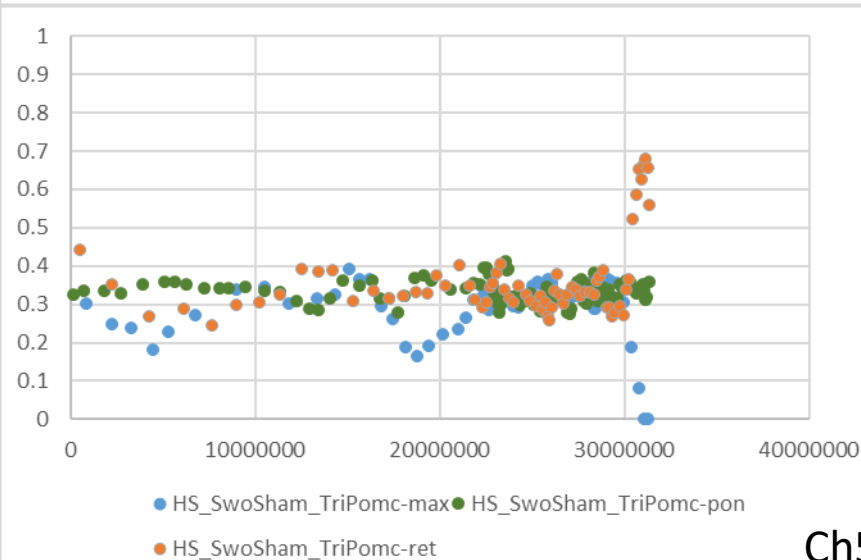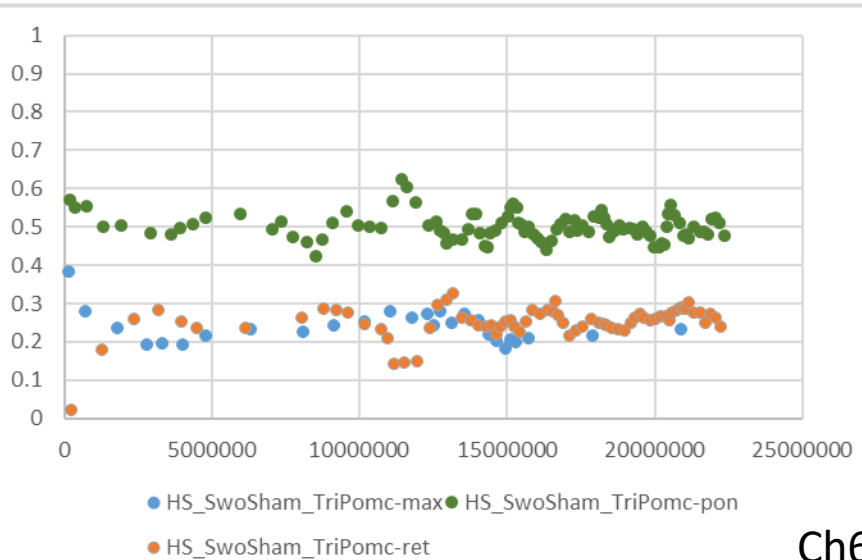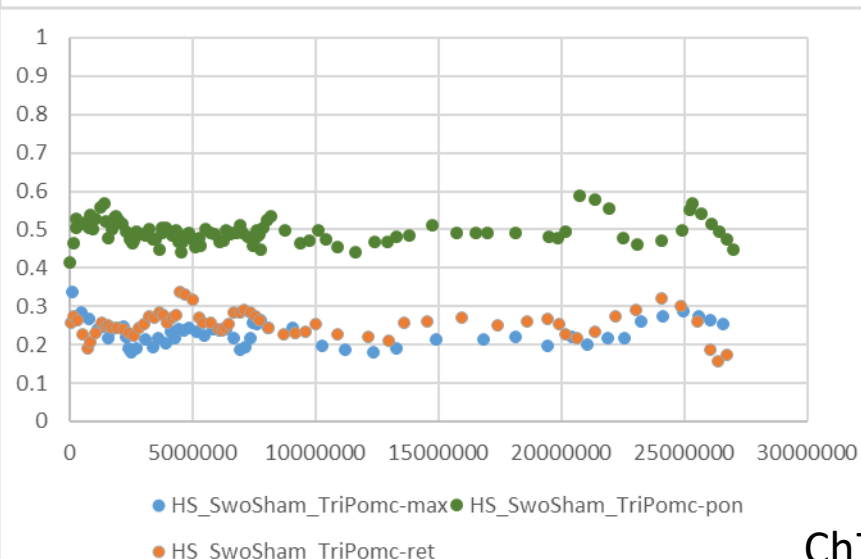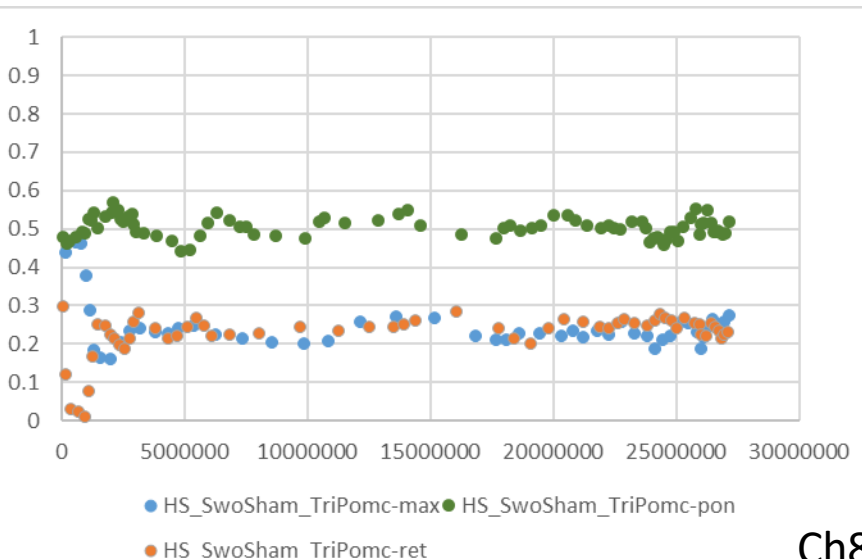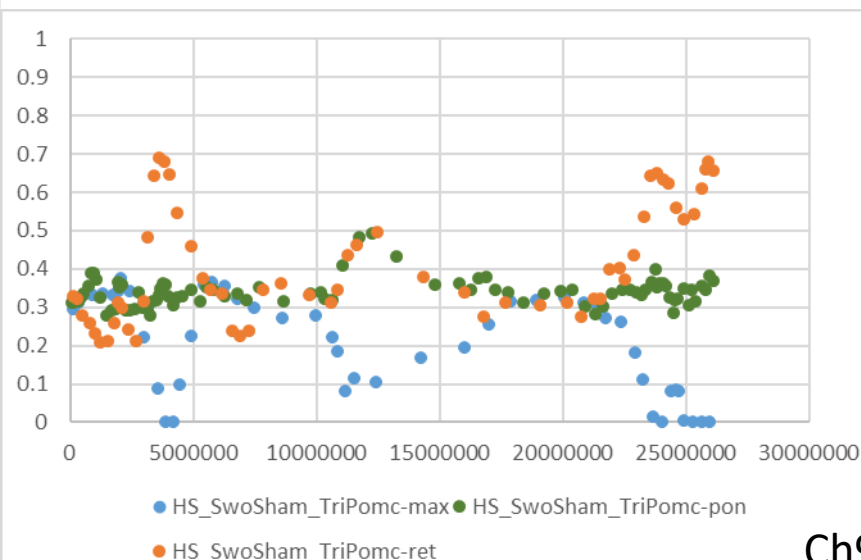

HS\_SwoSham\_TriPomc
